# Supplementary material for: Efficient, multi-hundred-gram scale access to E3 ubiquitin ligase ligands for degrader development
Source: Royal Society of Chemistry journal article supplement (doi:10.1039/d3ob00983a), 2023-01-01

**VH 032, amine 2HCl (1)**  
**<sup>1</sup>H NMR (CD<sub>3</sub>OD)**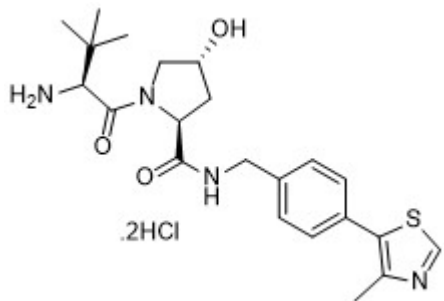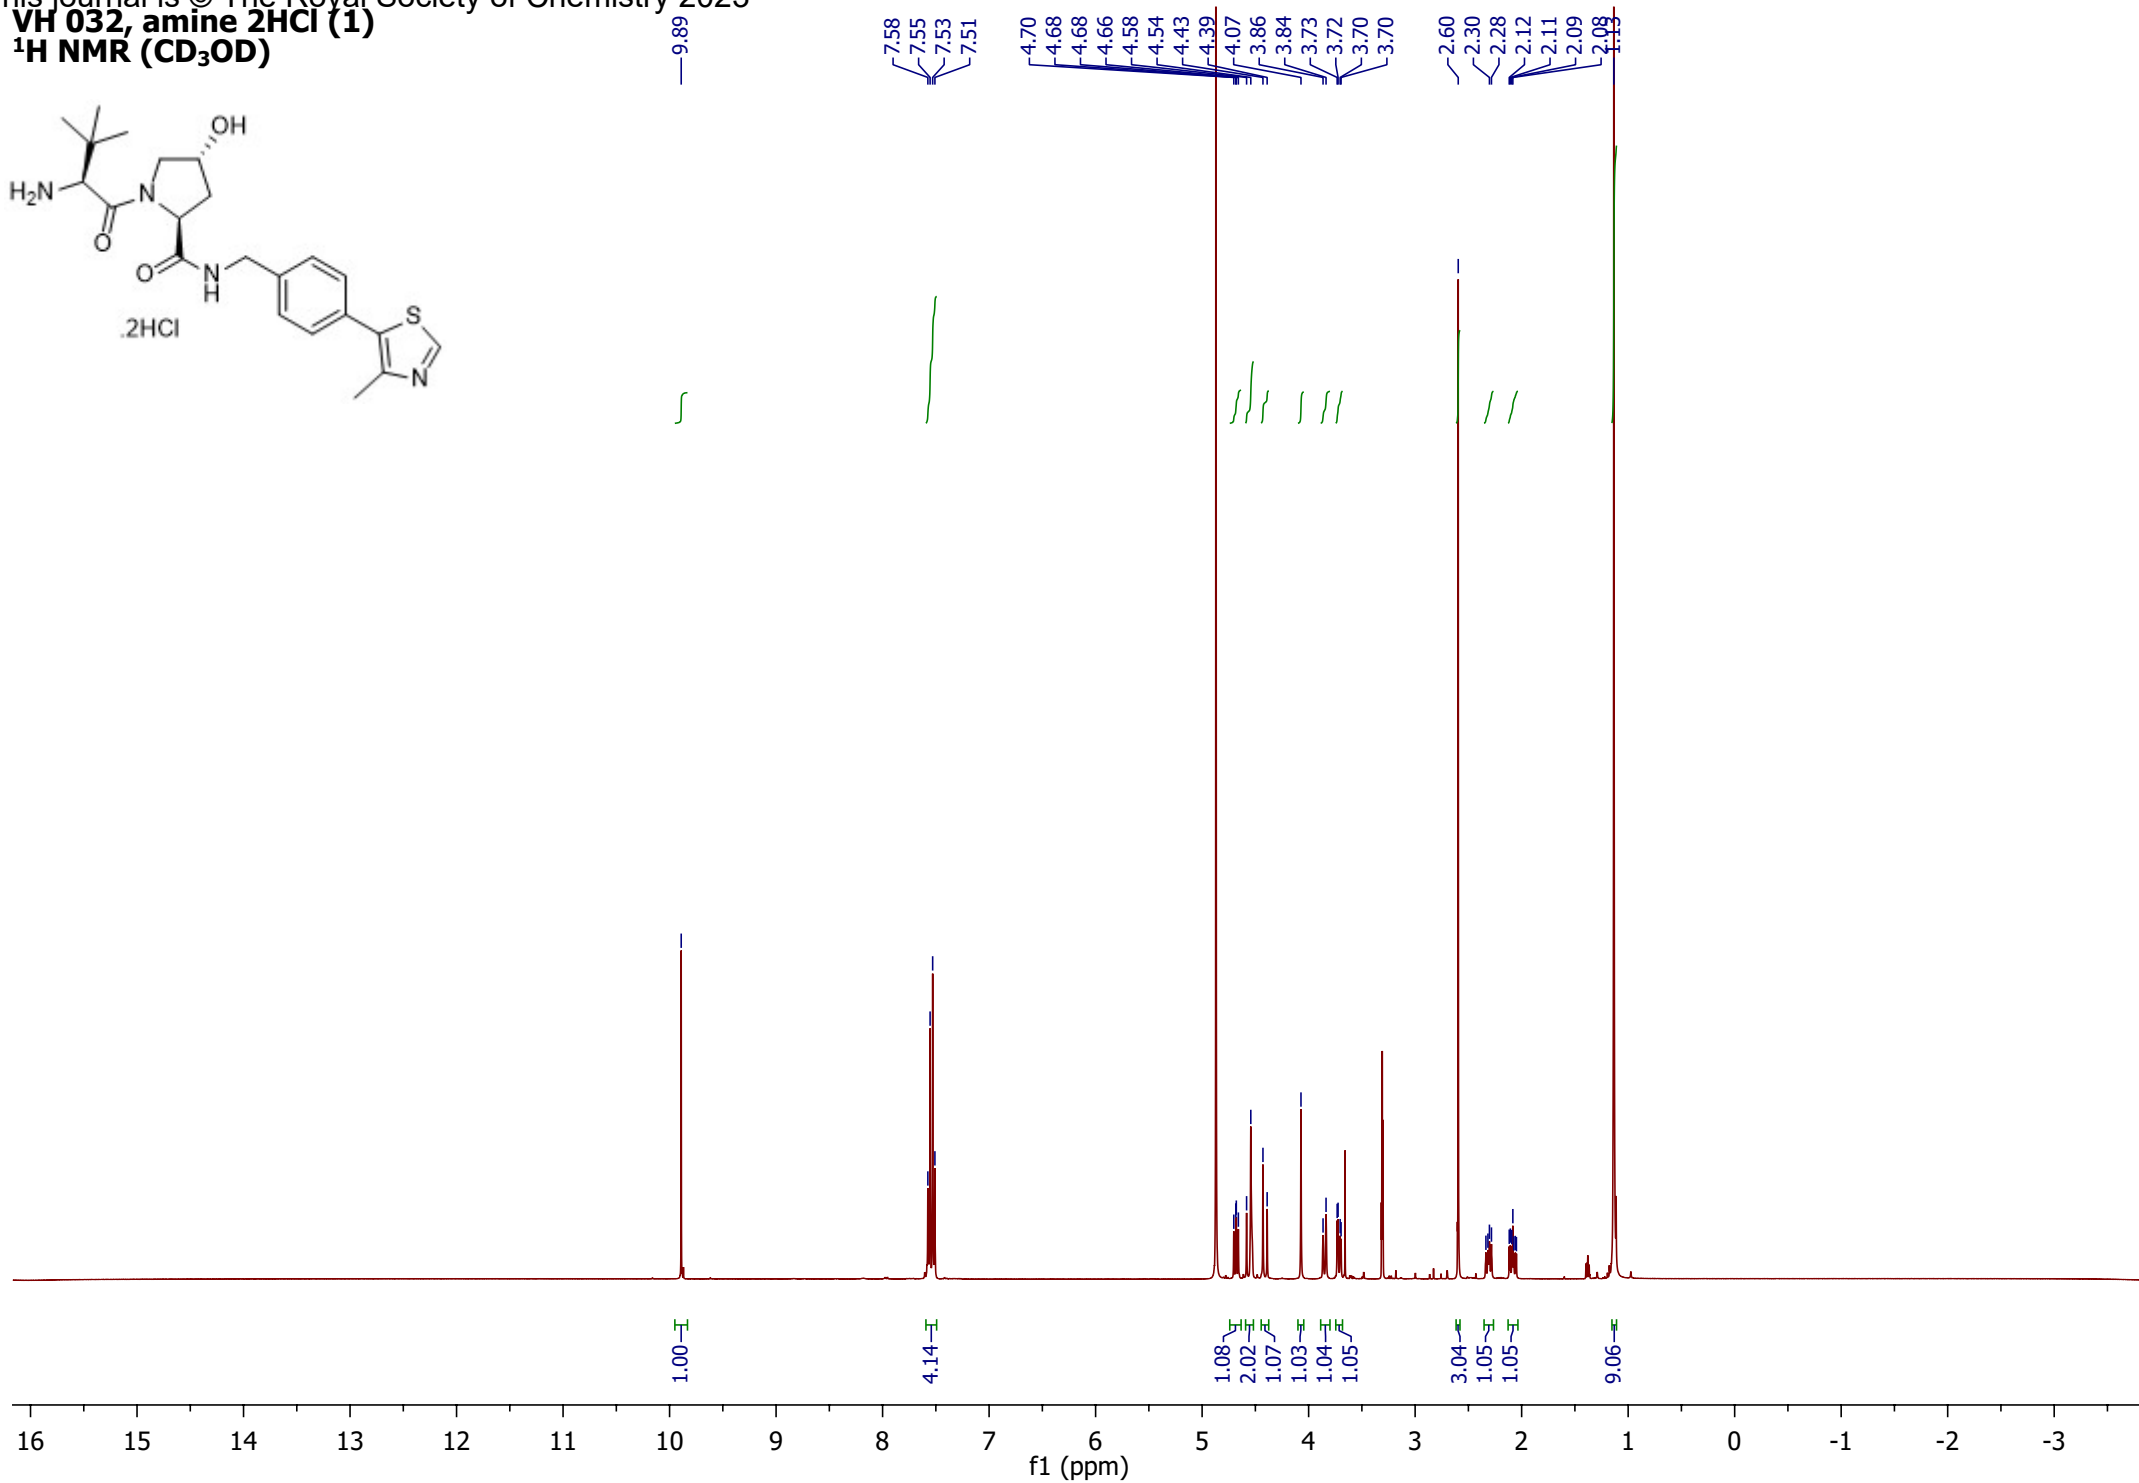

VH 032, amine (1)

<sup>13</sup>C NMR (CD<sub>3</sub>OD)

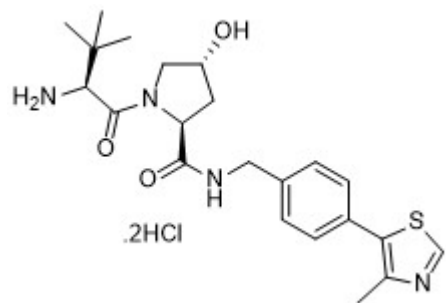

174.13  
168.57  
167.47  
156.48  
156.29  
143.00  
142.33  
137.15  
130.47  
129.38  
128.30  
124.49  
118.18  
111.92  
110.63  
109.43  
100.80  
97.98  
96.63  
94.63  
88.61  
88.07  
85.68  
80.01  
71.16  
68.14  
63.53  
60.99  
60.35  
58.09  
52.81  
49.64  
49.43  
49.21  
49.00  
48.79  
48.57  
48.36  
43.62  
39.09  
35.78  
26.66  
13.28

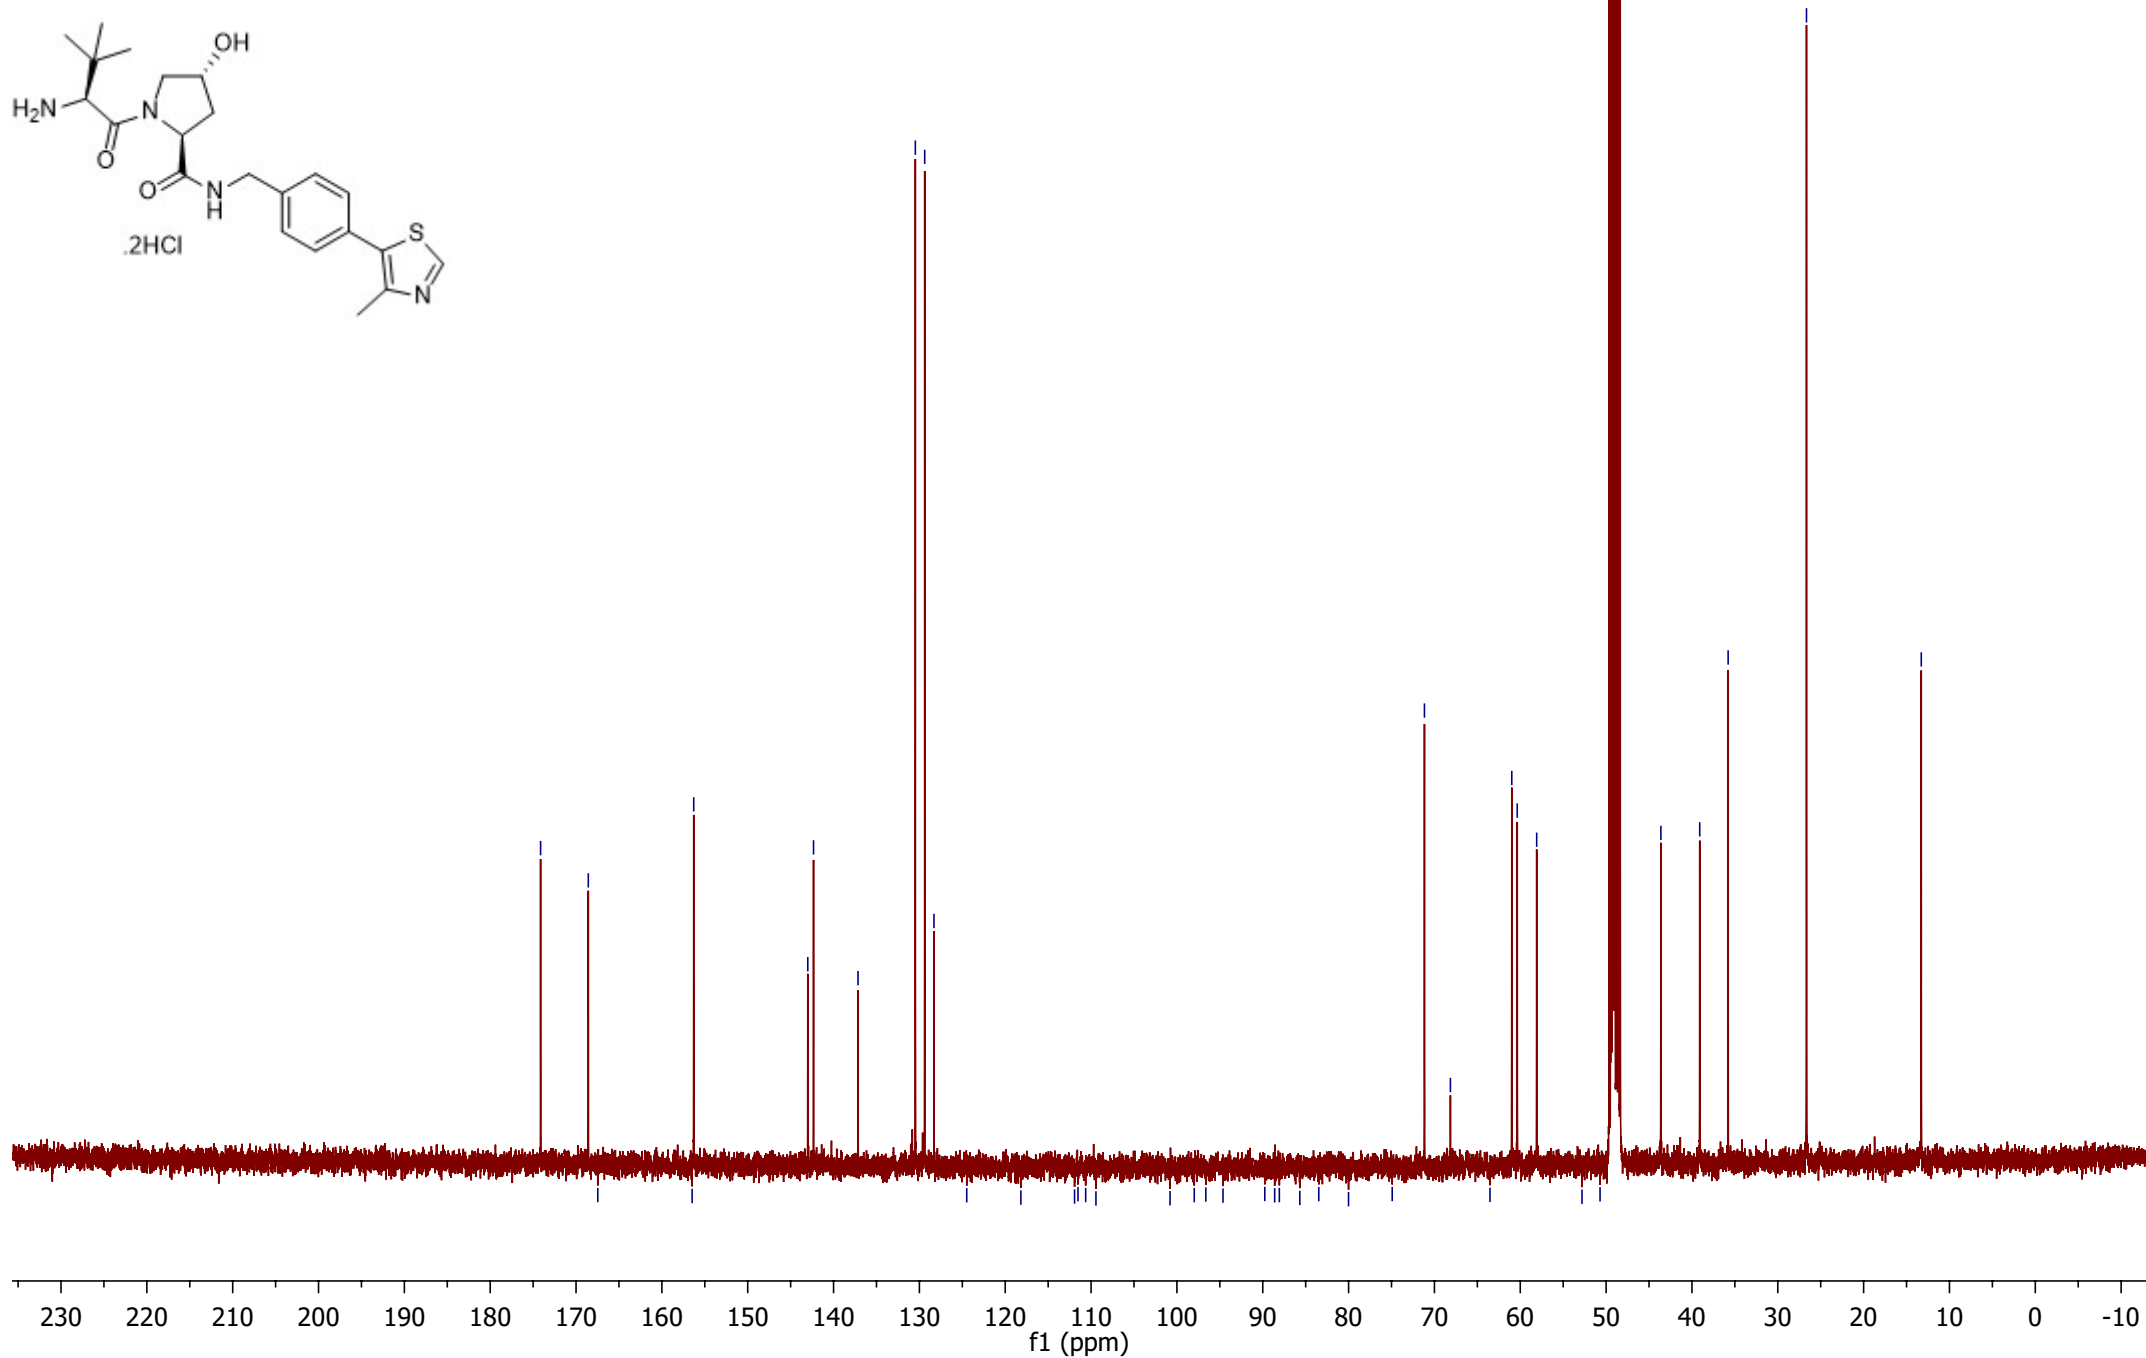

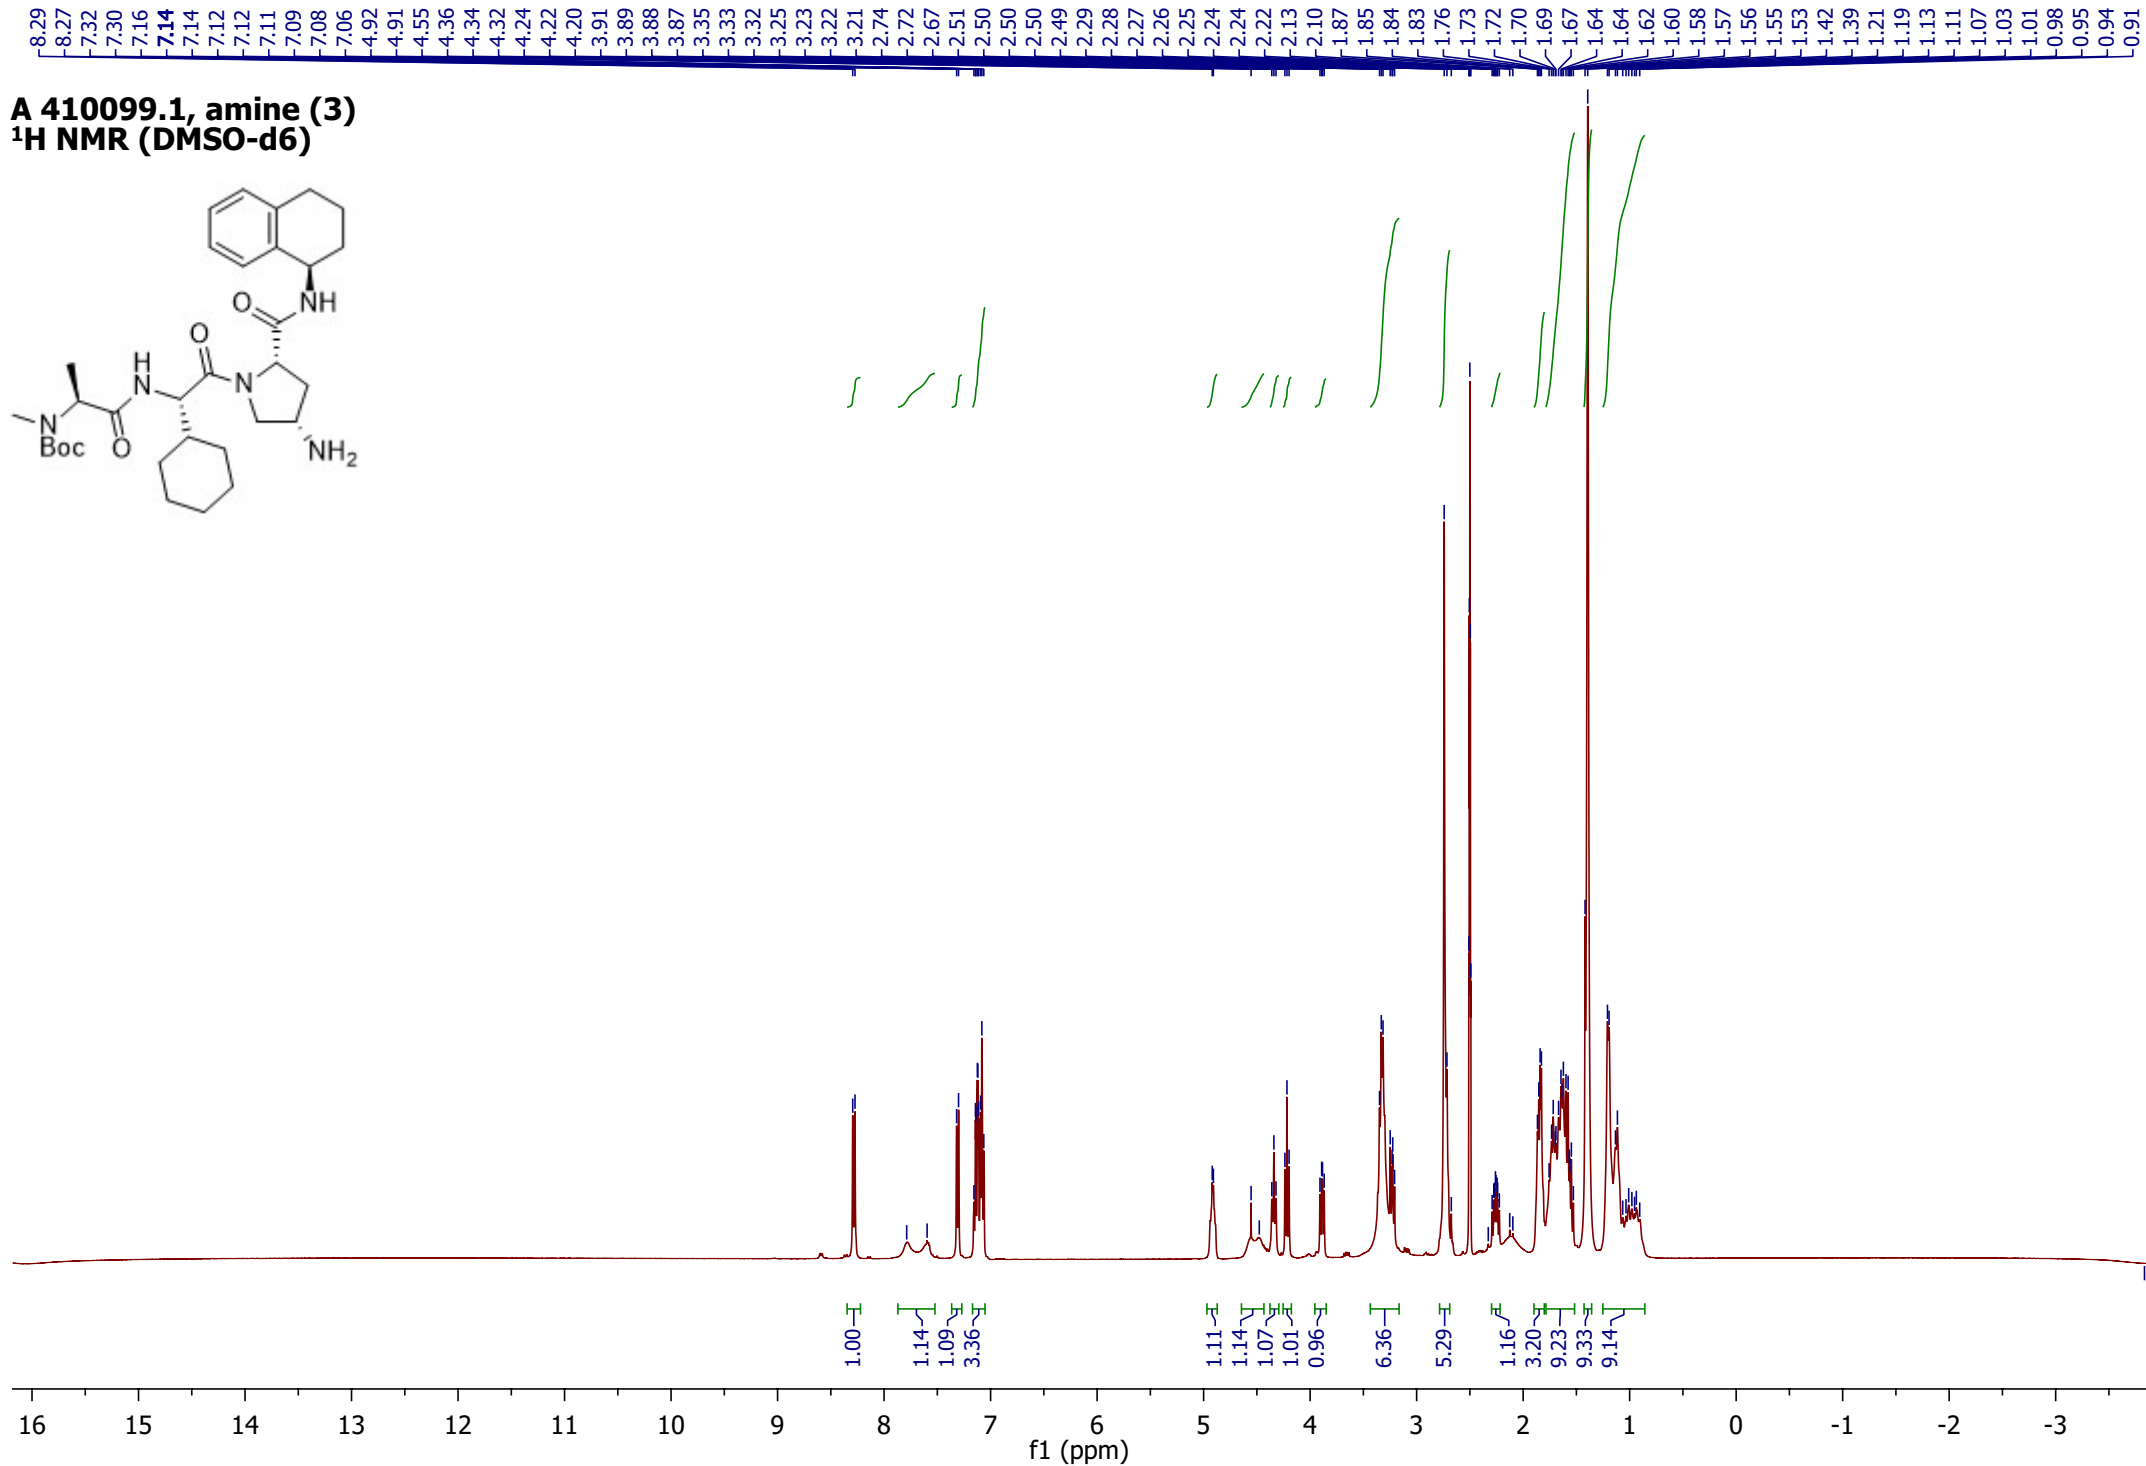

**4'-Fluorothalidomide (4)**  
**<sup>1</sup>H NMR (DMSO-d6)**

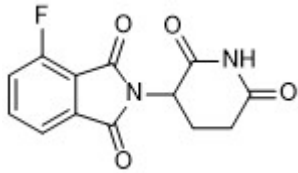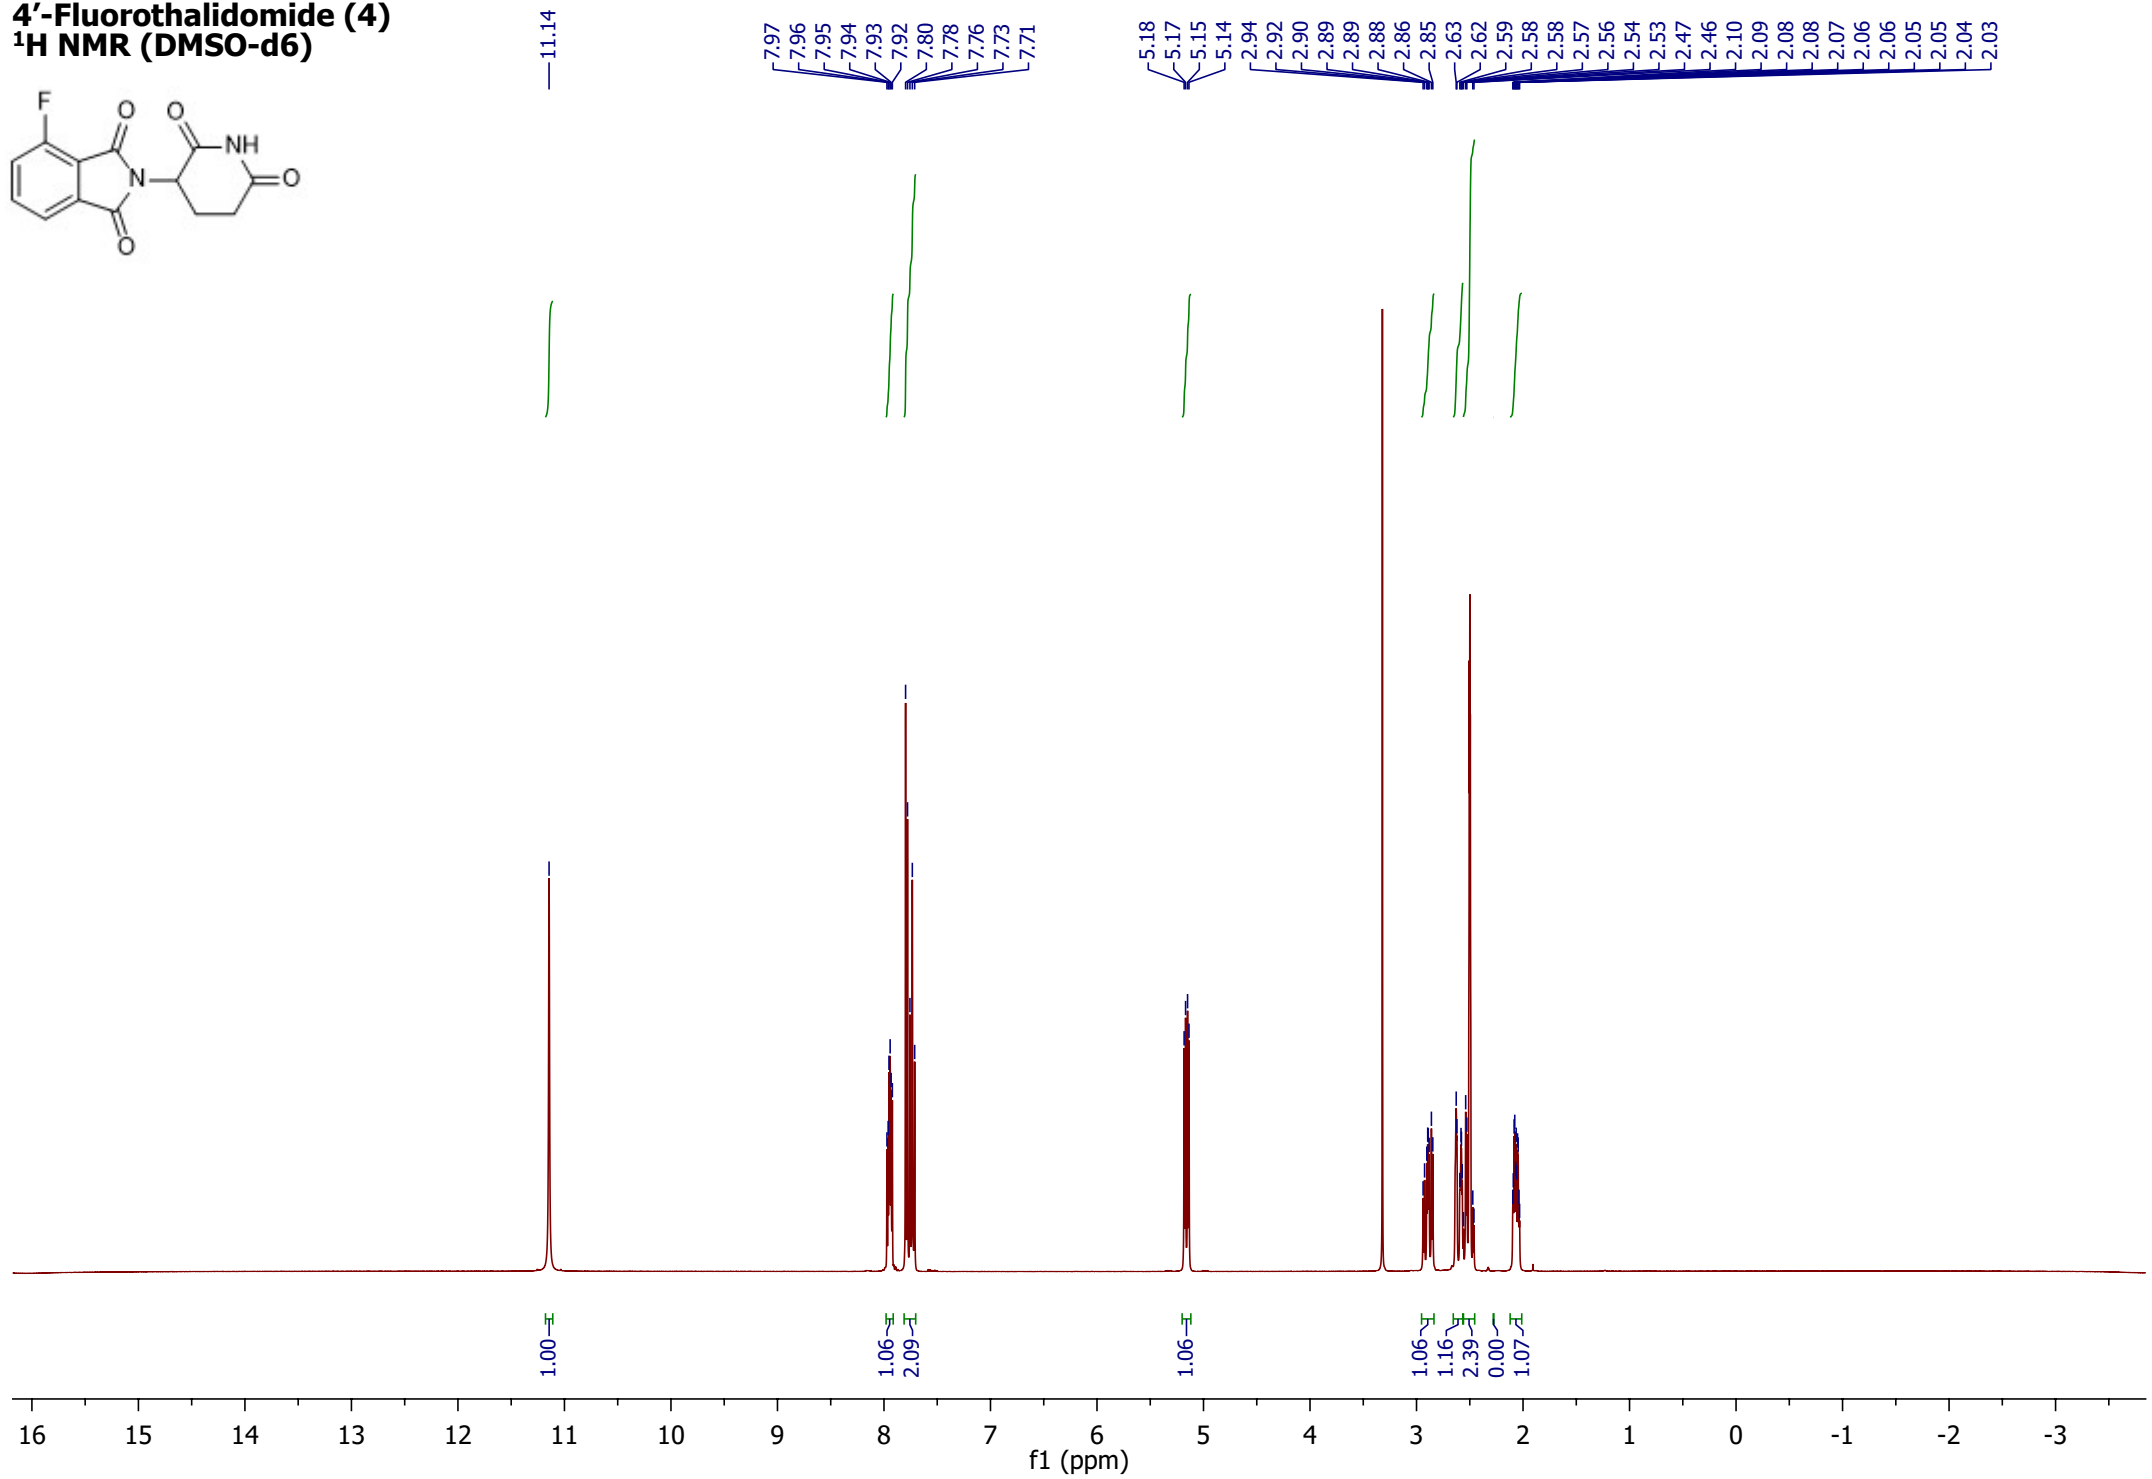

# 4'-Fluorothalidomide (4)

<sup>13</sup>C NMR (DMSO-d6)

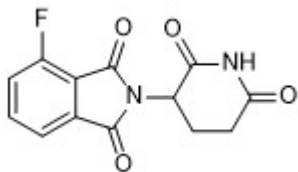

172.72  
169.67  
166.11  
166.08  
163.96  
158.11  
155.50

138.09  
138.01  
133.45  
123.09  
122.90  
120.05  
120.02  
117.09  
116.97

49.08  
39.94  
39.73  
39.52  
39.31  
38.89  
21.83

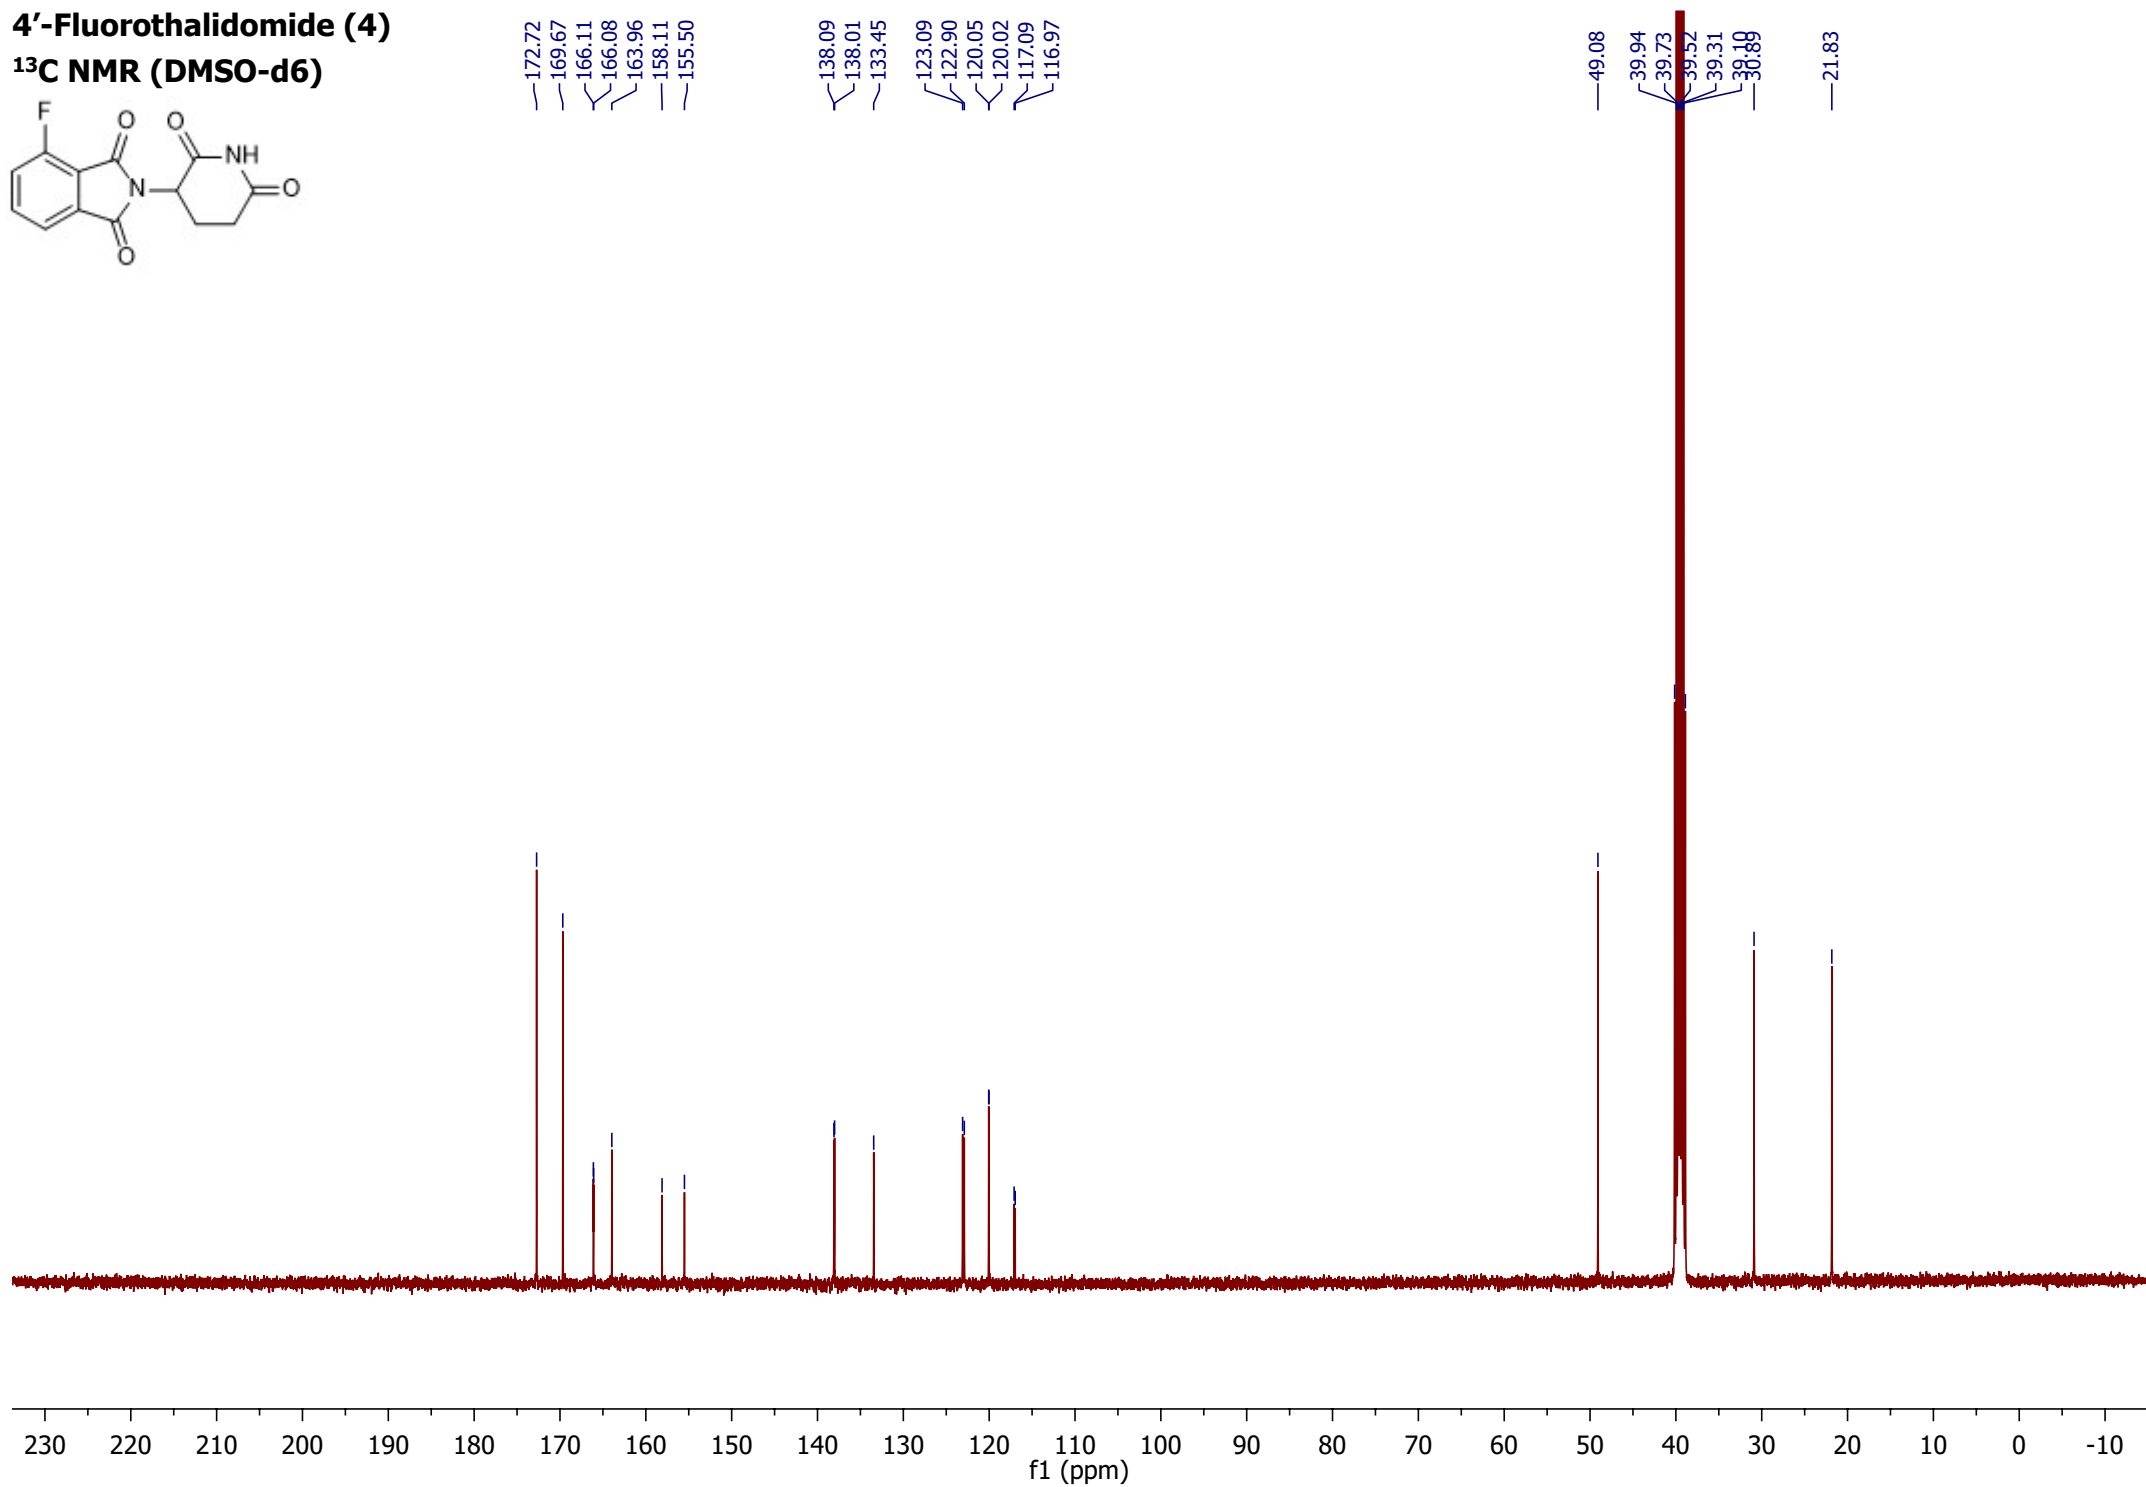

**5'-Fluorothalidomide (5)**  
**<sup>1</sup>H NMR (DMSO-d6)**

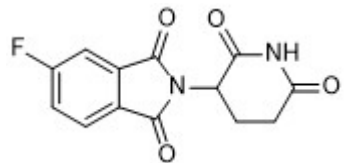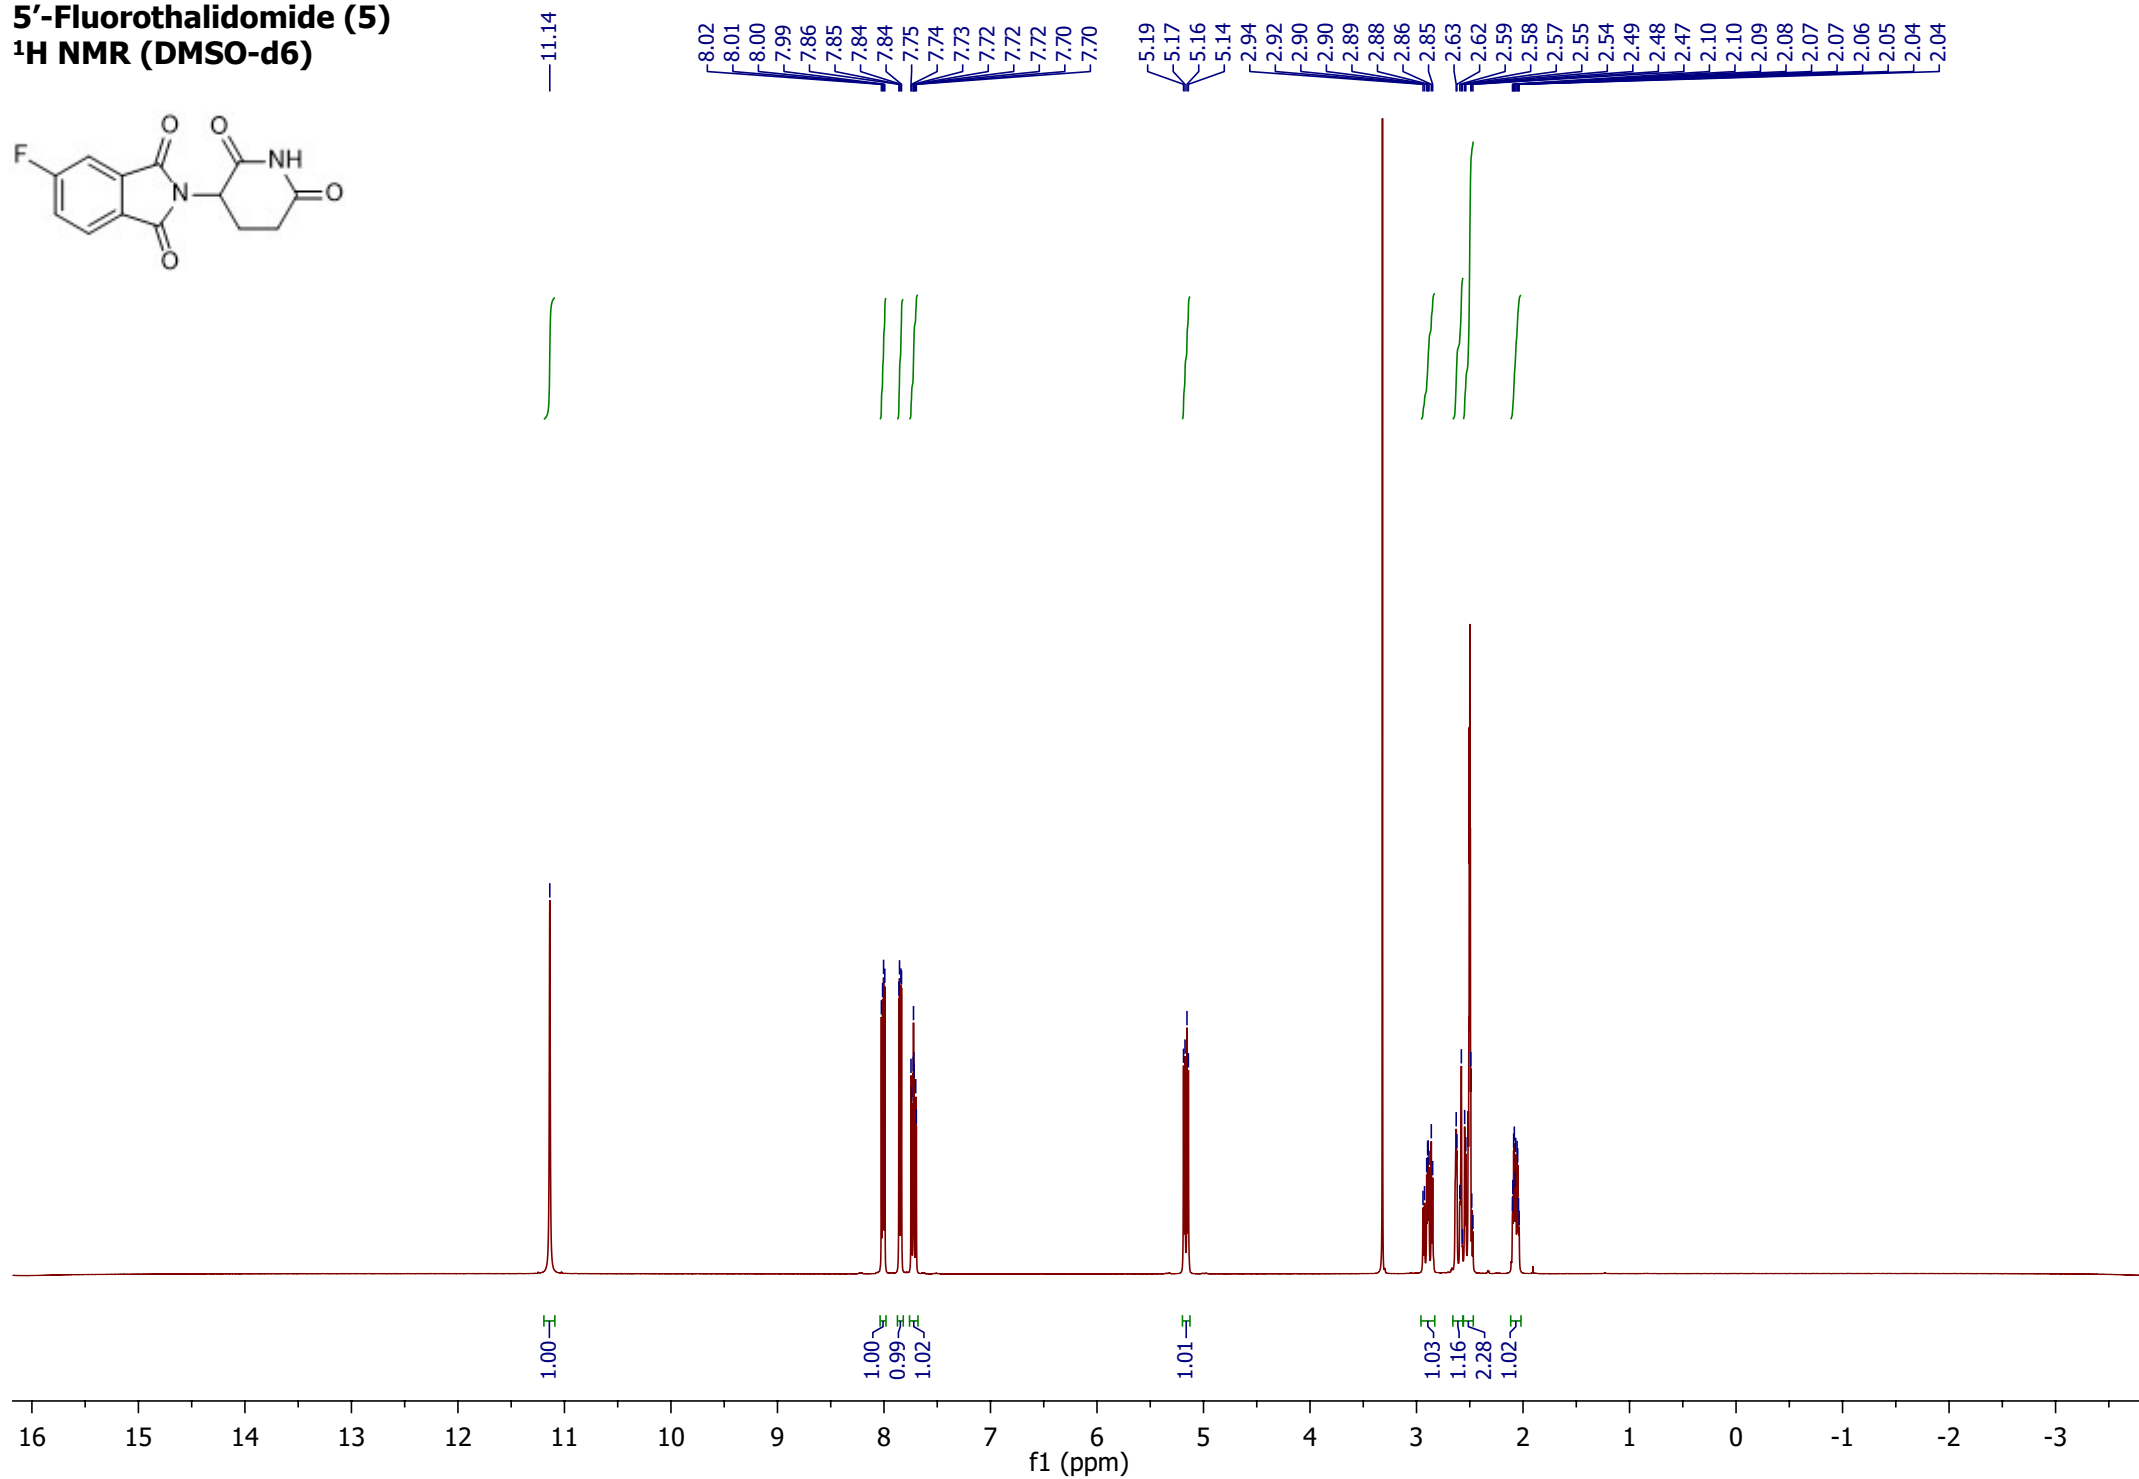

**5'-Fluorothalidomide (5)**  
**<sup>13</sup>C NMR (DMSO-d6)**

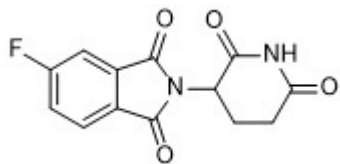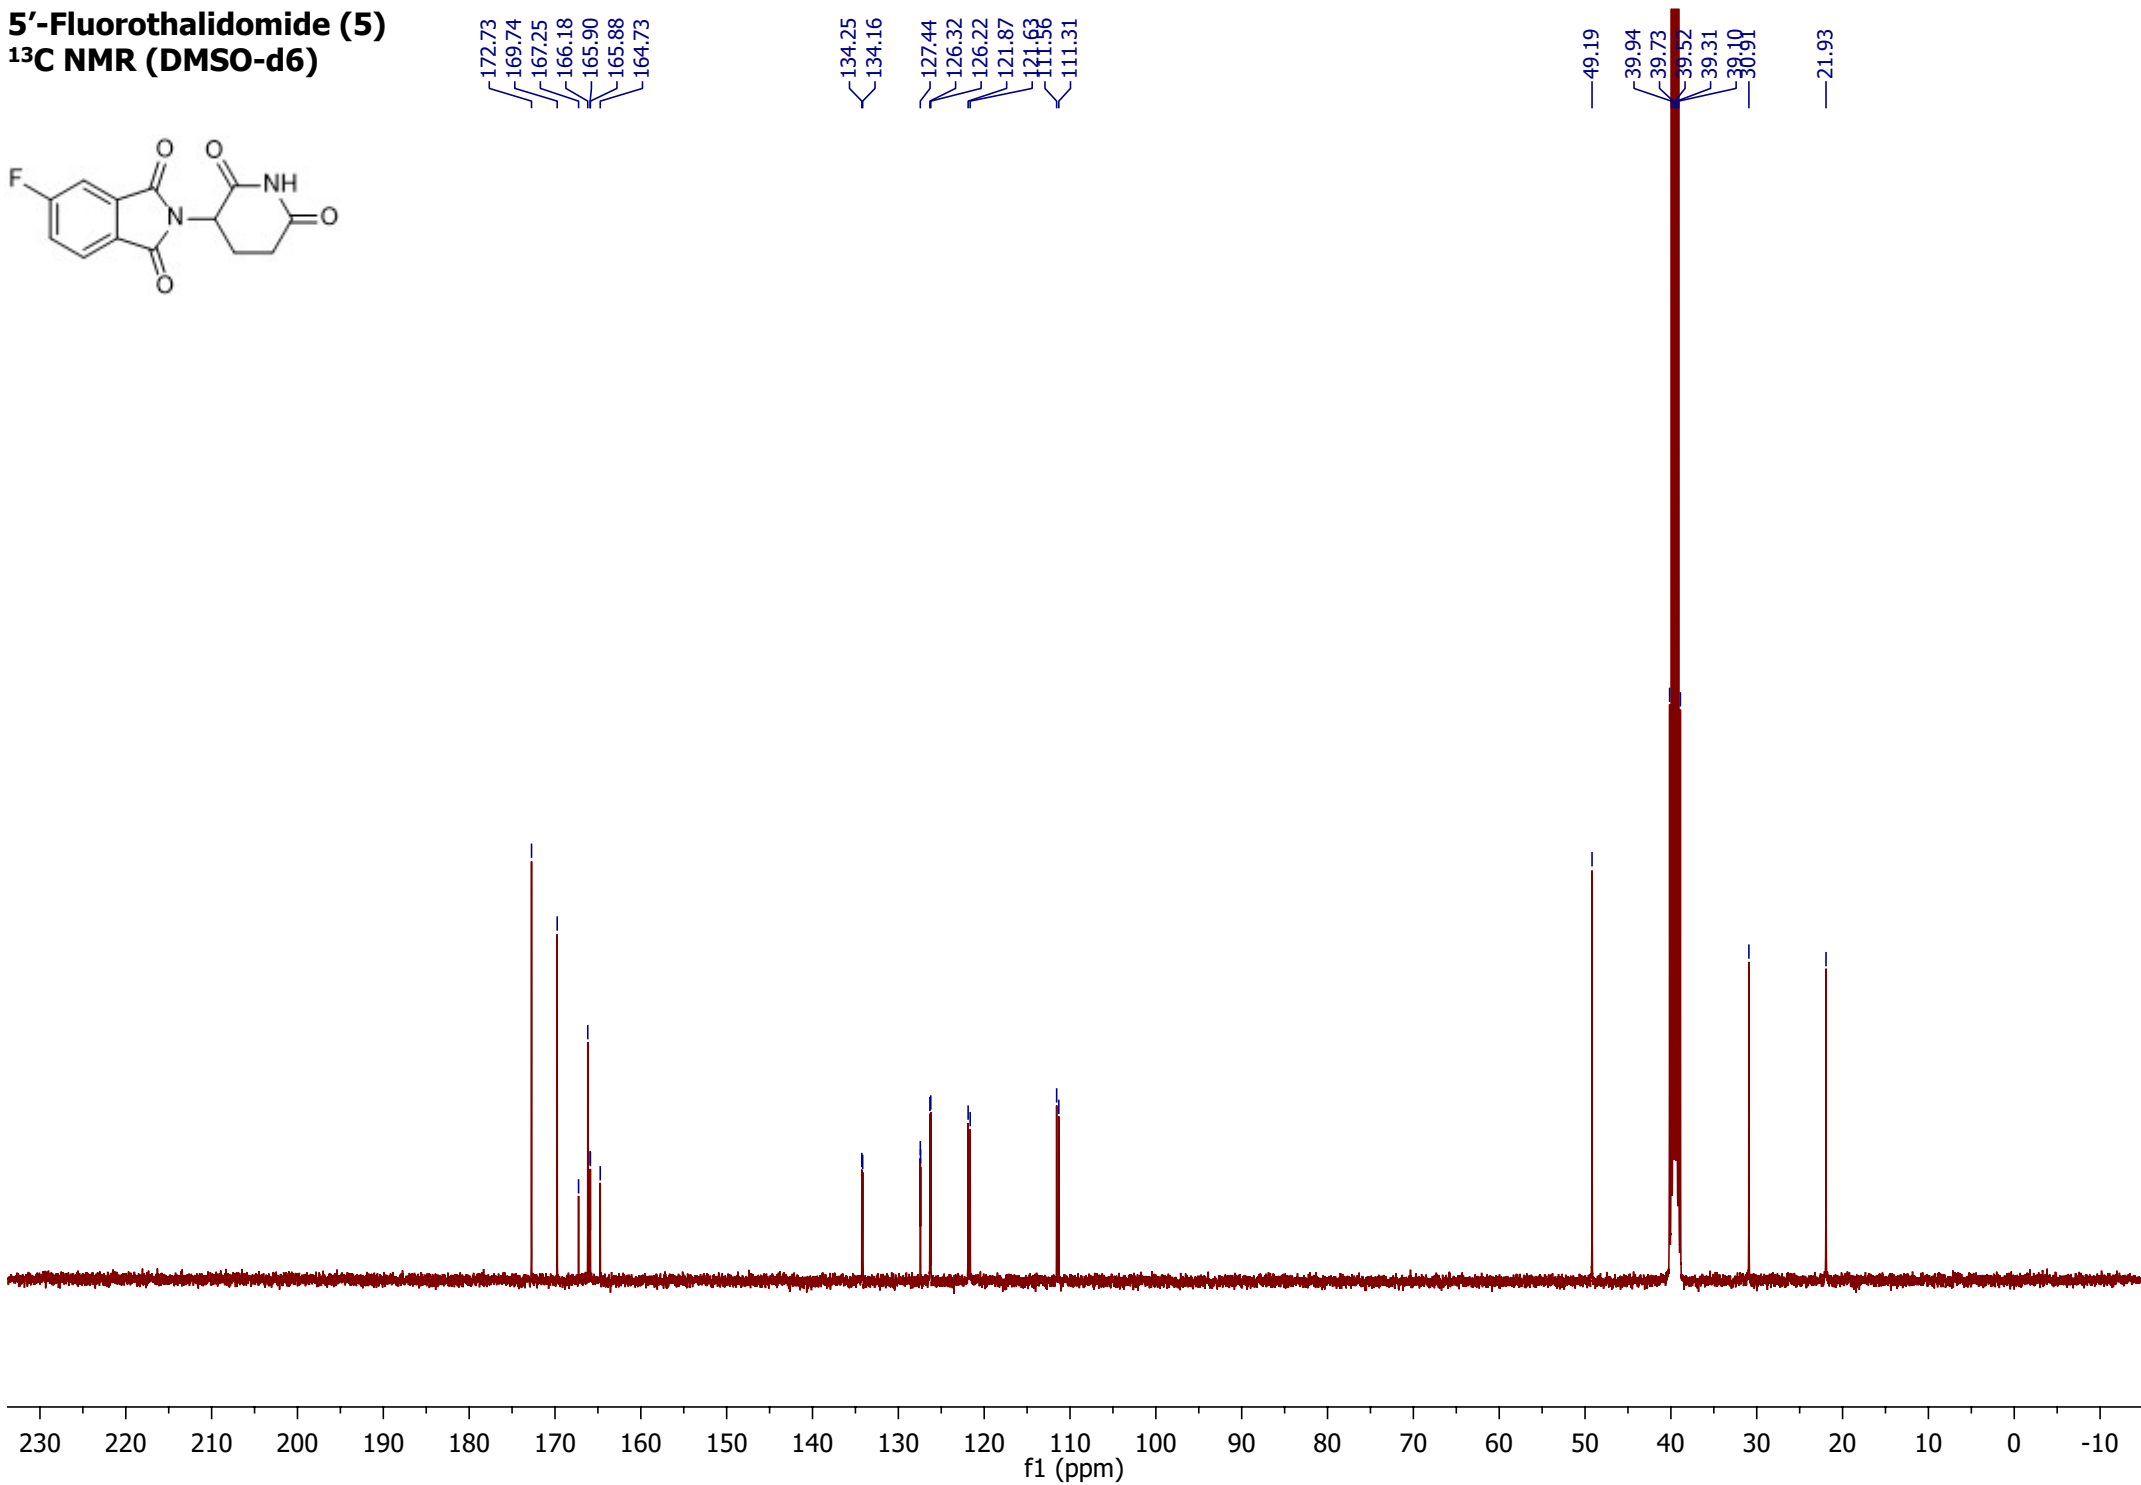

**4'-Hydroxythalidomide (6)**  
**<sup>1</sup>H NMR (DMSO-d6)**

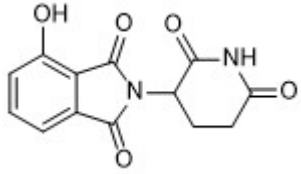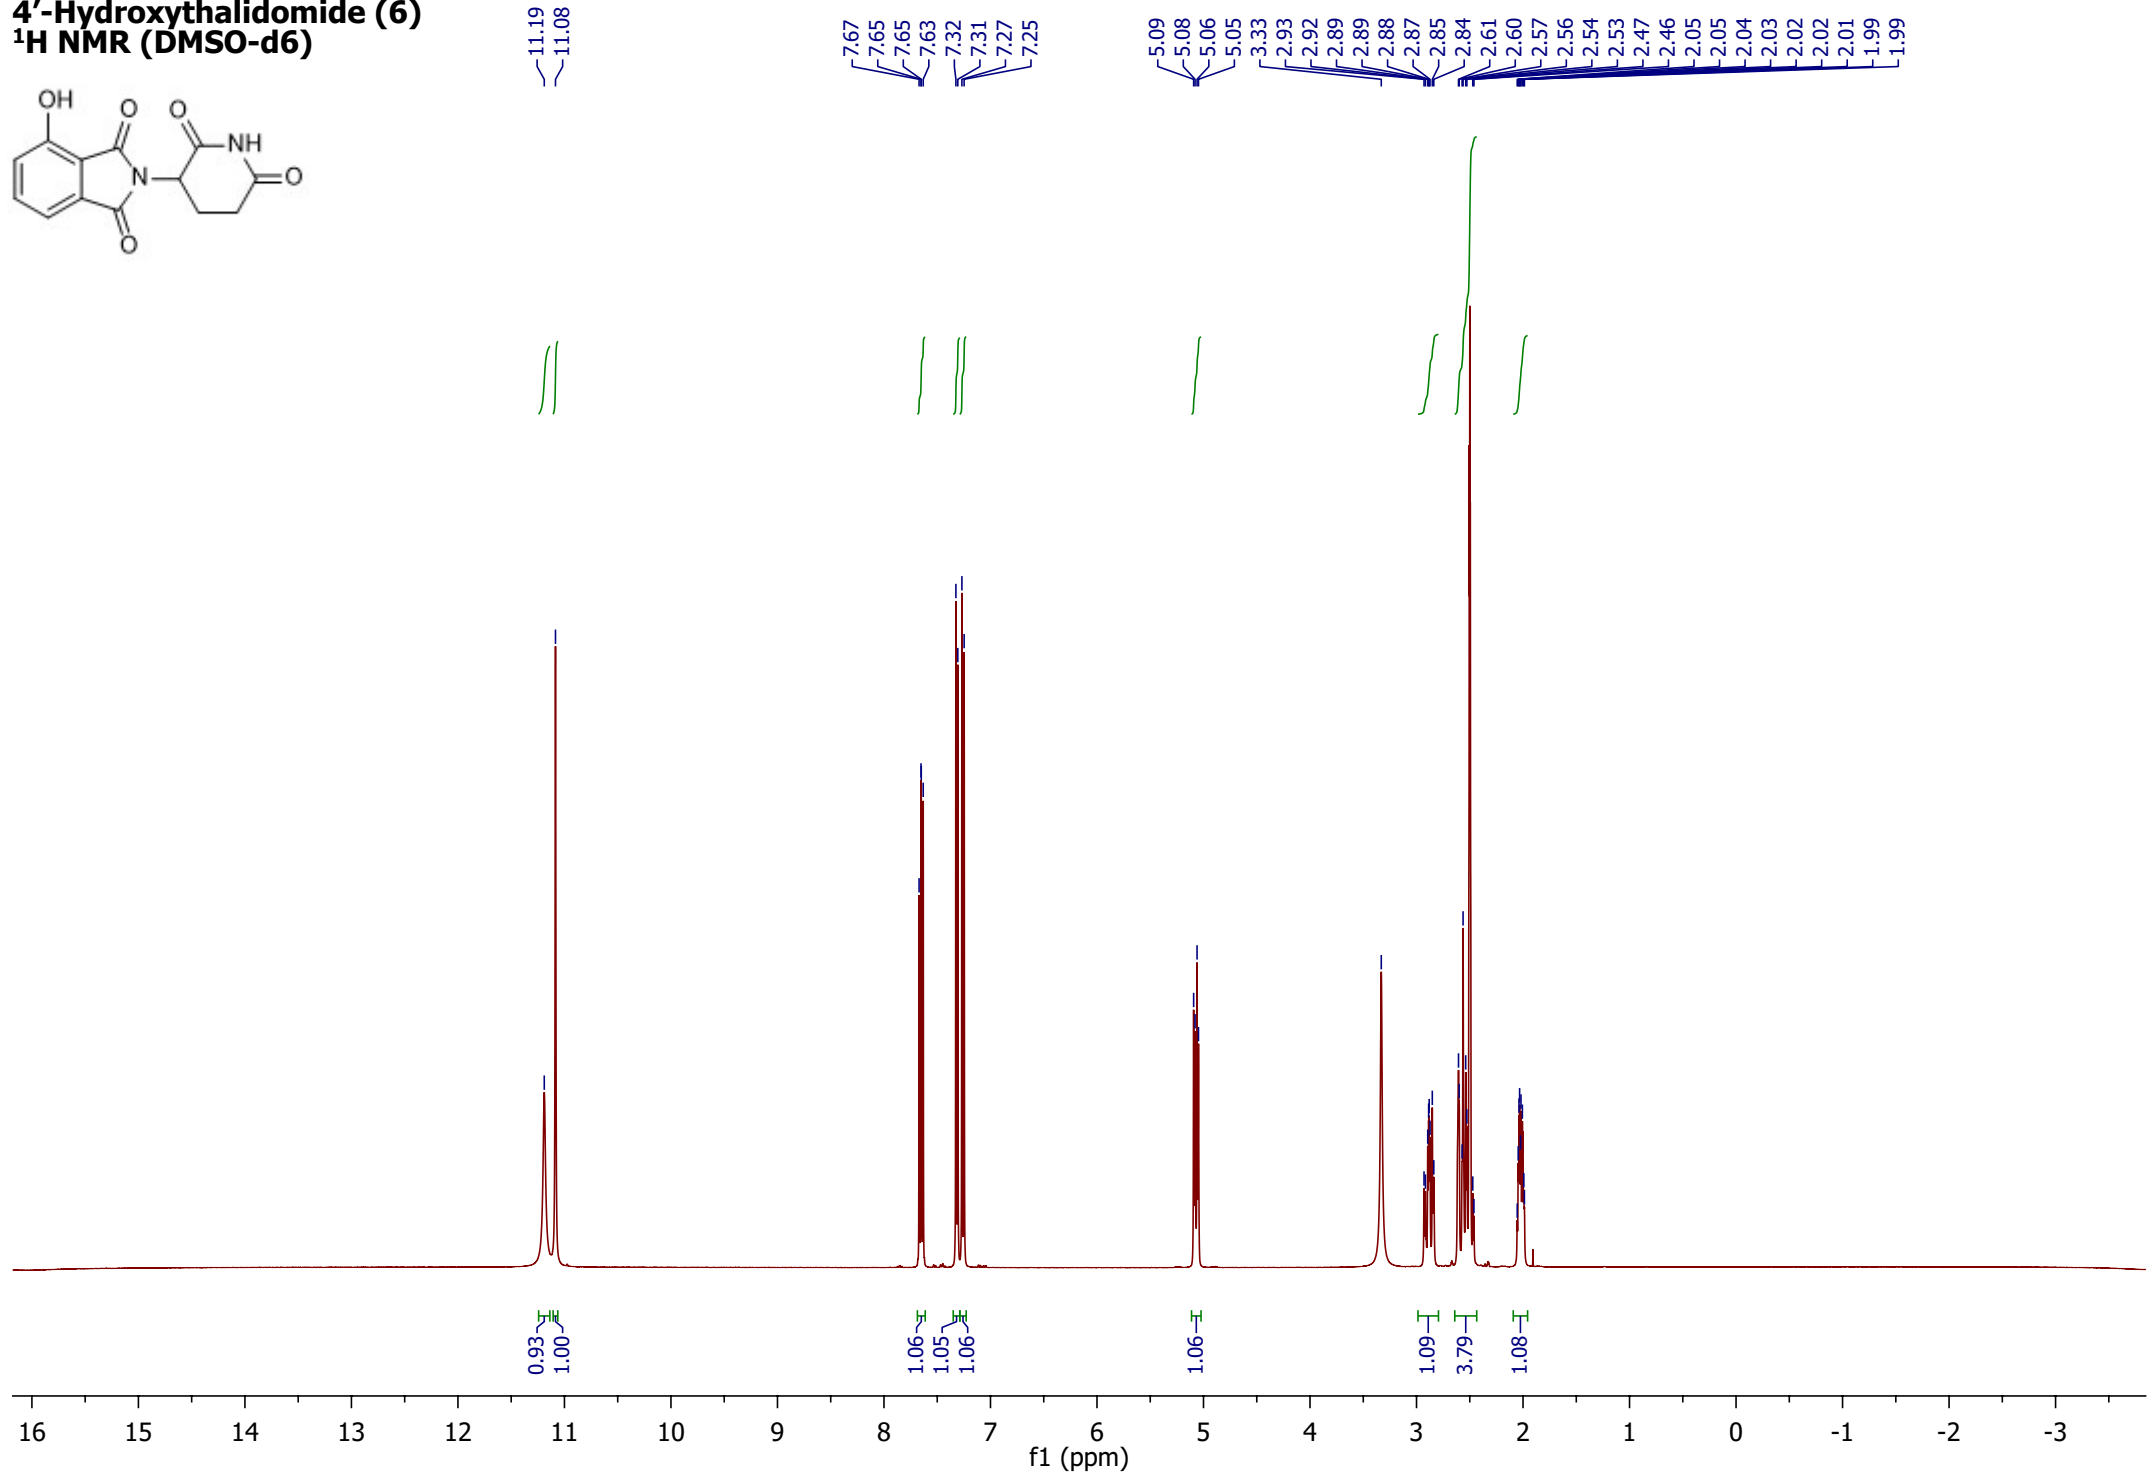



# 4'-Hydroxythalidomide (6)

<sup>13</sup>C NMR (DMSO-d6)

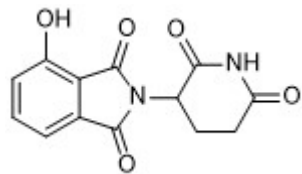

—172.81  
—170.02  
—167.03  
—165.82  
—155.49  
—136.38  
—133.15  
—123.57  
—114.36  
—114.27  
—48.63  
39.73  
39.52  
39.31  
38.98  
30.96  
—22.03

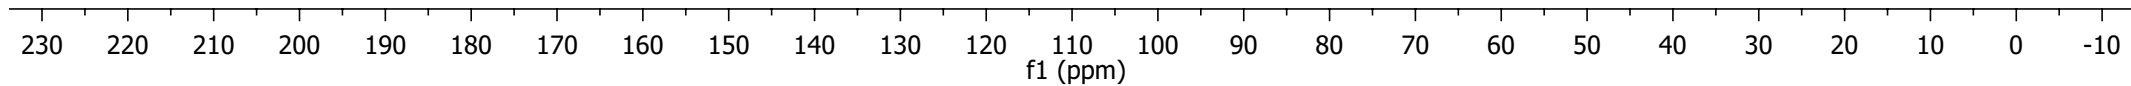

**2-[2-(2,6-dioxo-3-piperidyl)-1,3-dioxo-isoindolin-4-yl]oxyacetic acid (7)**  
**<sup>1</sup>H NMR (DMSO-d6)**

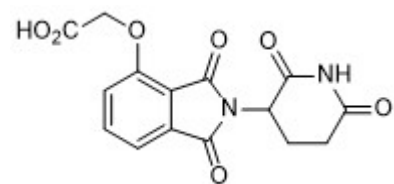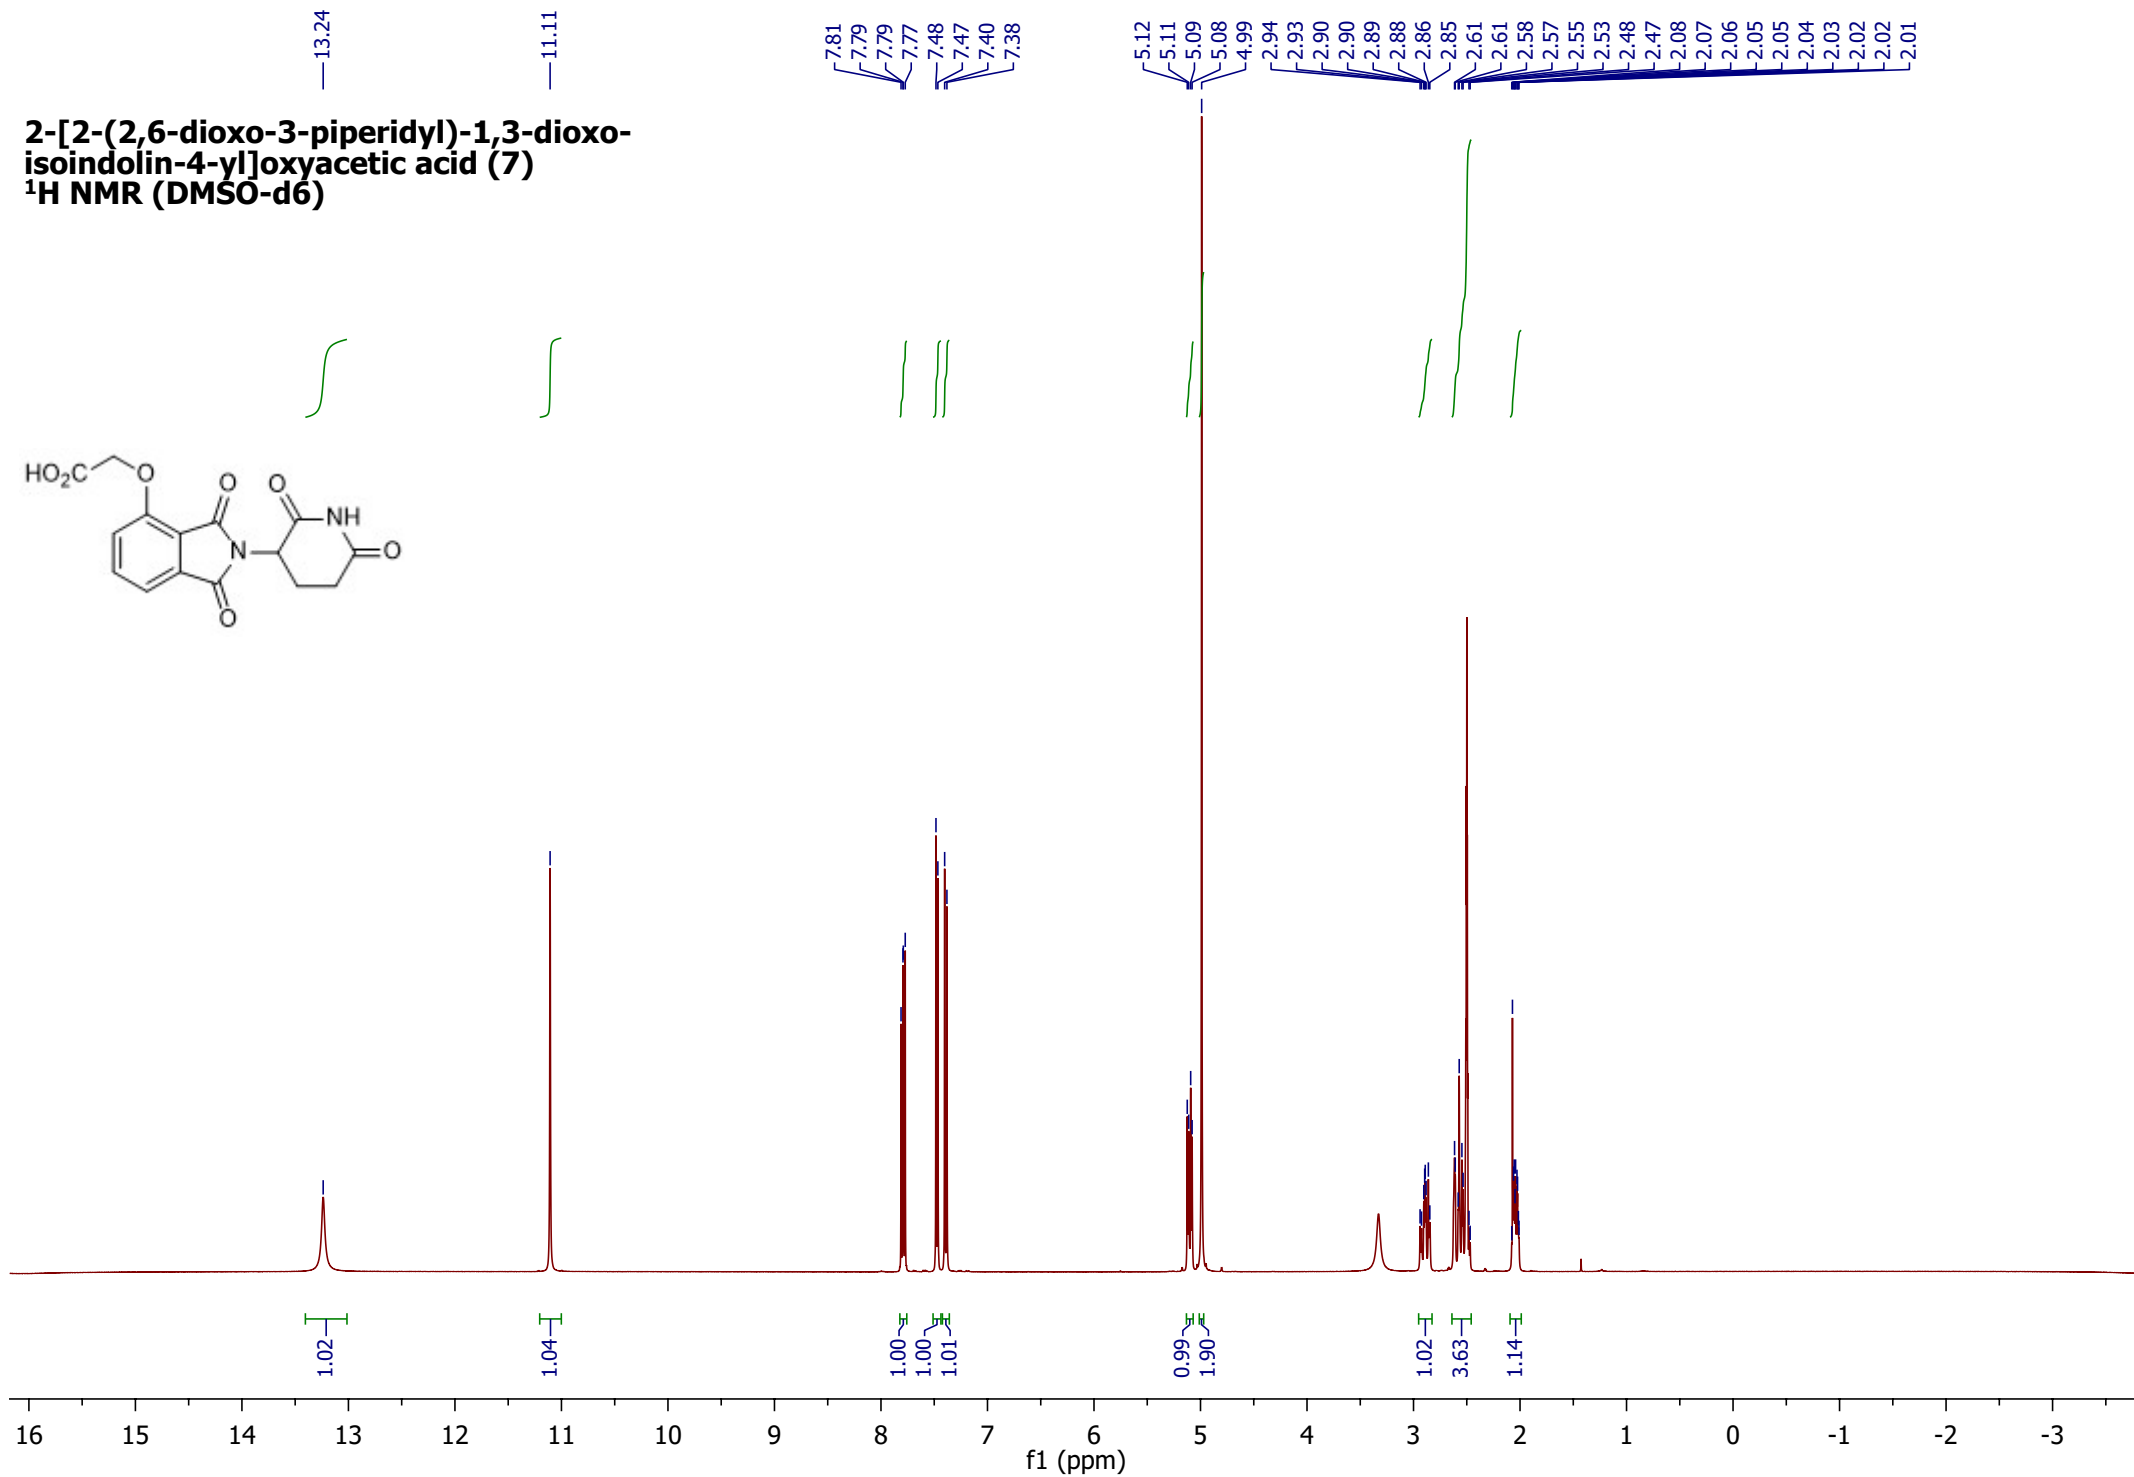

**2-[2-(2,6-dioxo-3-piperidyl)-1,3-dioxo-isoindolin-4-yl]oxyacetic acid (7)**  
**<sup>13</sup>C NMR (DMSO-d6)**

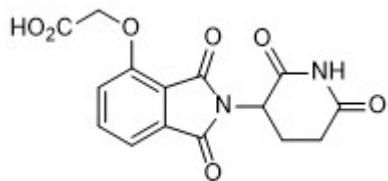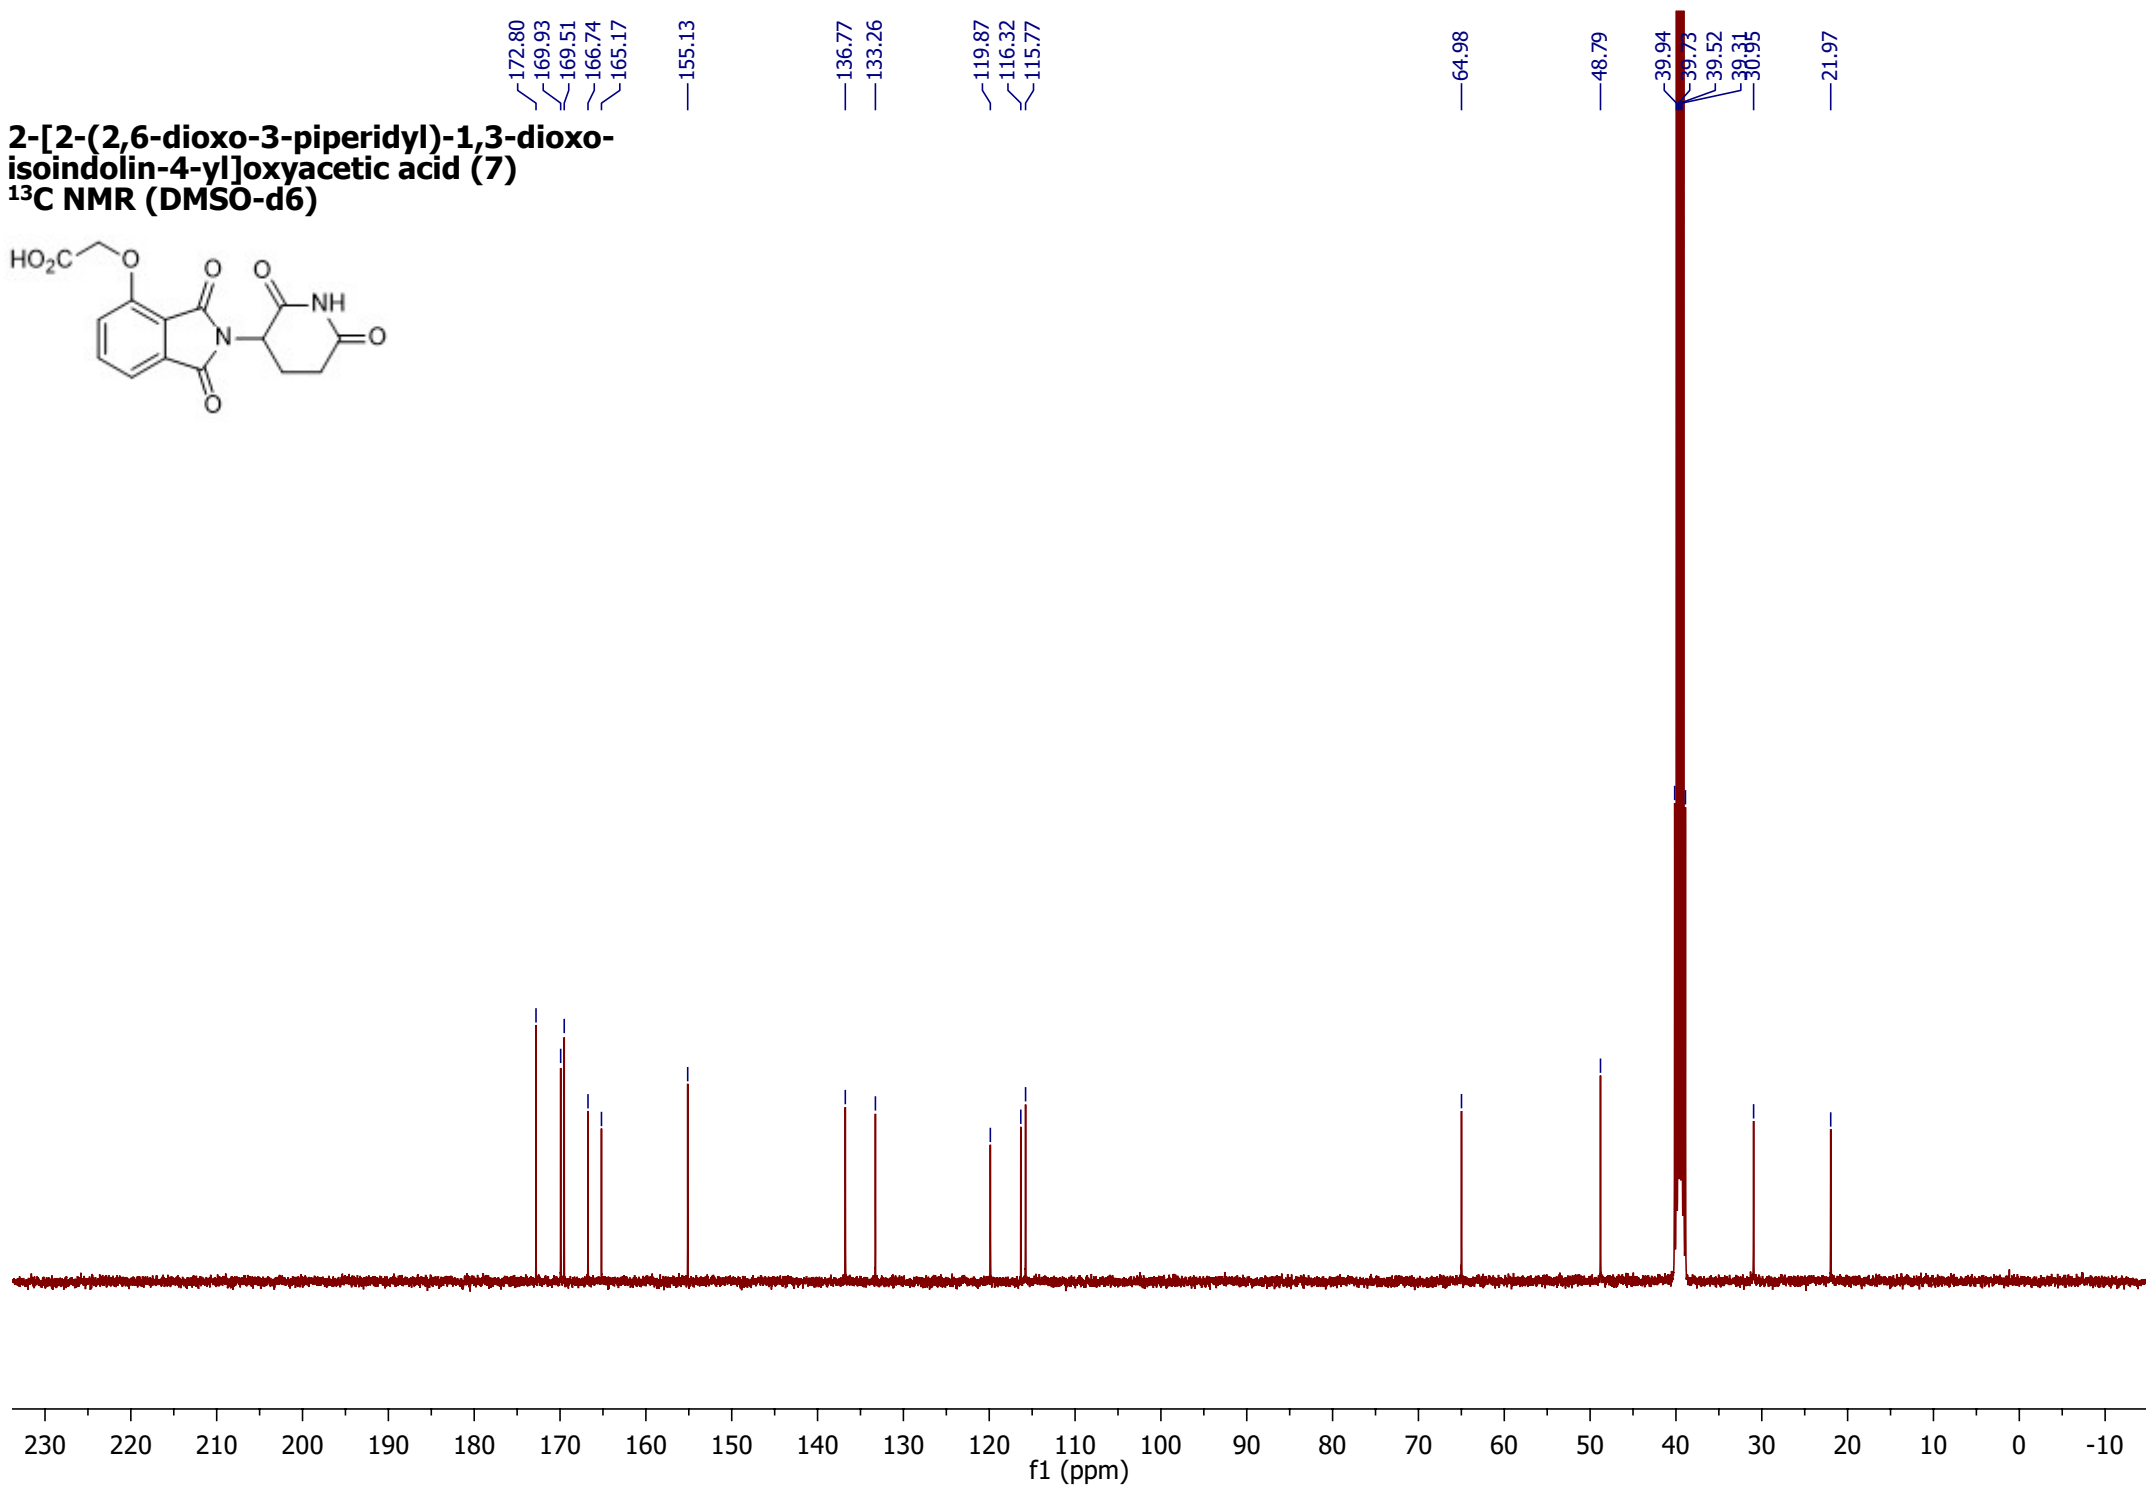

***tert*-Butyl (4-bromobenzyl)carbamate (9)**  
**<sup>1</sup>H NMR (CDCl<sub>3</sub>)**

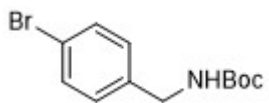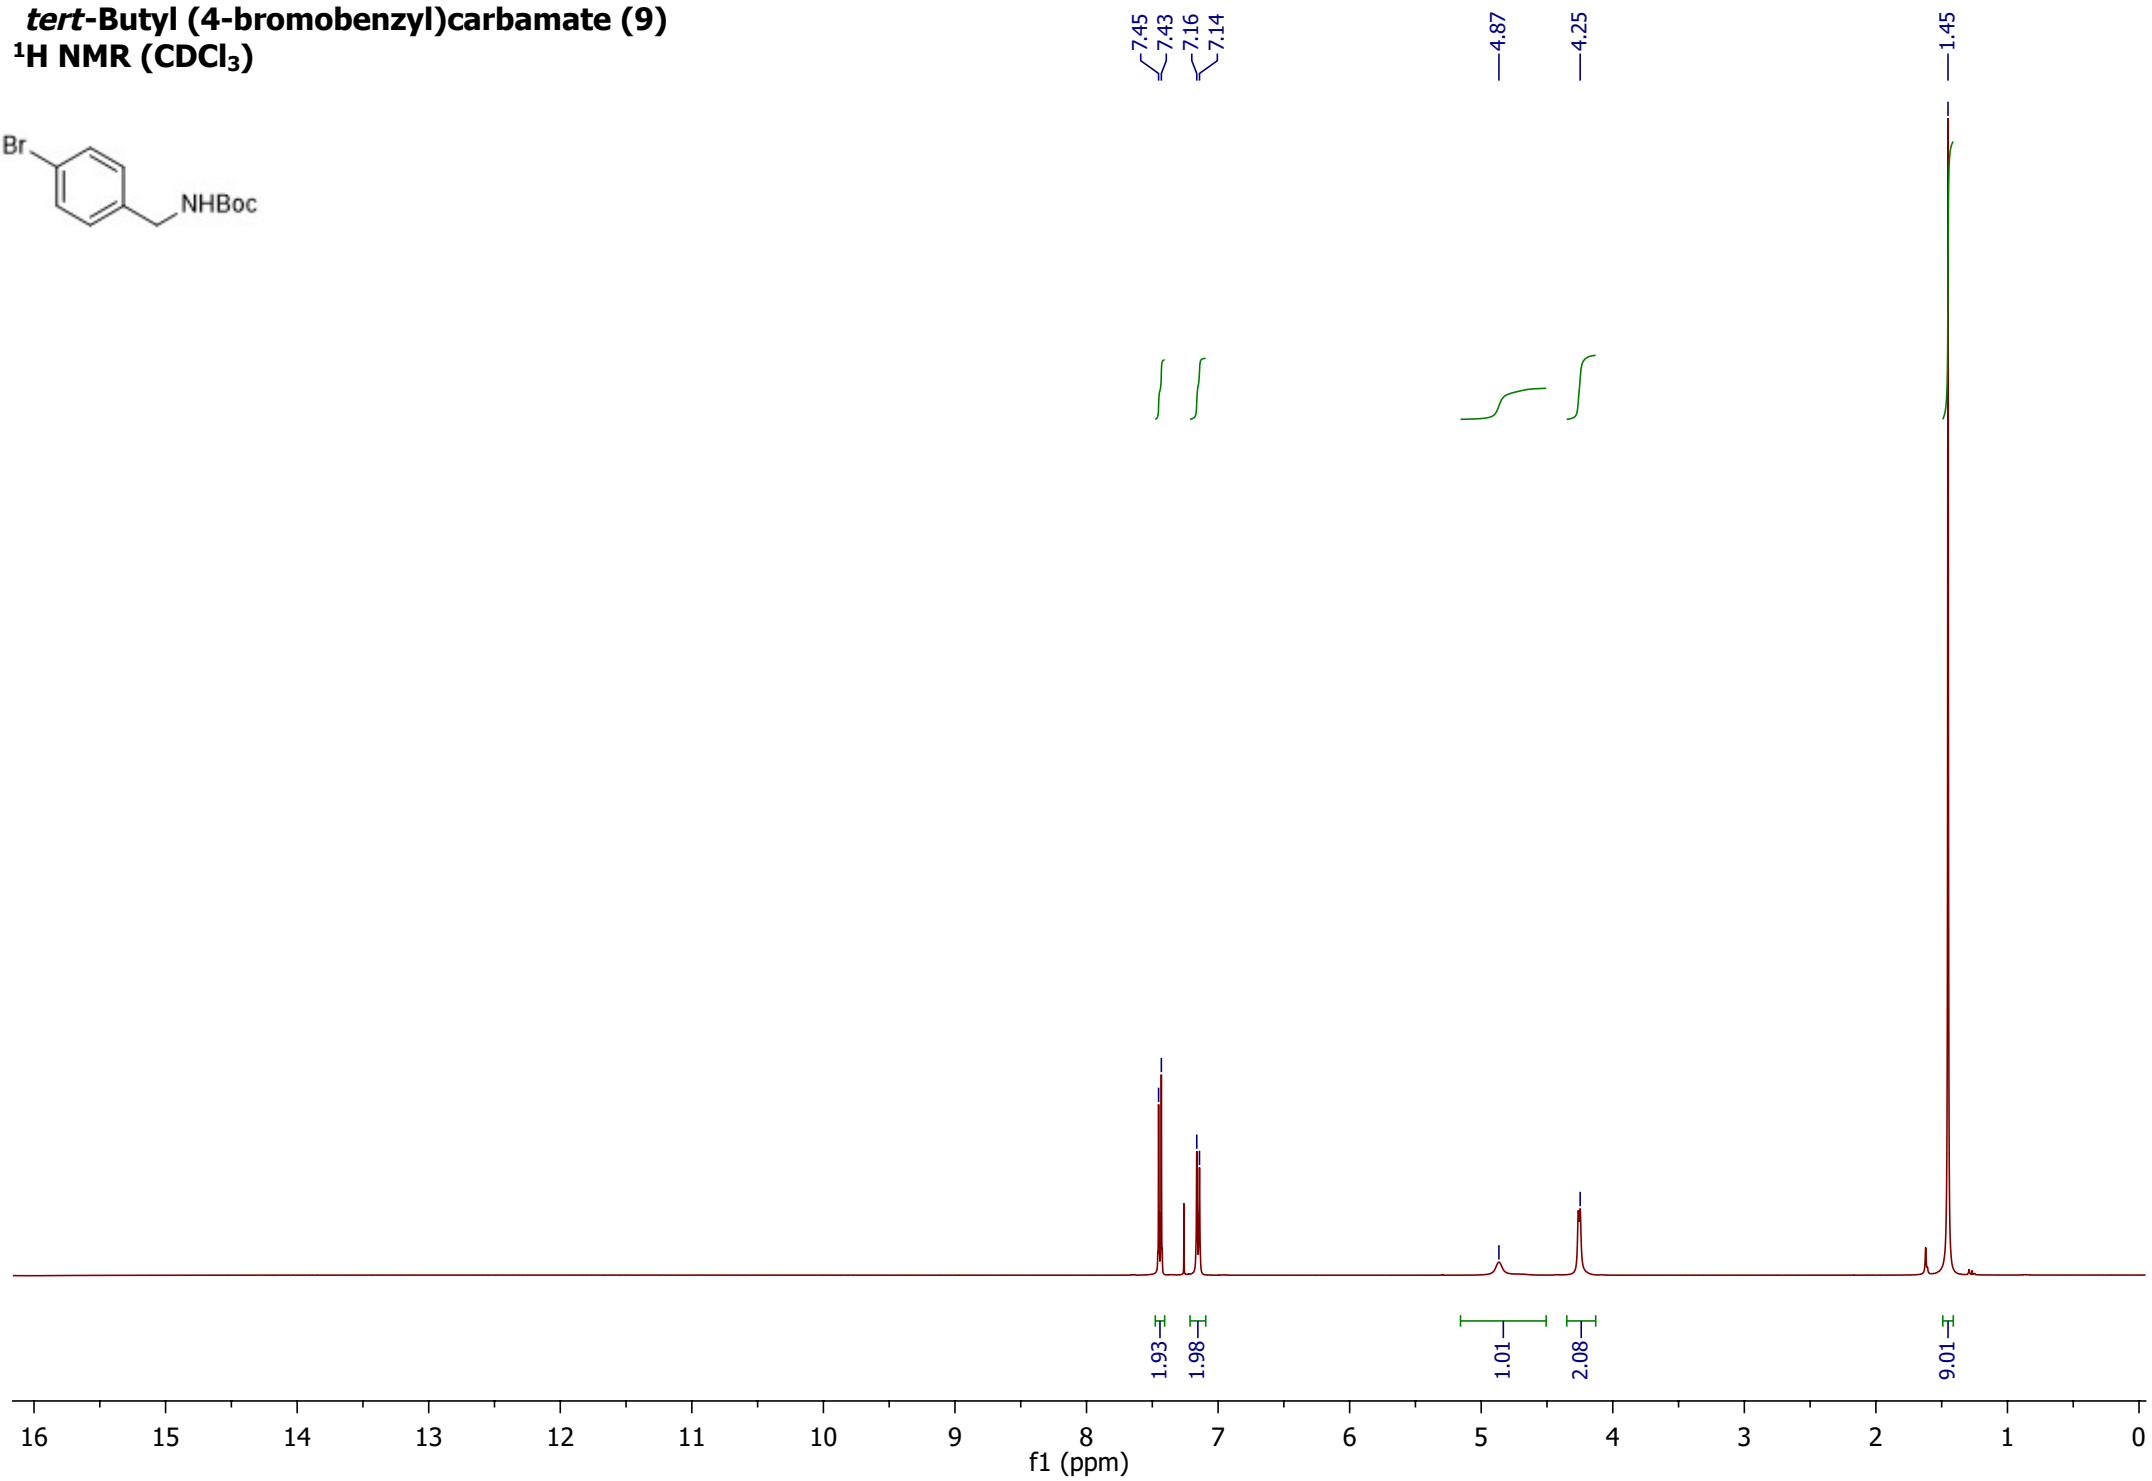

***tert*-Butyl  
(4-(4-methylthiazol-5-yl)benzyl)carbamate  
(10) <sup>1</sup>H NMR (CDCl<sub>3</sub>)**

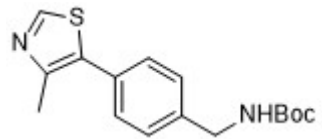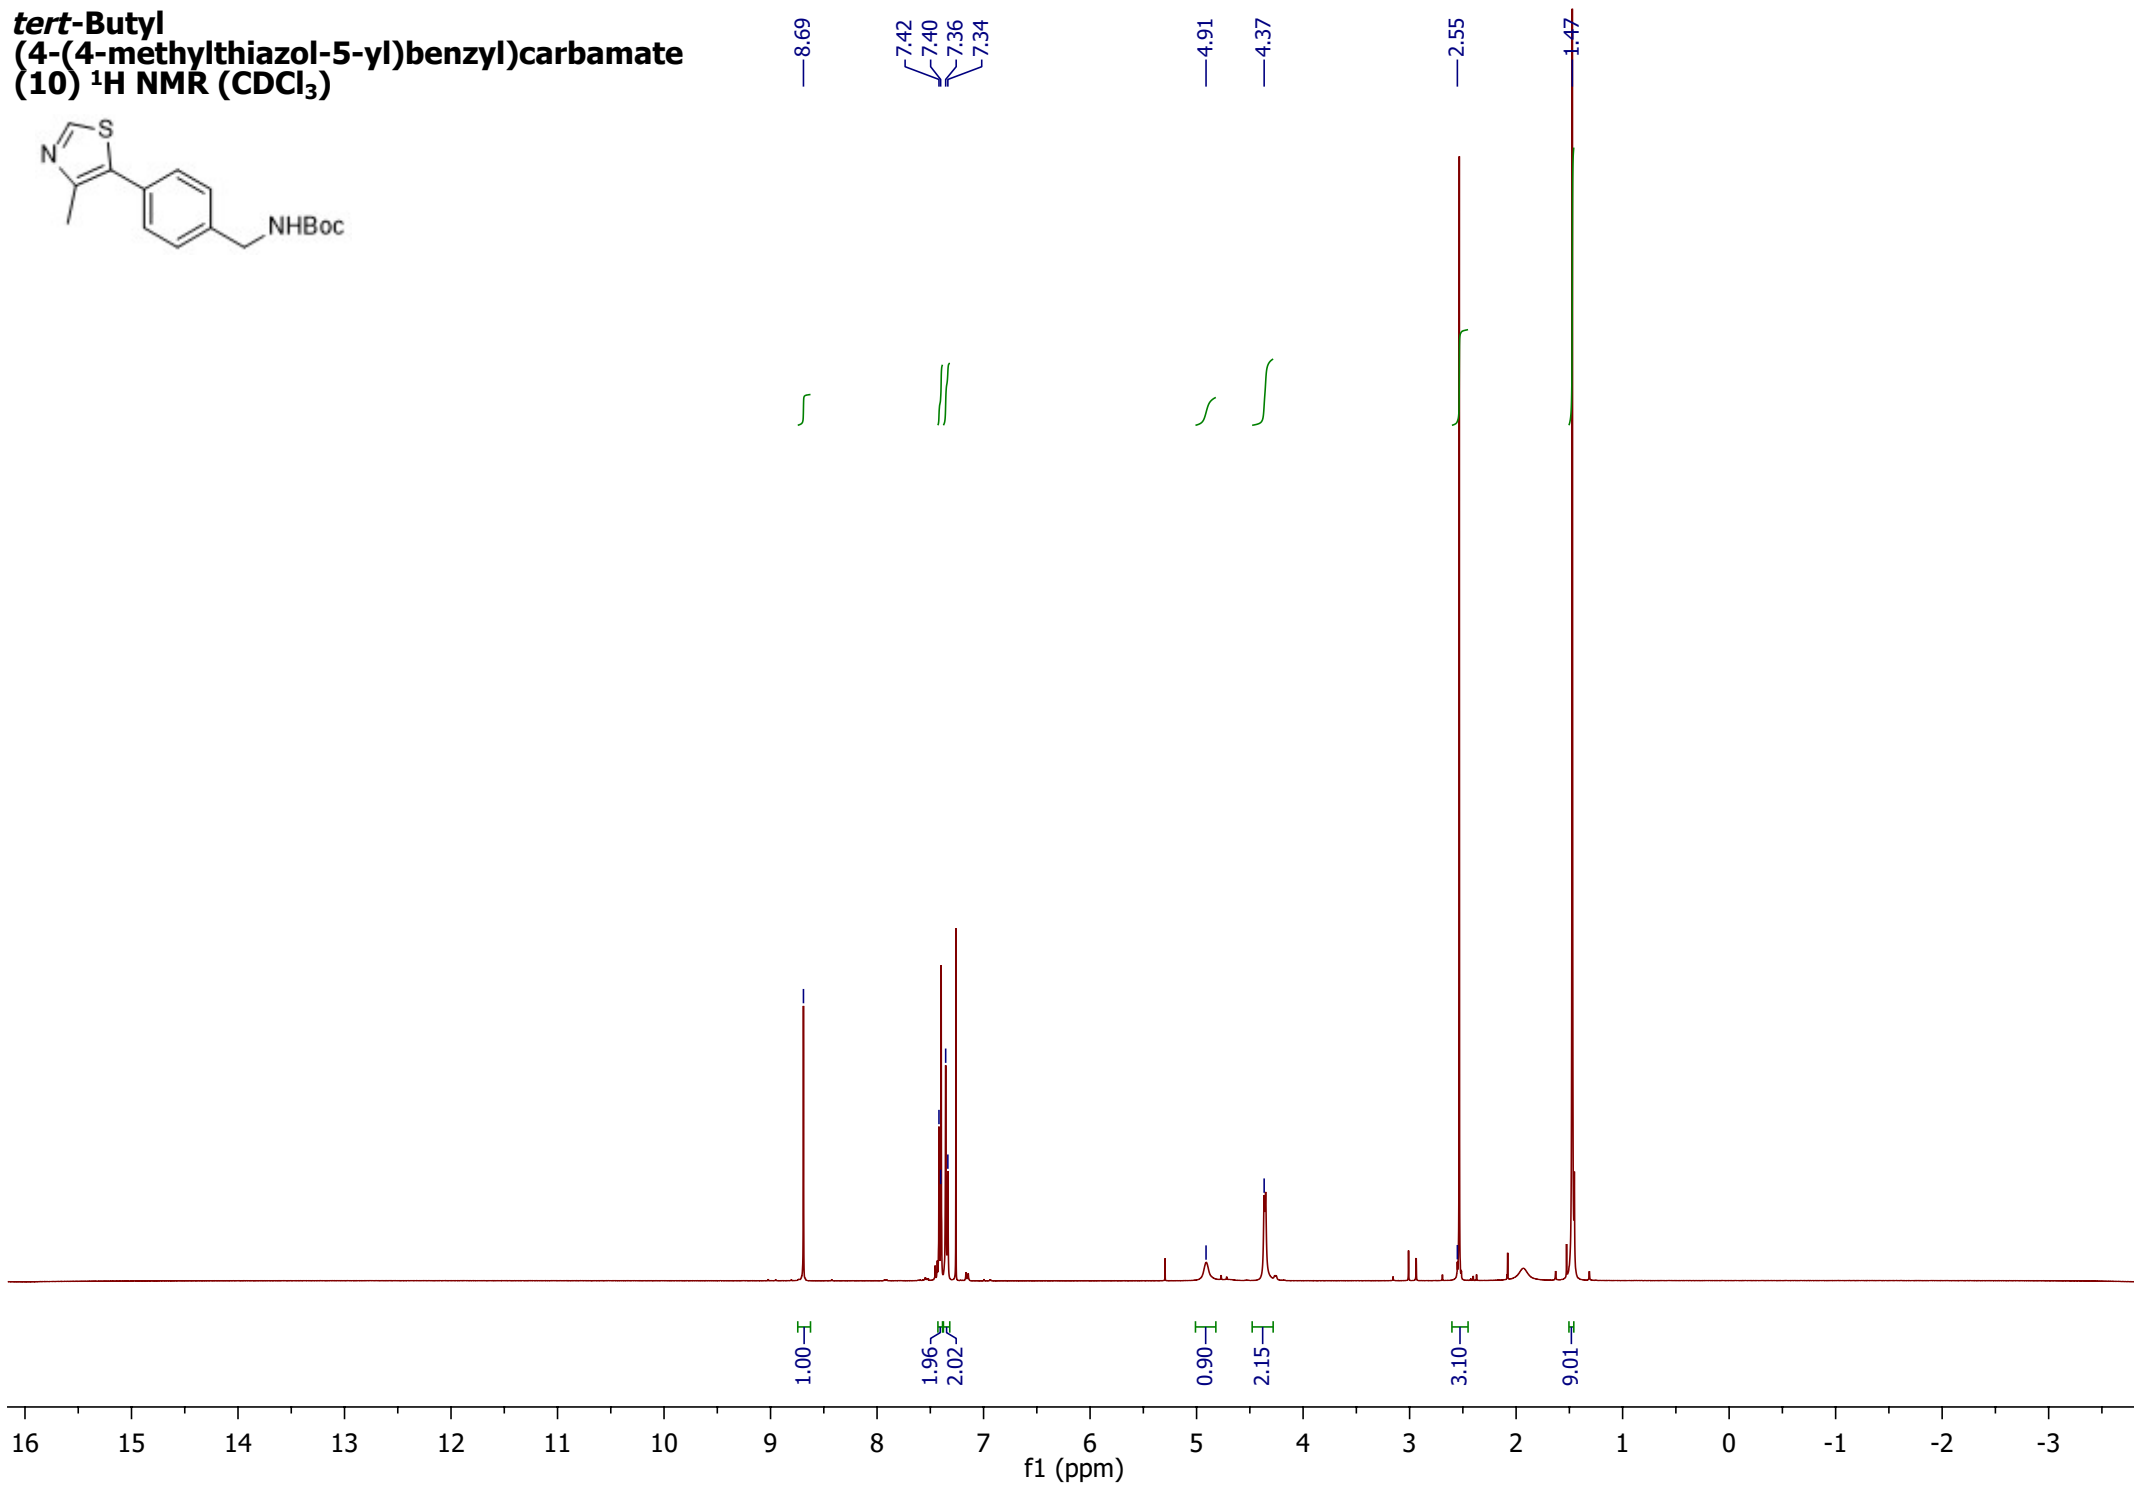

**4-(4-Methylthiazol-5-yl)benzylamine  
dihydrochloride (11)**  
**<sup>1</sup>H NMR (DMSO-d<sub>6</sub>)**

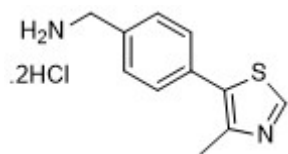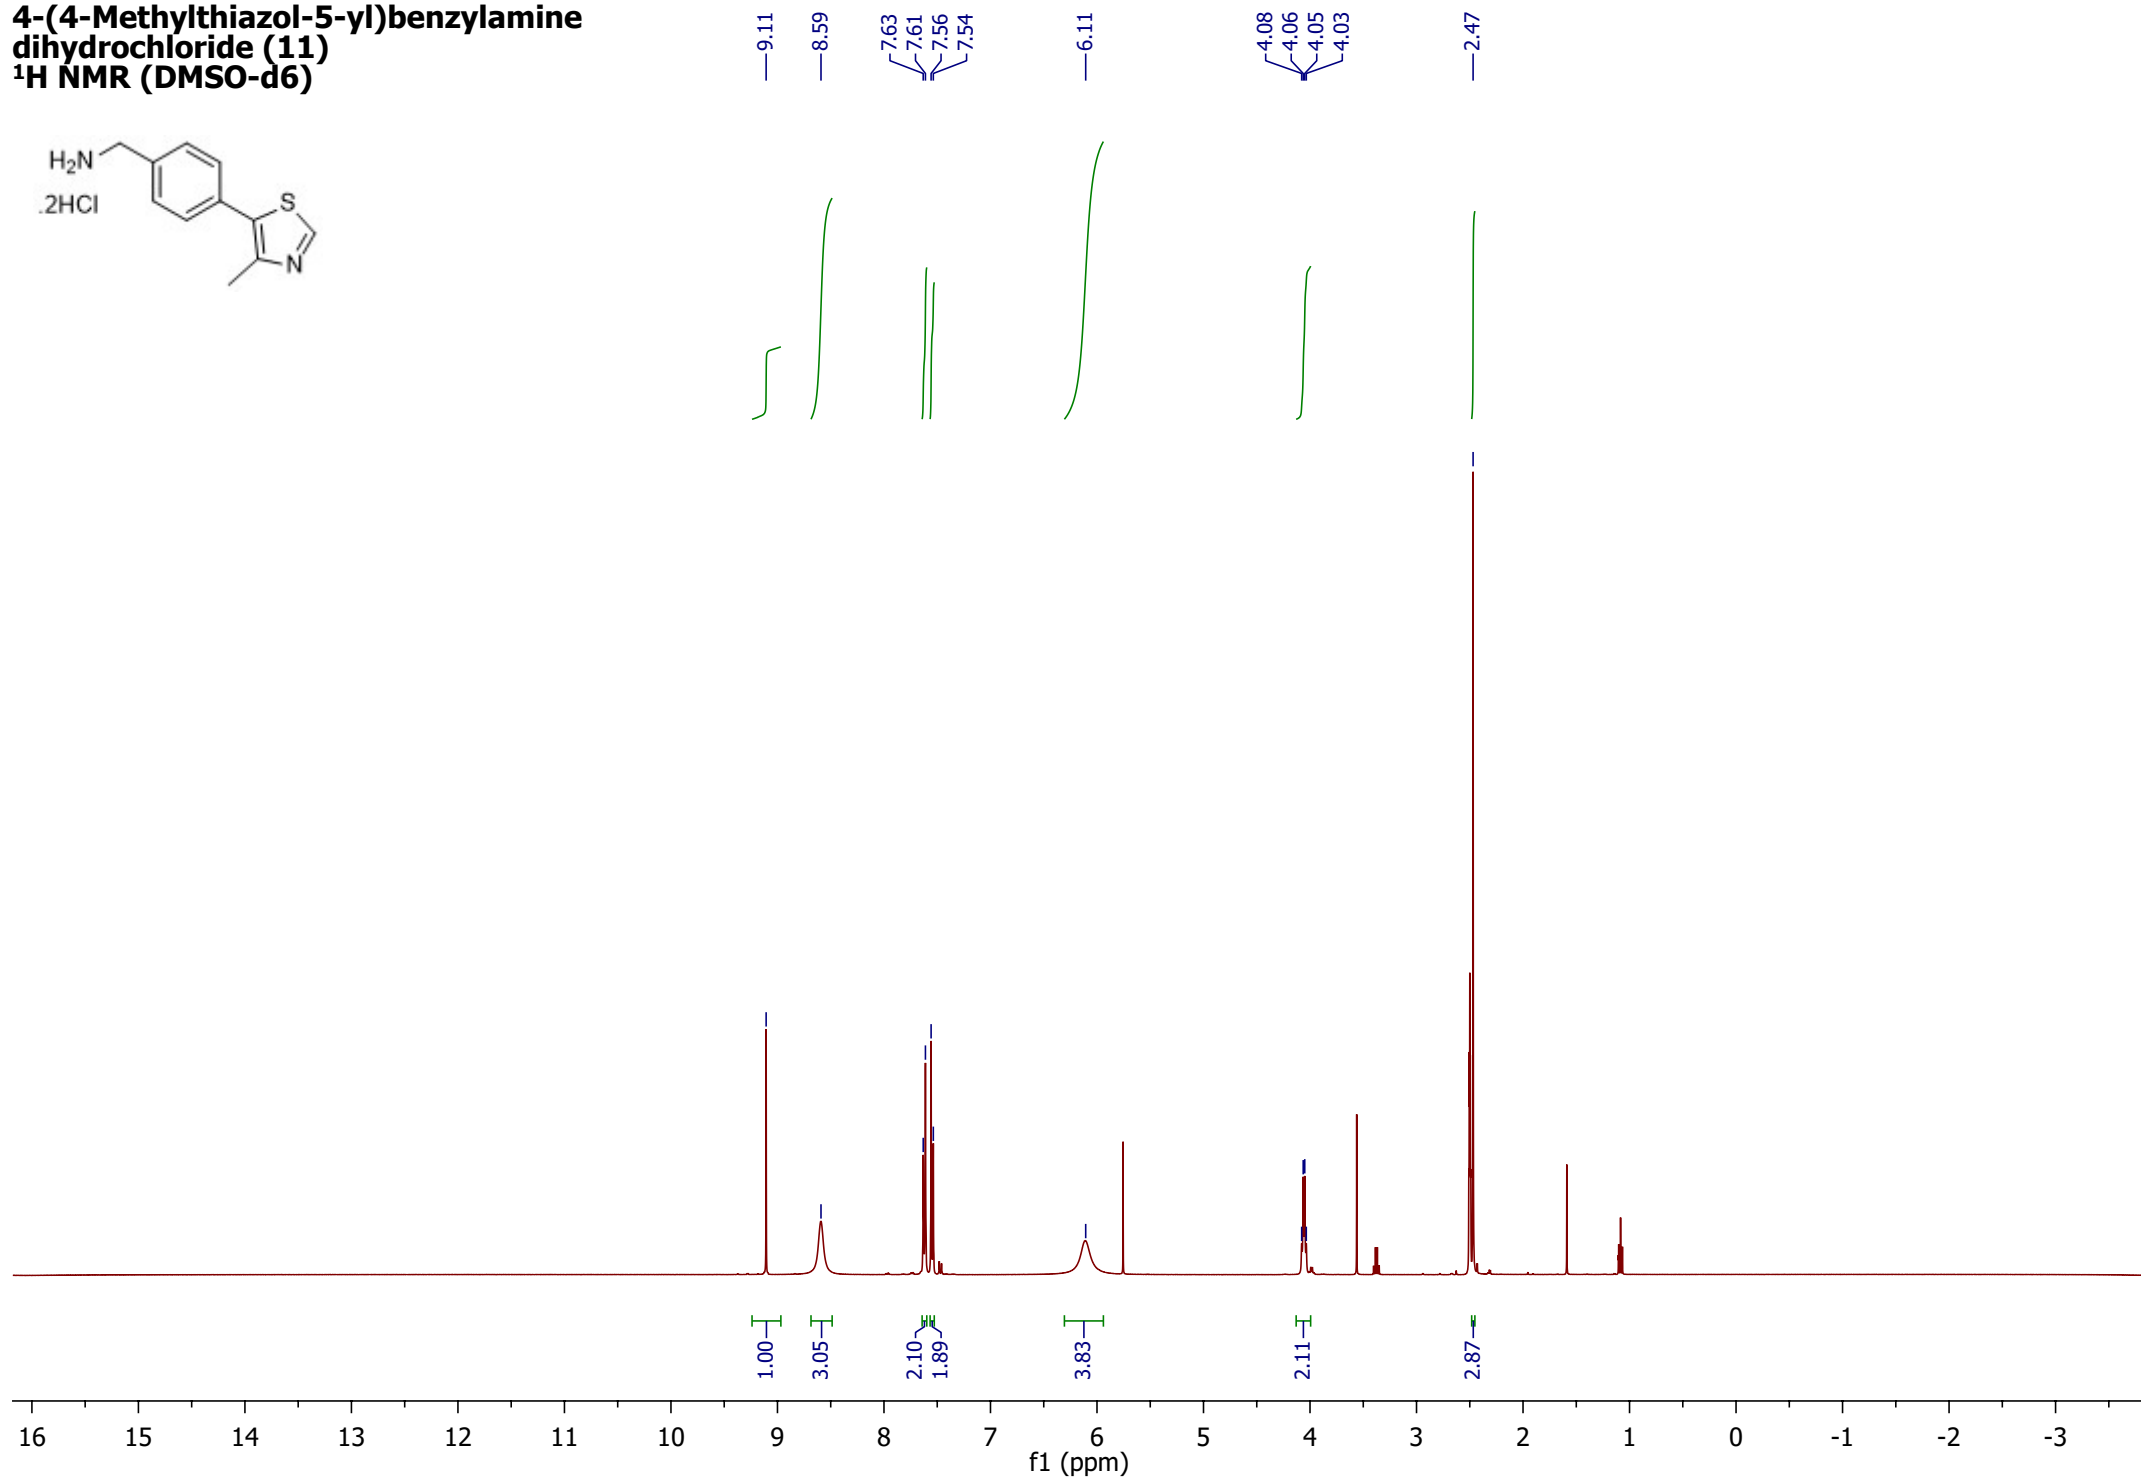

**(2S,4R)-4-Hydroxy-N-((4-(4-methylthiazol-5-yl)benzyl)pyrrolidine-2-carboxamide dihydrochloride (13)**  
**<sup>1</sup>H NMR (CD<sub>3</sub>OD)**

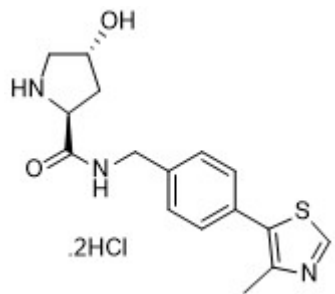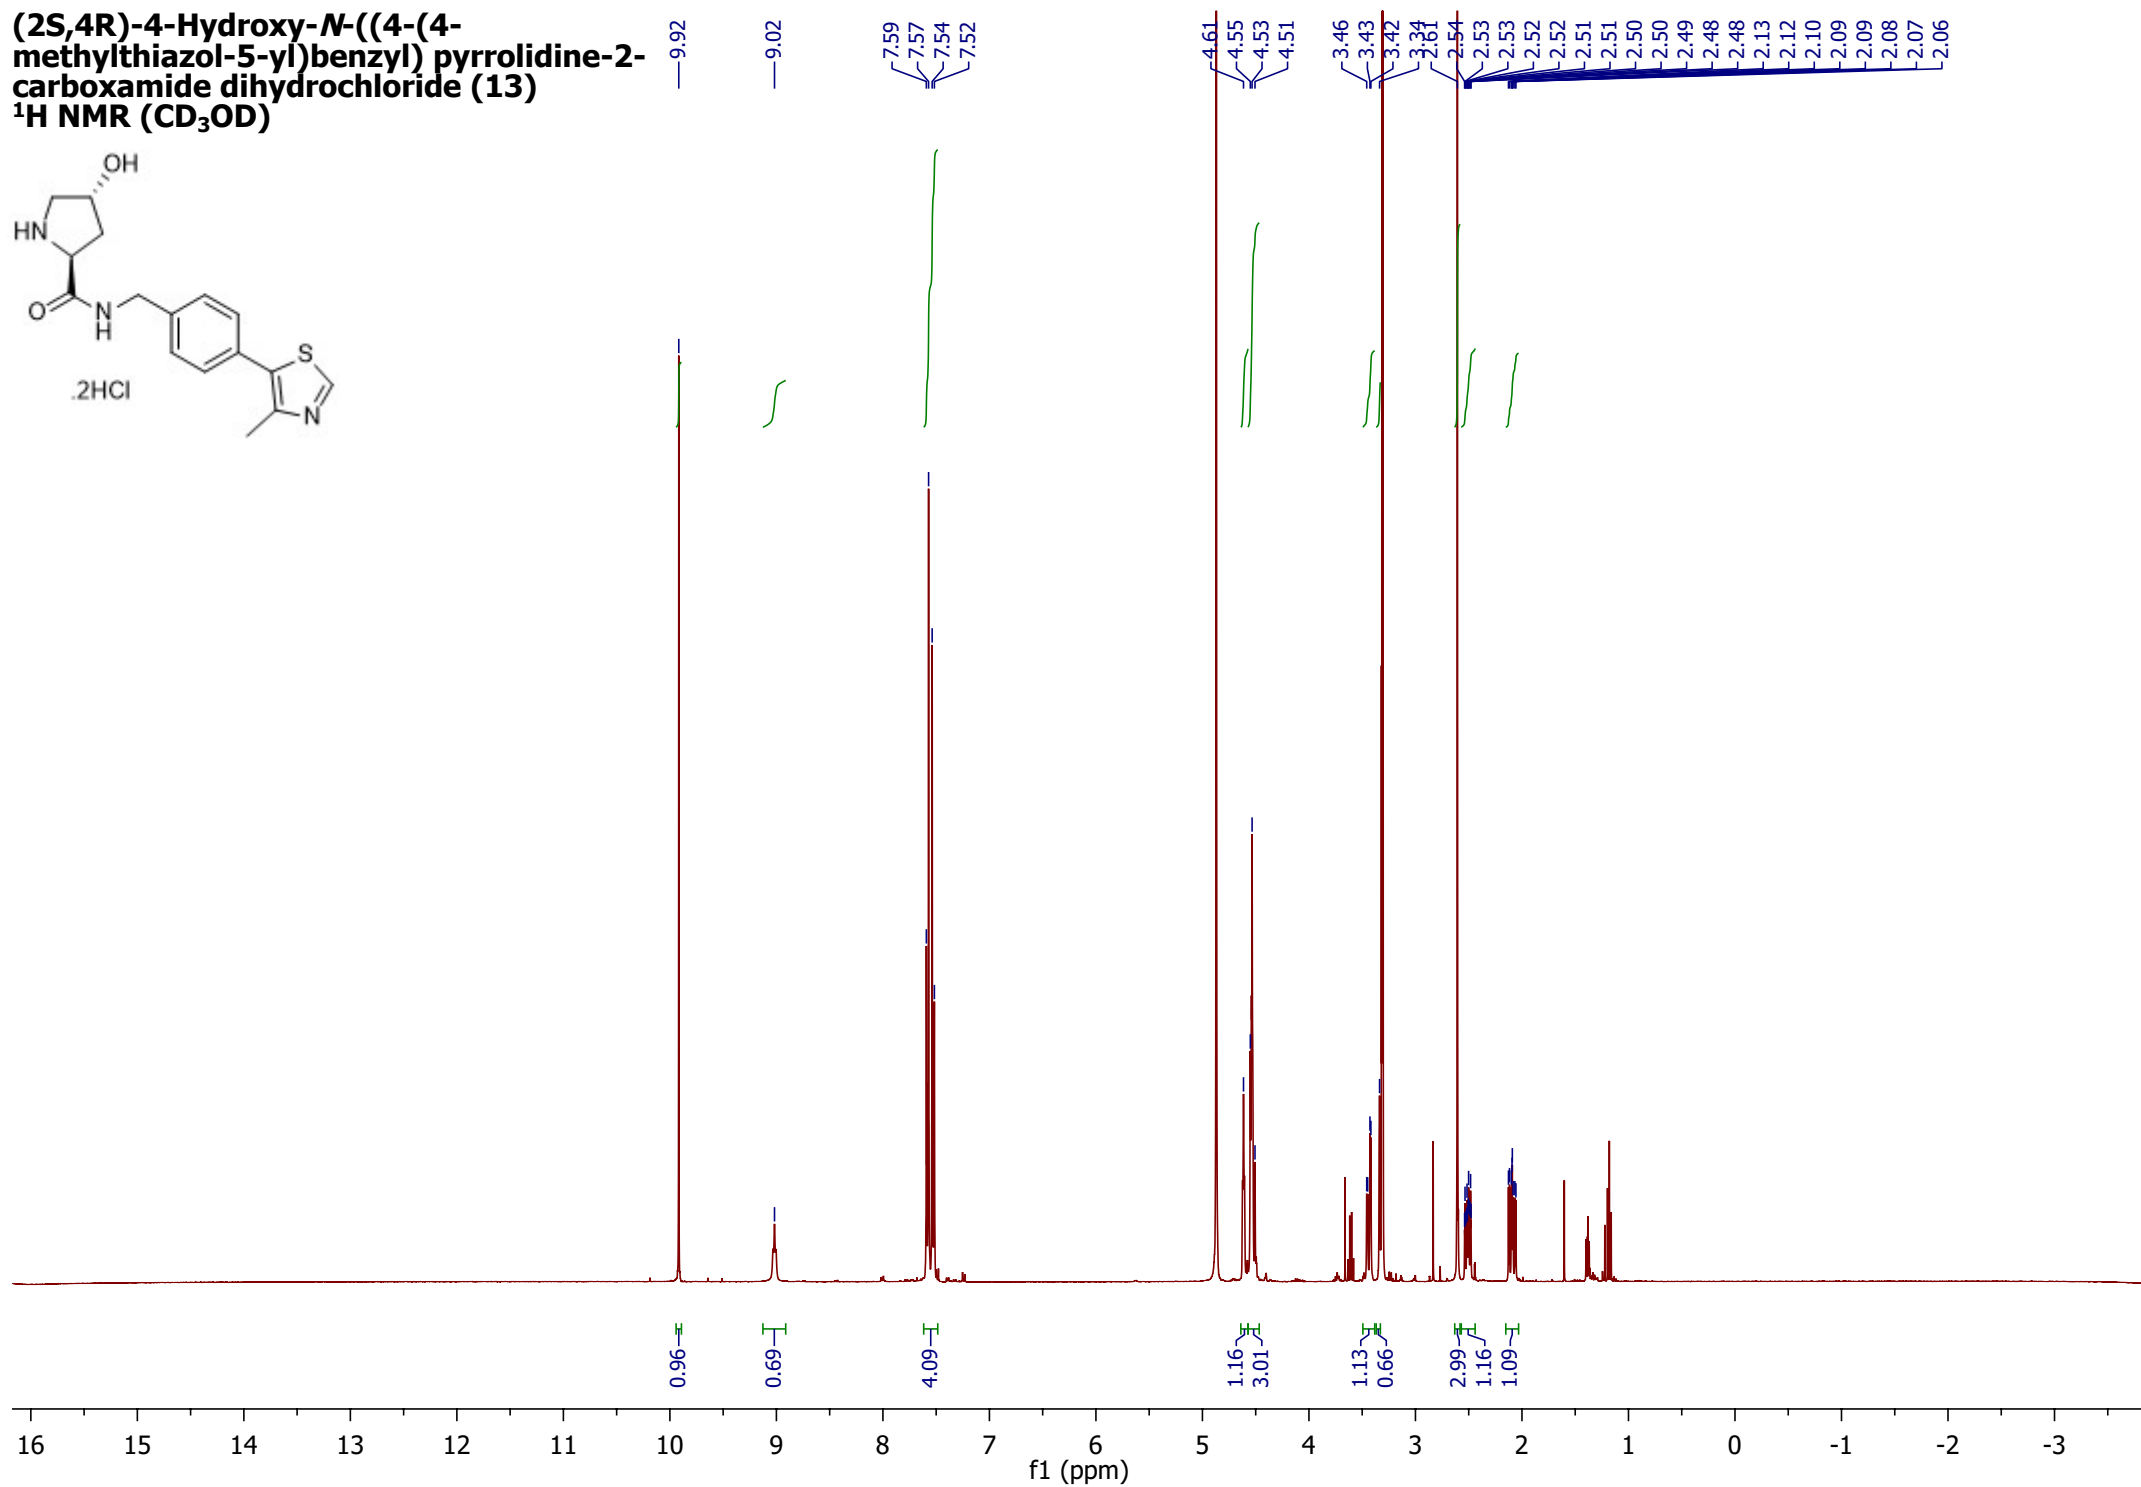

**2-(Aminomethyl)-5-(4-methylthiazol-5-yl)phenol dihydrochloride (17)**  
**<sup>1</sup>H NMR (DMSO-d6)**

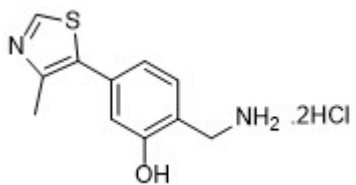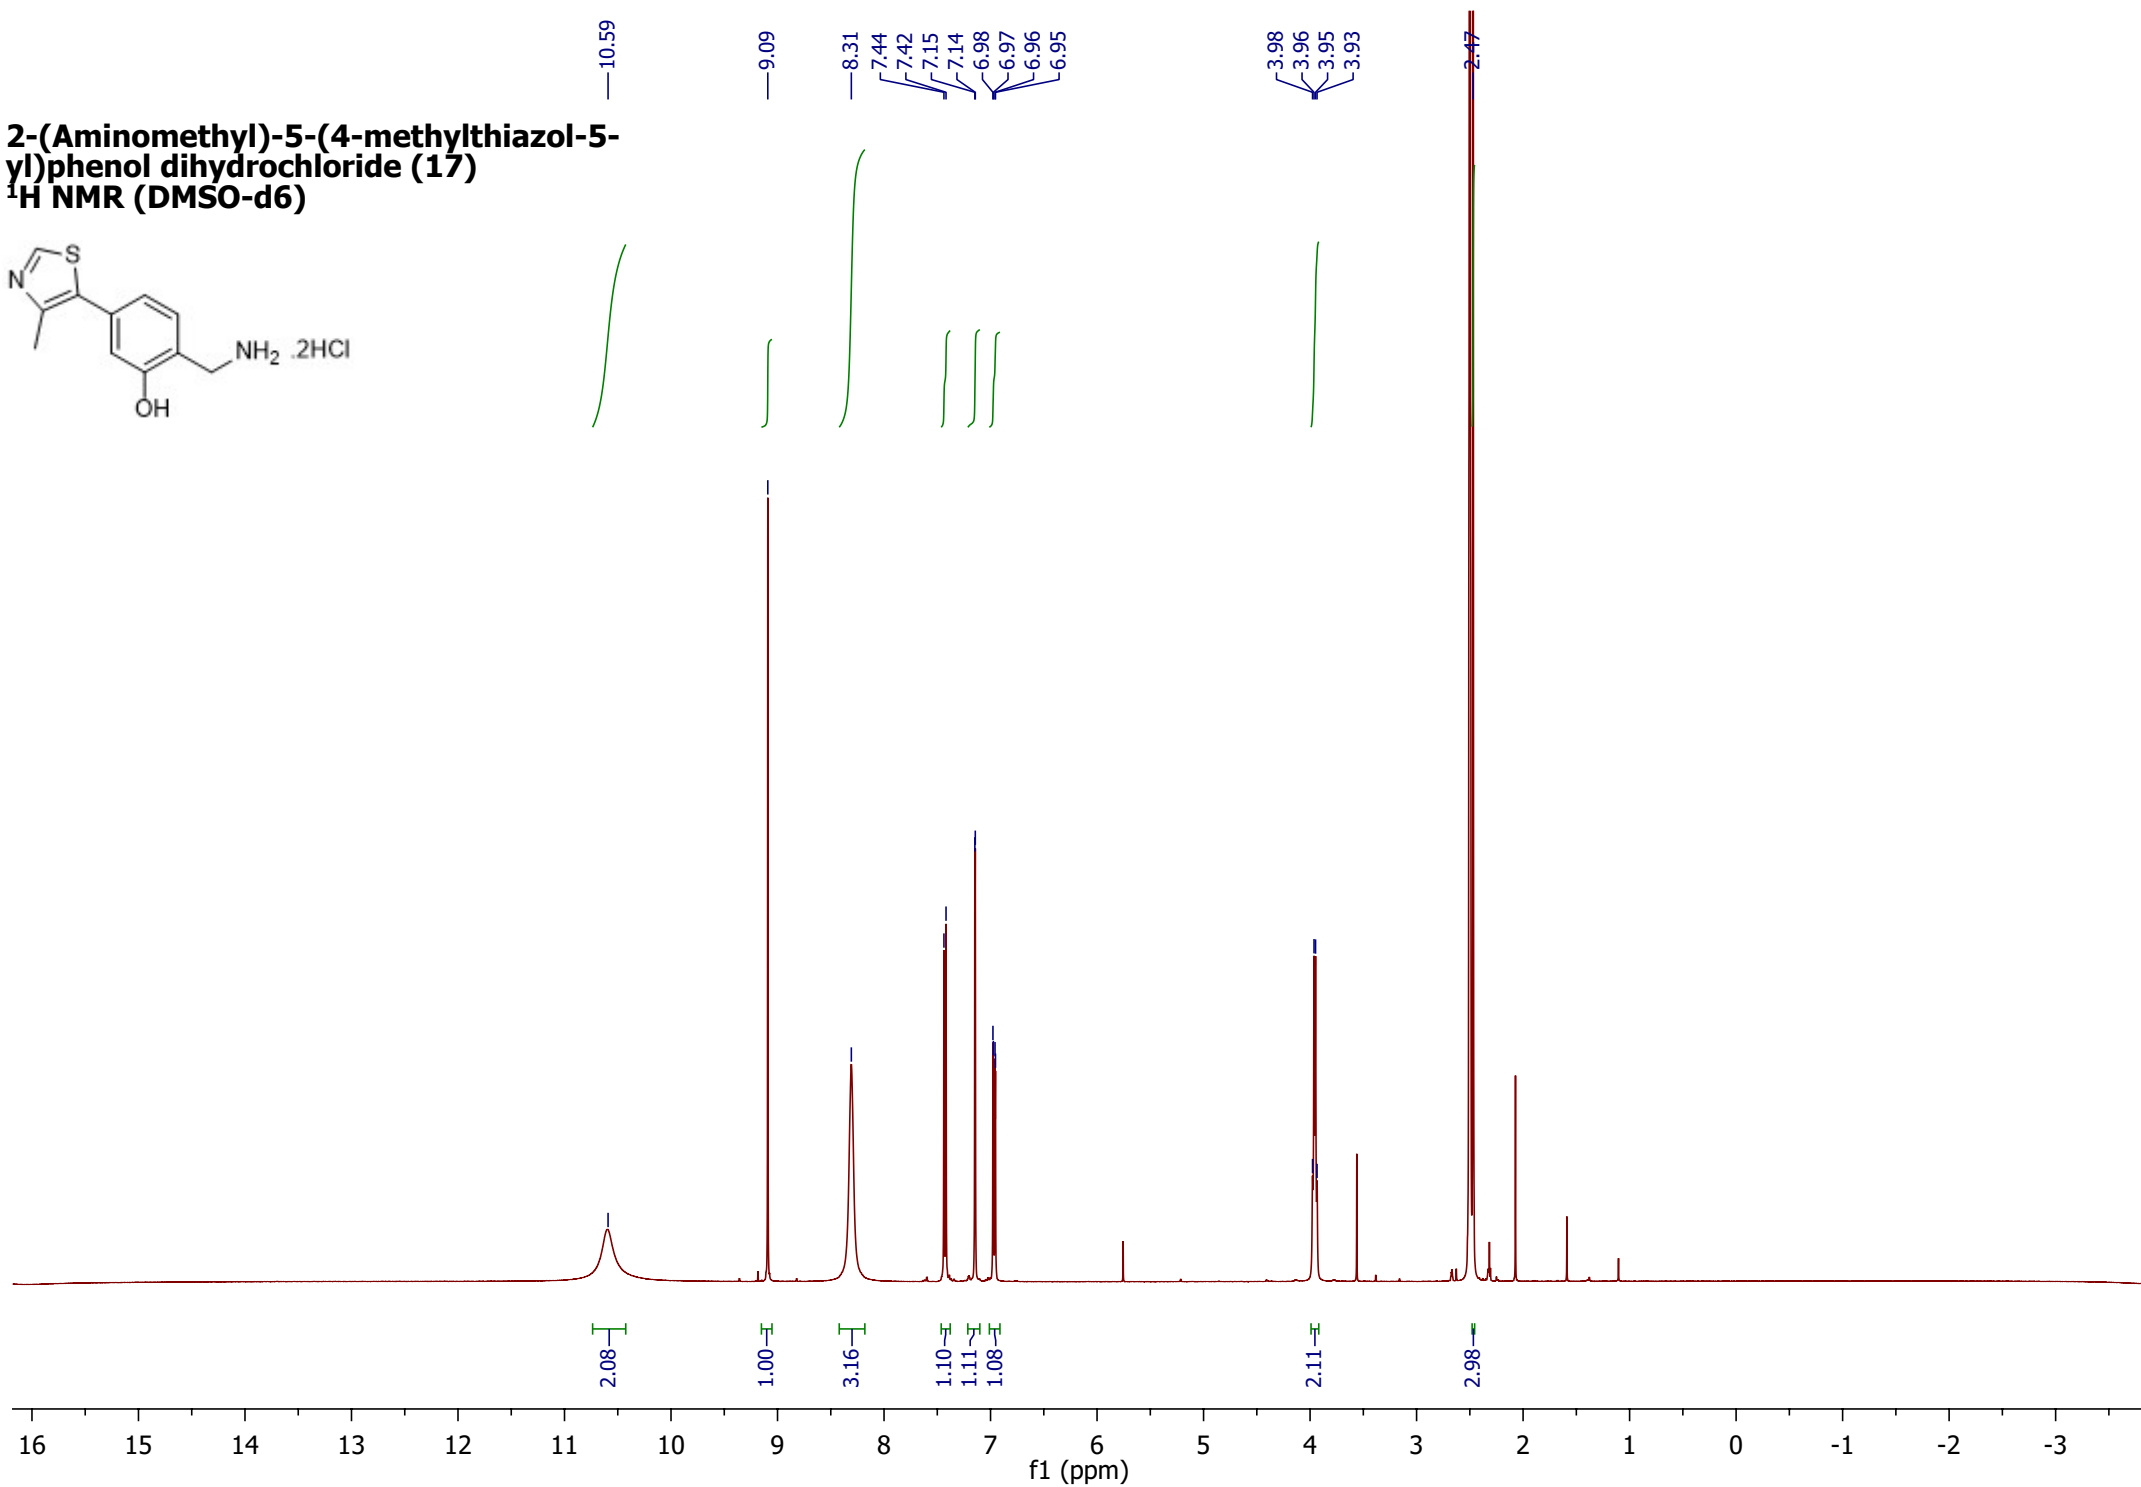



***tert*-Butyl (4-bromo-2-hydroxybenzyl)carbamate (19)**

<sup>1</sup>H NMR (CDCl<sub>3</sub>)

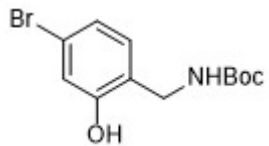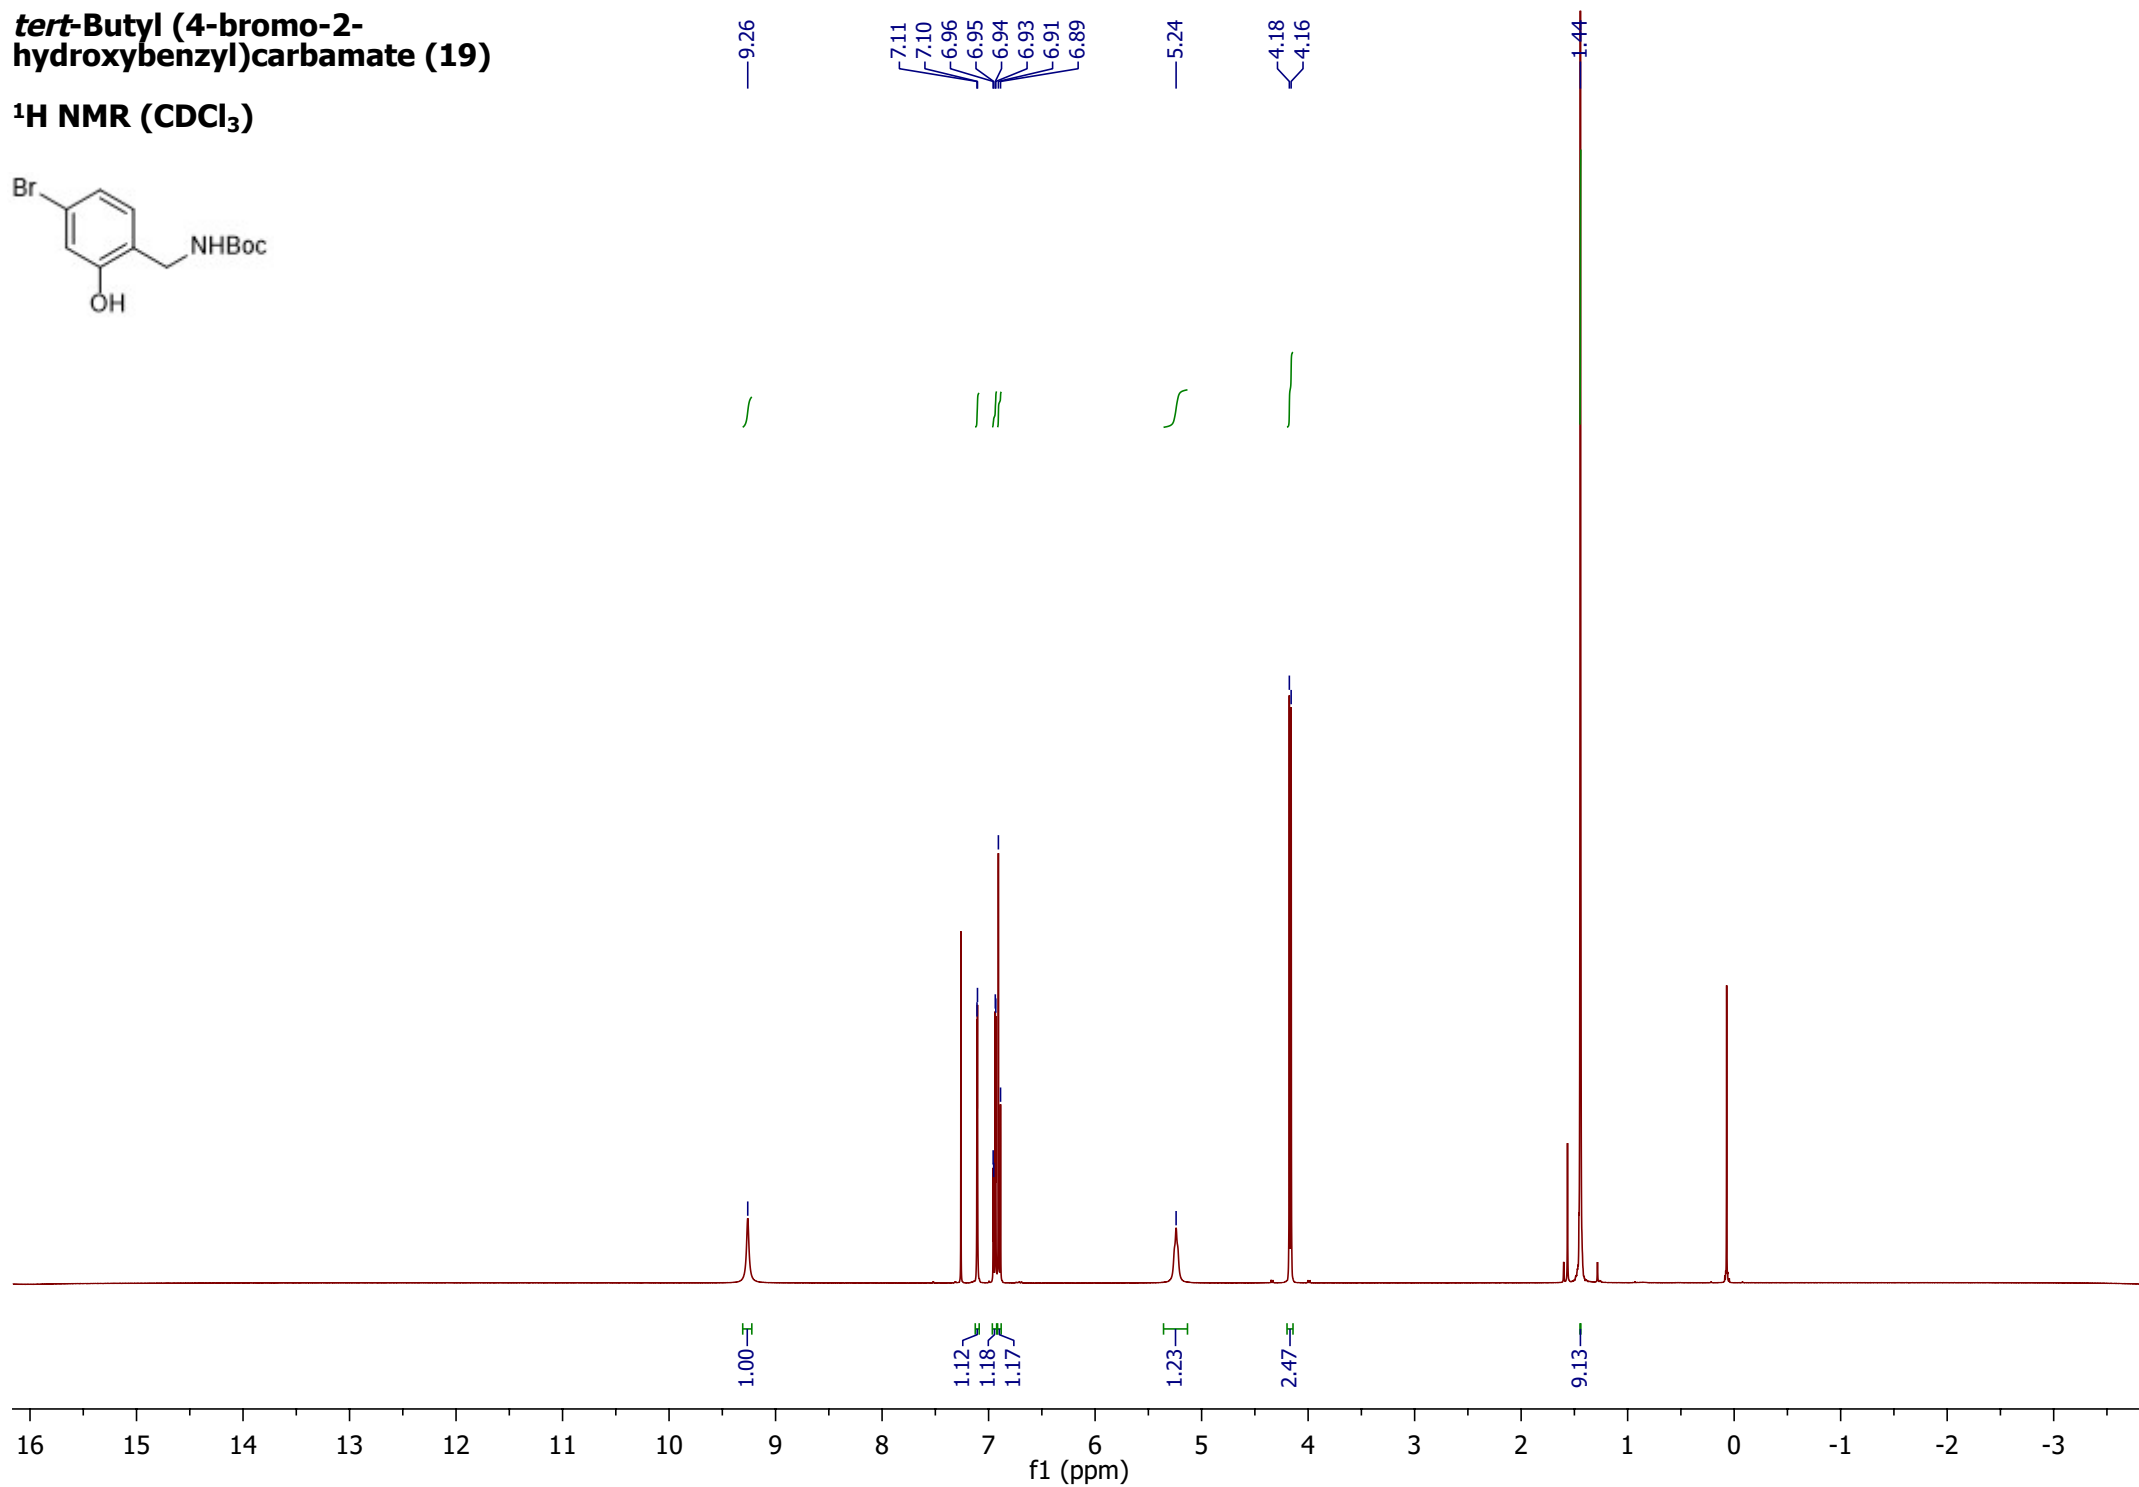

***tert*-Butyl (2-hydroxy-4-(4-methylthiazol-5-yl)benzyl)carbamate (20)**  
**<sup>1</sup>H NMR (CDCl<sub>3</sub>)**

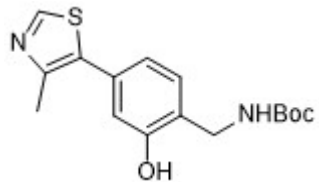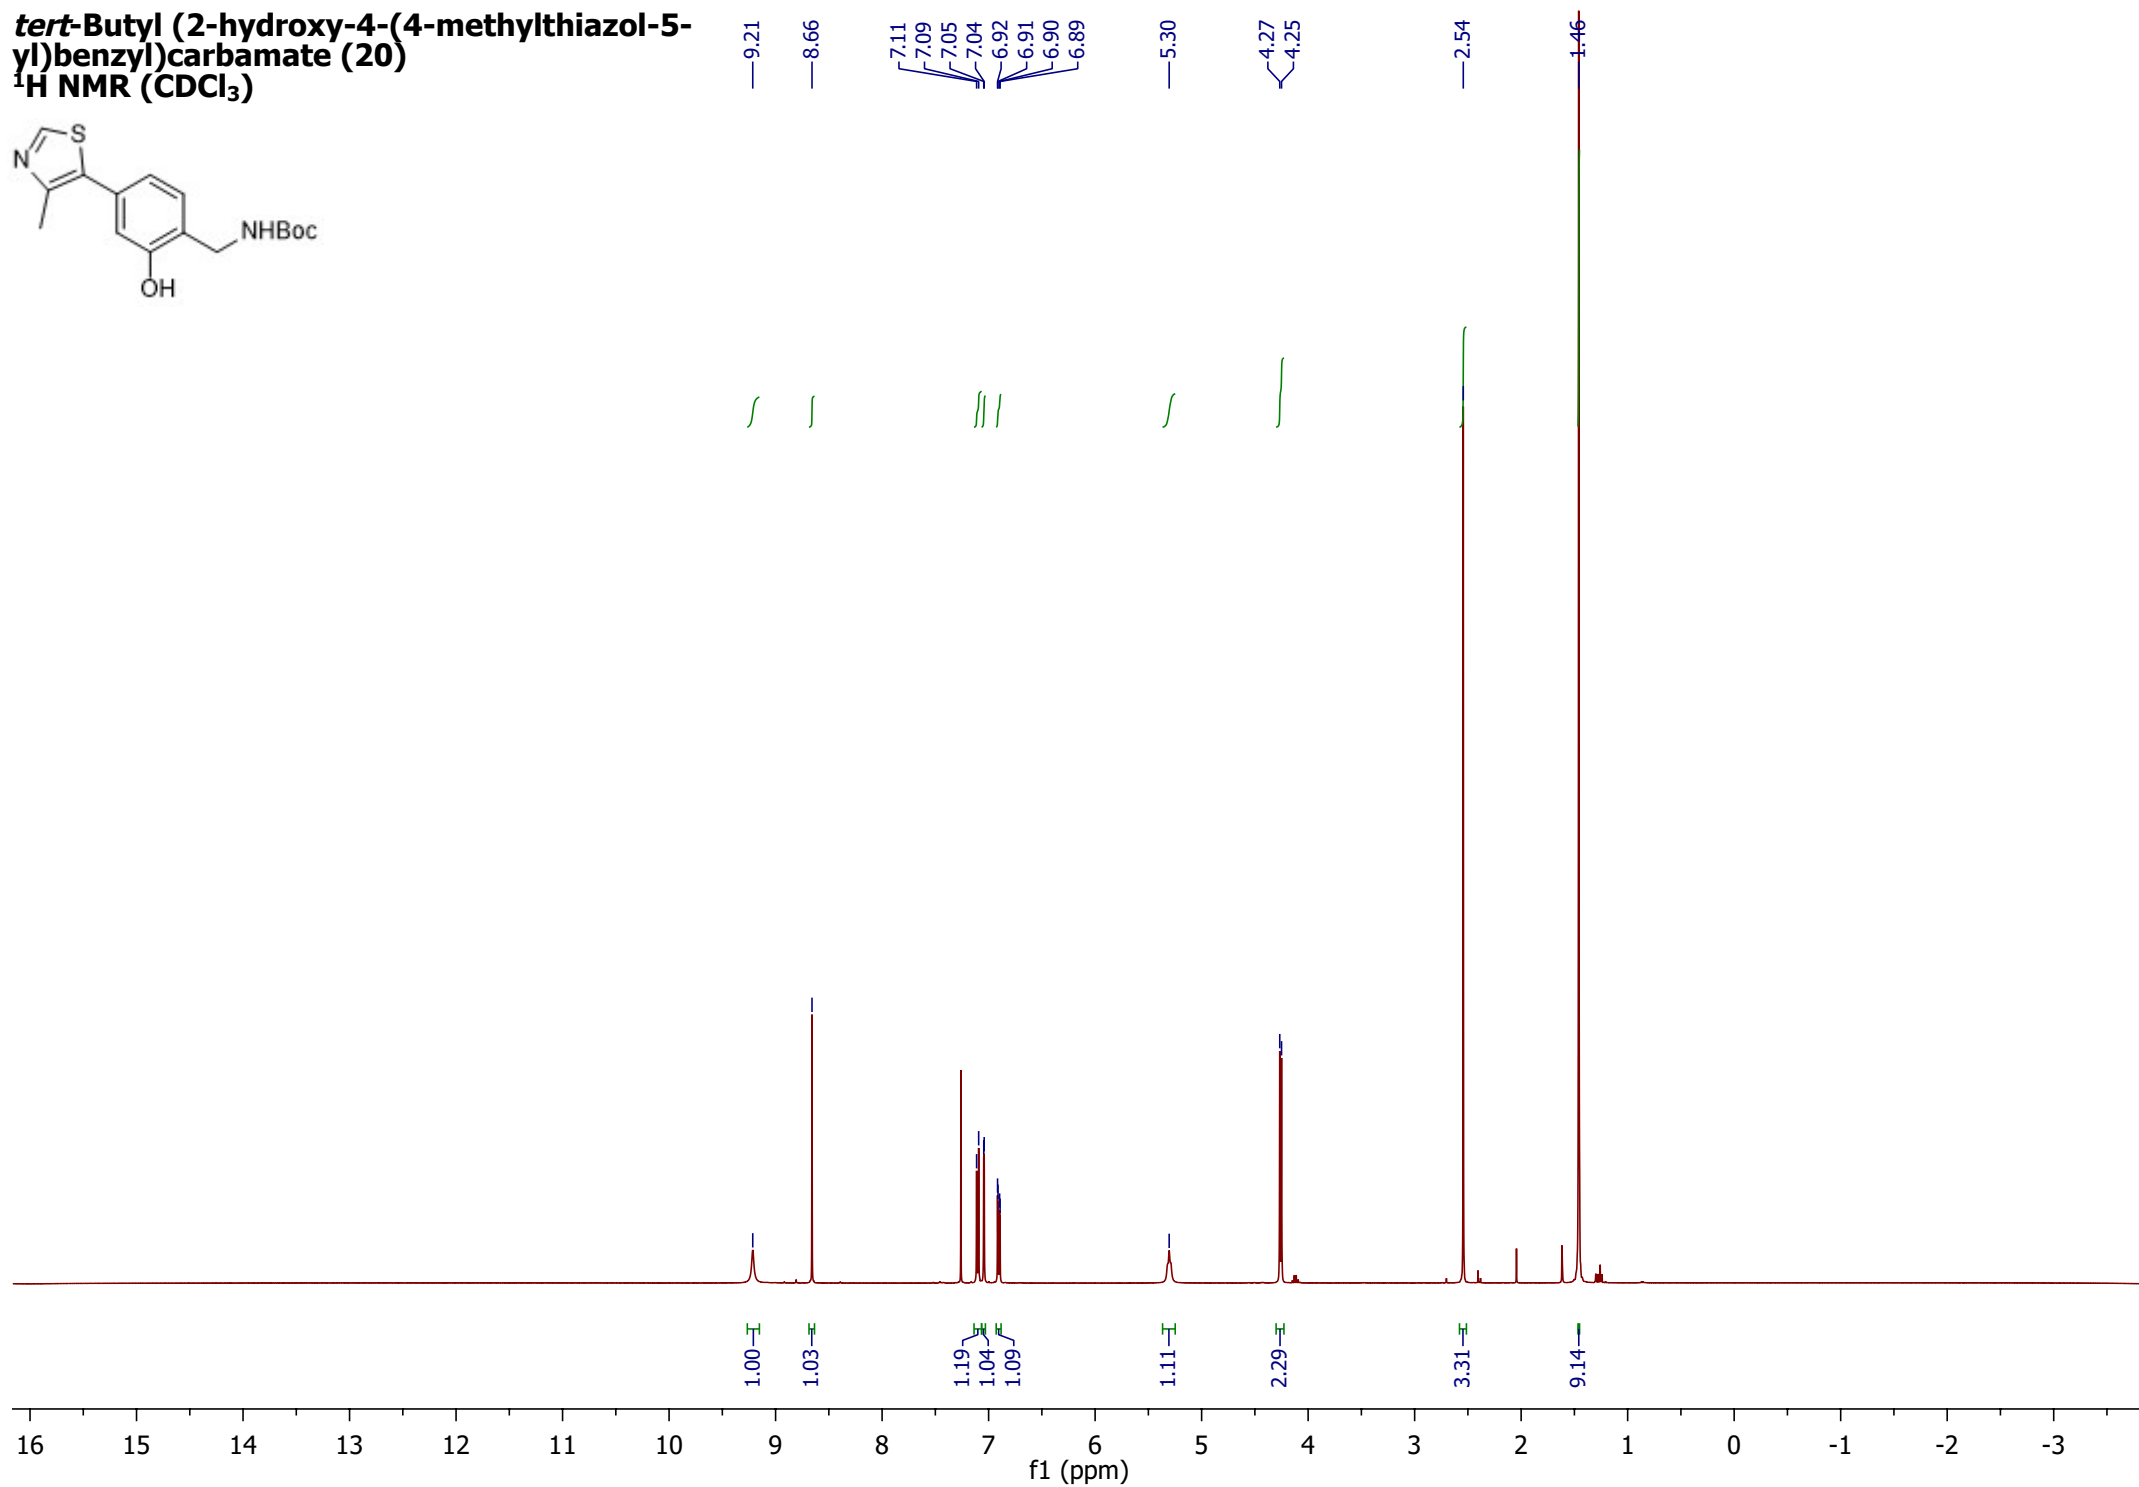

***tert*-Butyl (2*S*,4*S*)-4-(((9*H*-fluoren-9-yl)methoxy)carbonyl)amino)-2-(((*R*)-1,2,3,4-tetrahydronaphthalen-1-yl)carbamoyl)pyrrolidine-1-carboxylate (22)  
<sup>1</sup>H NMR (CDCl<sub>3</sub>)**

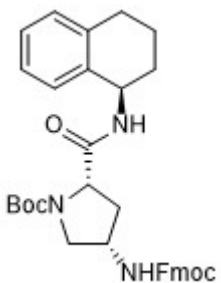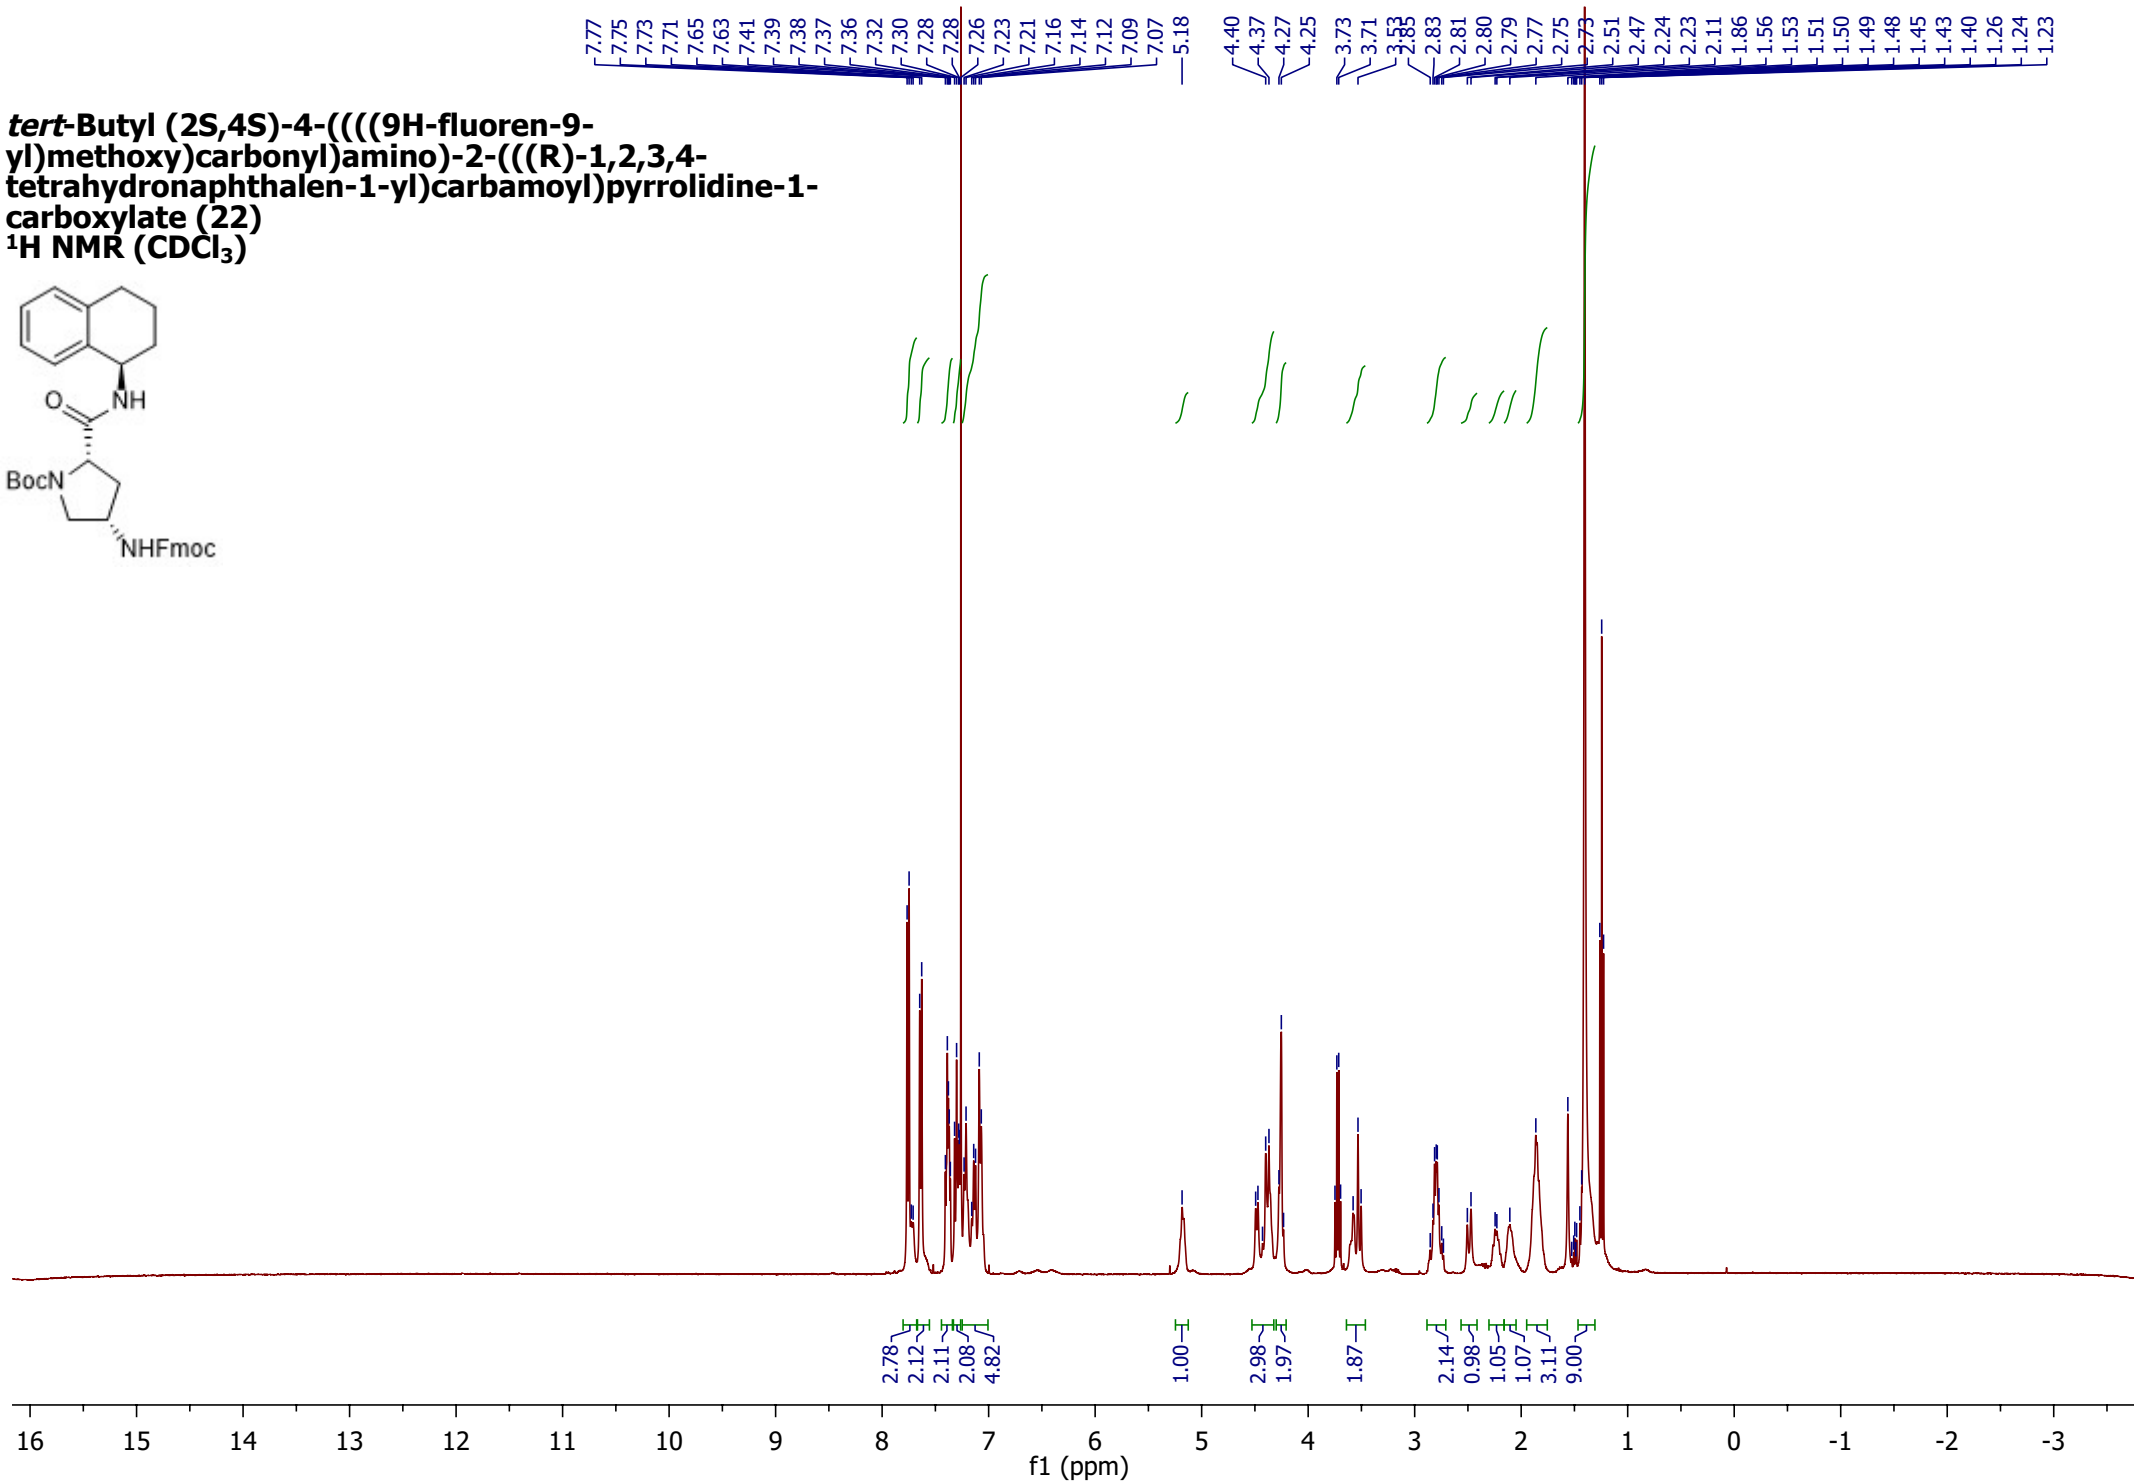

**(9H-Fluoren-9-yl)methyl ((3S,5S)-5-(((R)-1,2,3,4-tetrahydronaphthalen-1-yl)carbamoyl)pyrrolidin-3-yl)carbamate trifluoroacetate (23)**  
**<sup>1</sup>H NMR (DMSO-d6)**

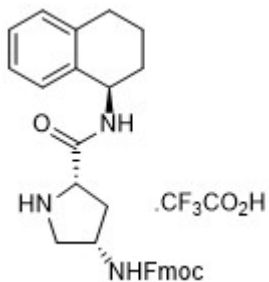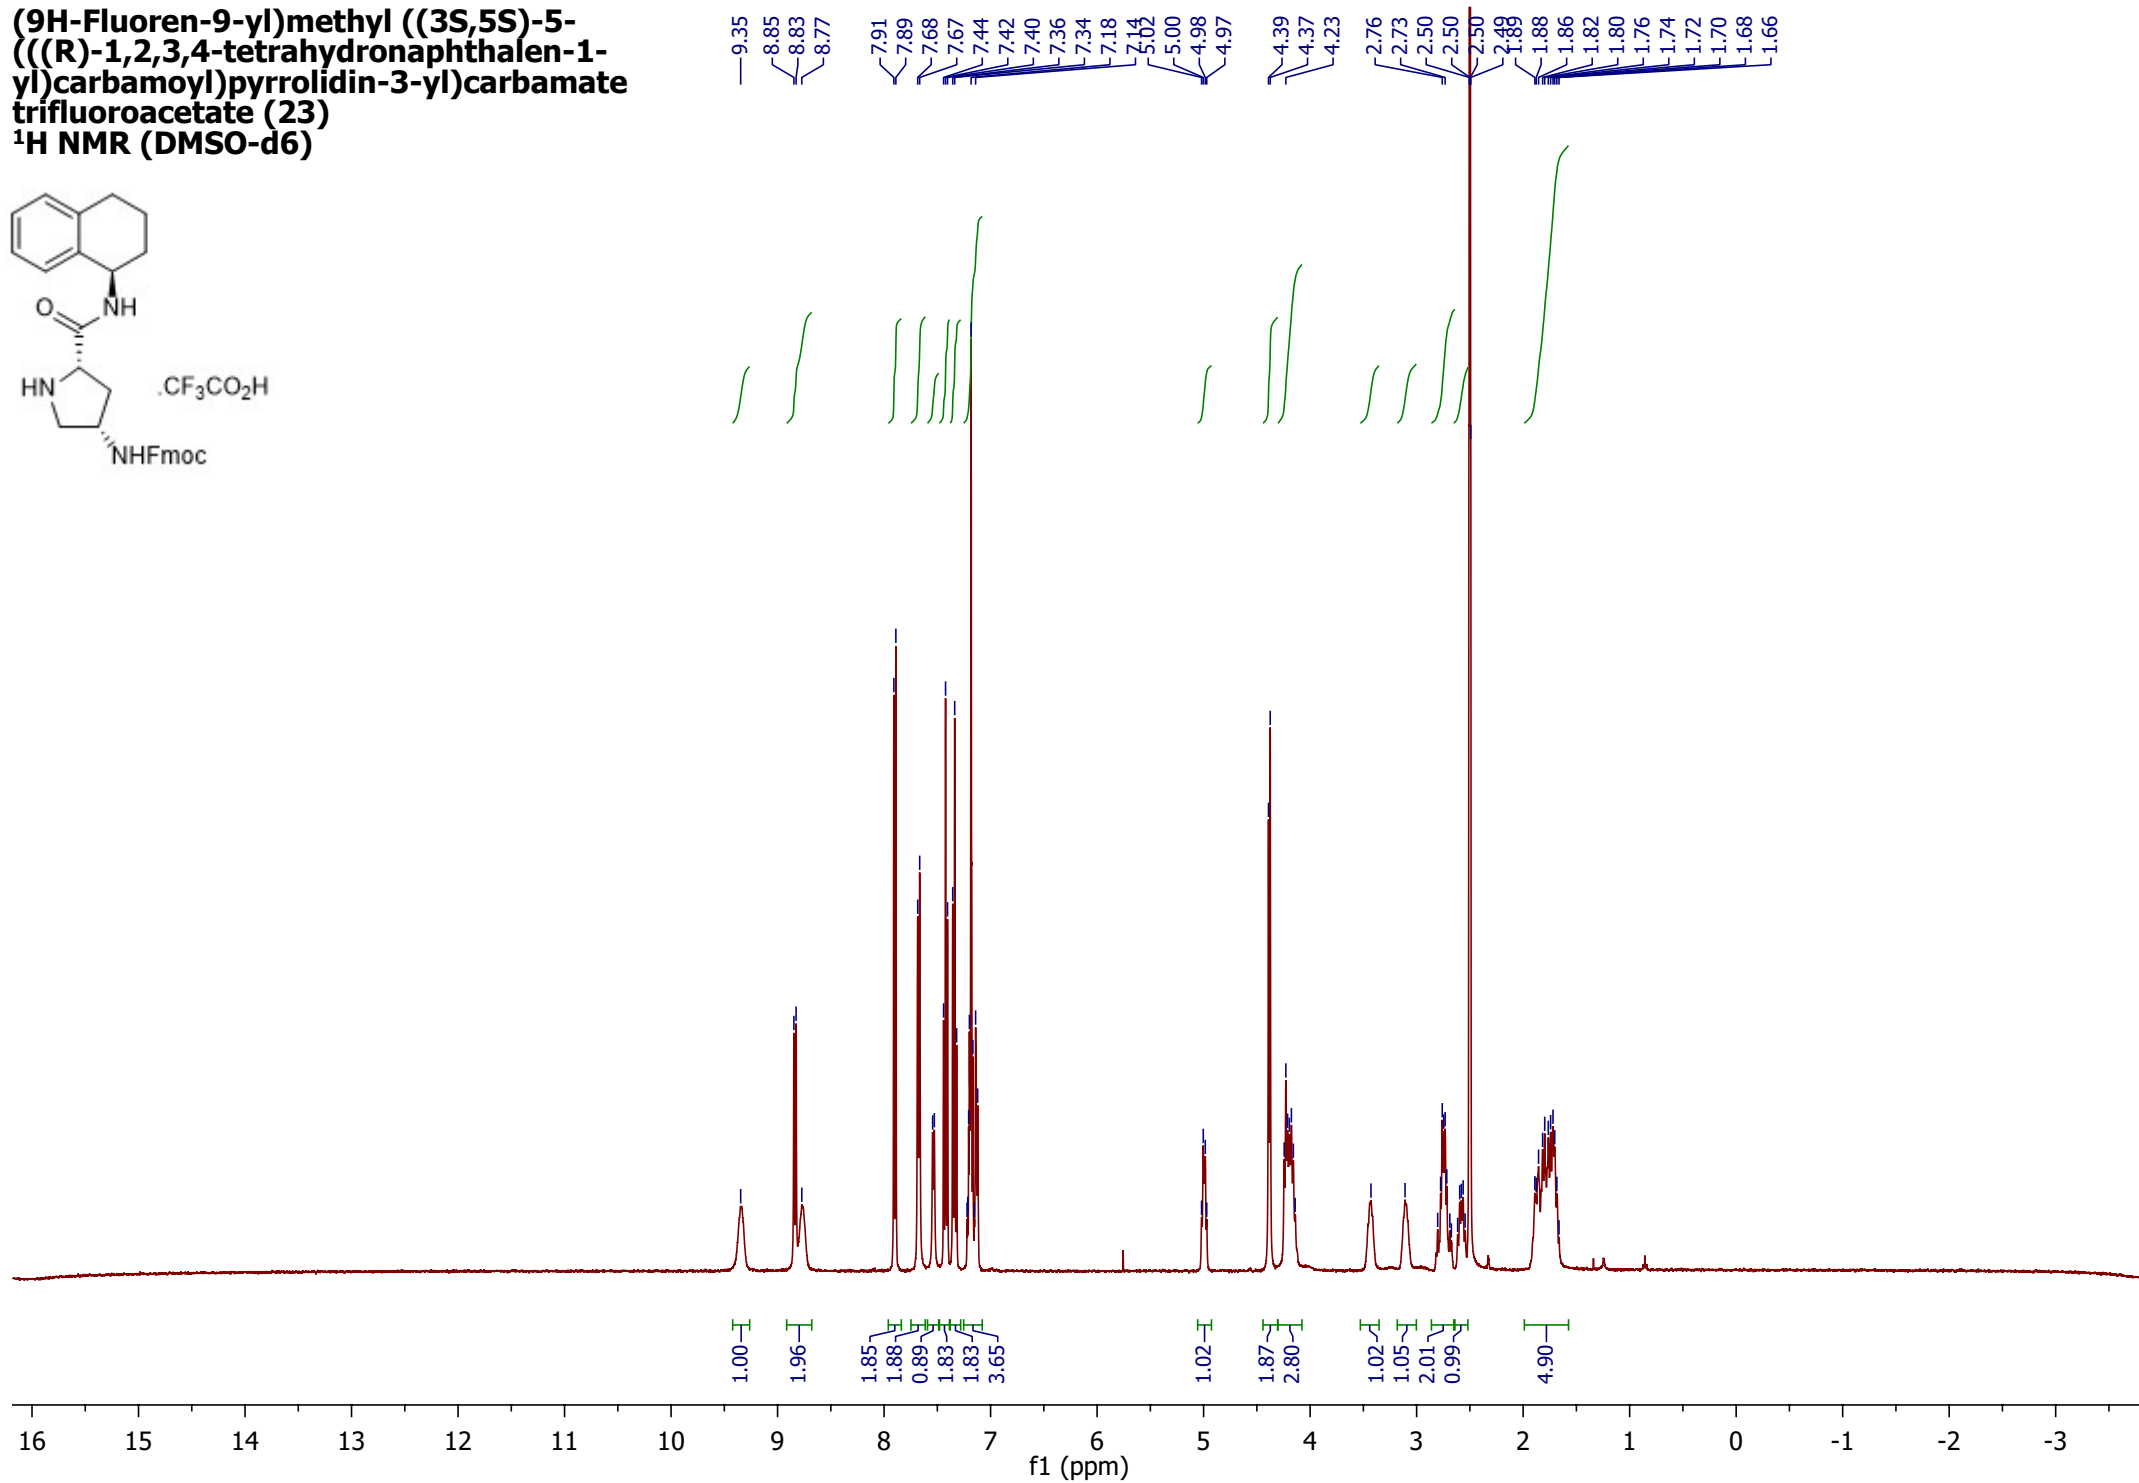

8.49  
8.47  
8.12  
7.91  
7.89  
7.69  
7.67  
7.44  
7.43  
7.41  
7.35  
7.33  
7.32  
7.30  
7.28  
7.17  
7.16  
7.14  
7.14  
7.12  
7.10  
7.09  
7.09  
4.95  
4.94  
4.38  
4.36  
4.34  
4.33  
4.32  
4.31  
4.24  
4.23  
4.21  
4.10  
4.09  
4.05  
4.04  
3.62  
3.61  
3.60  
3.59  
3.59  
3.58  
3.57  
3.43  
3.41  
3.40  
3.39  
3.37  
3.25  
3.13  
3.13  
3.12  
3.11  
3.10  
3.10  
2.74  
2.73  
2.69  
2.51  
2.50  
2.50  
2.50  
2.49  
2.43  
2.41  
2.40  
1.88  
1.86  
1.85  
1.74  
1.66  
1.64  
1.62  
1.30  
1.29  
1.27  
1.26  
1.17  
1.15  
1.13  
1.11  
1.09  
1.07

**(9H-Fluoren-9-yl)methyl ((3S,5S)-1-((S)-2-amino-2-cyclohexylacetyl)-5-(((R)-1,2,3,4-tetrahydronaphthalen-1-yl)carbamoyl)pyrrolidin-3-yl)carbamate hydrochloride (25)**  
**<sup>1</sup>H NMR (DMSO-d<sub>6</sub>)**

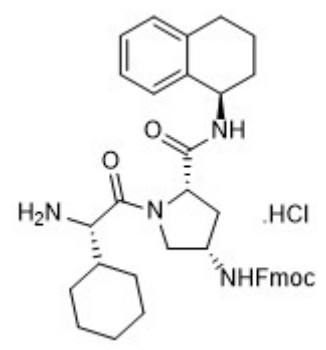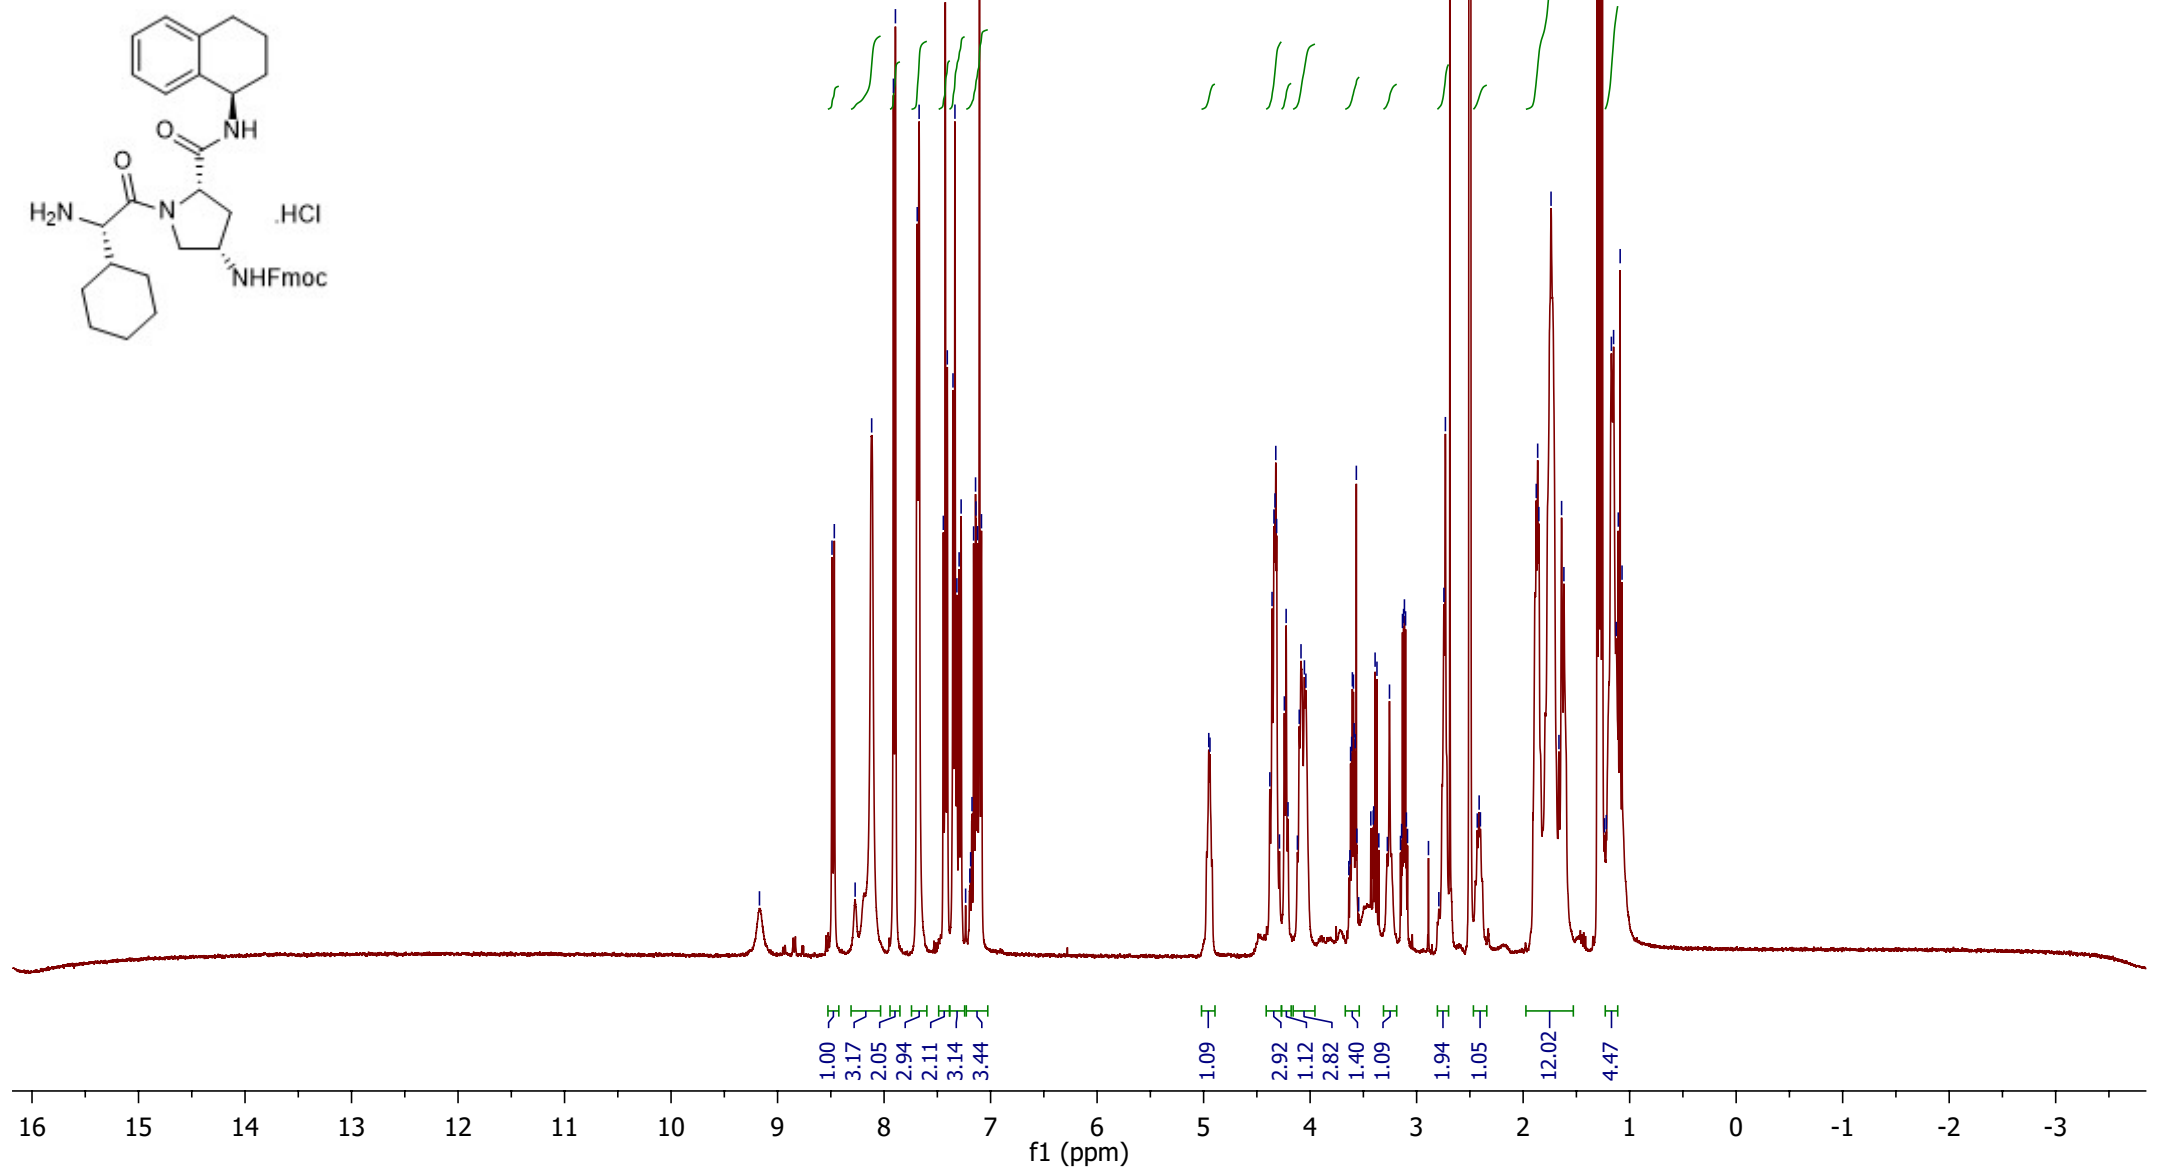

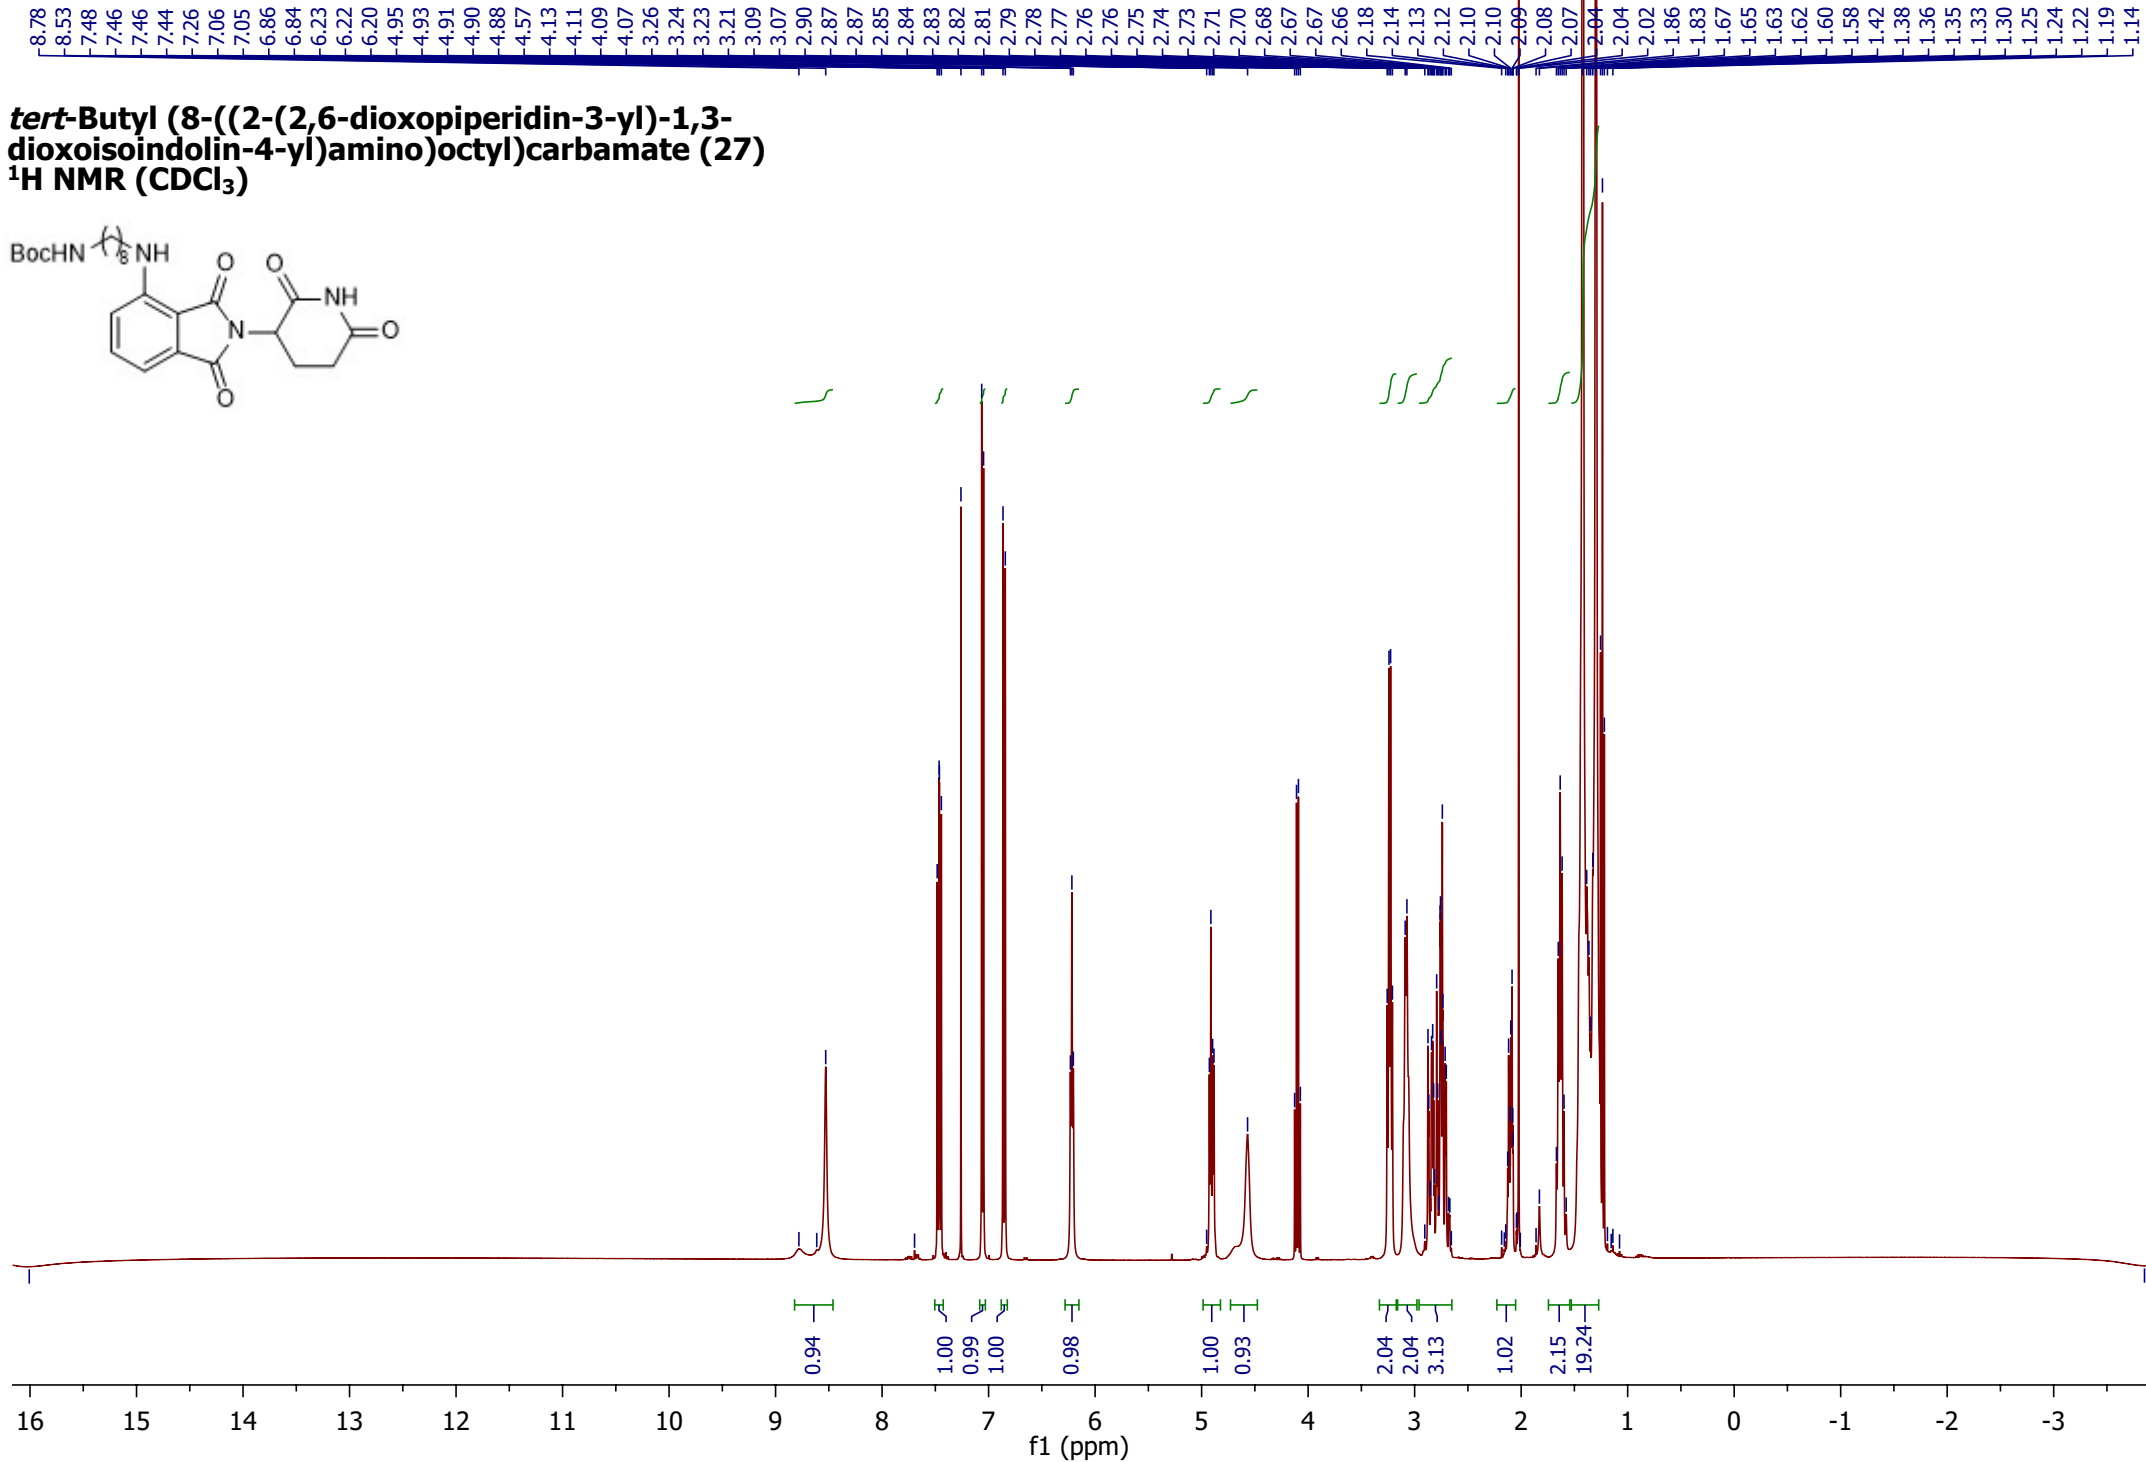

**4-((8-Aminoocetyl)amino)-2-(2,6-dioxopiperidin-3-yl)isoindoline-1,3-dione hydrochloride (28)**  
**<sup>1</sup>H NMR (DMSO-d6)**

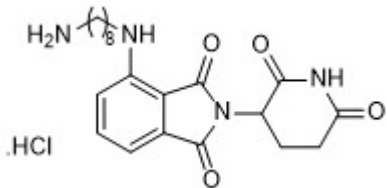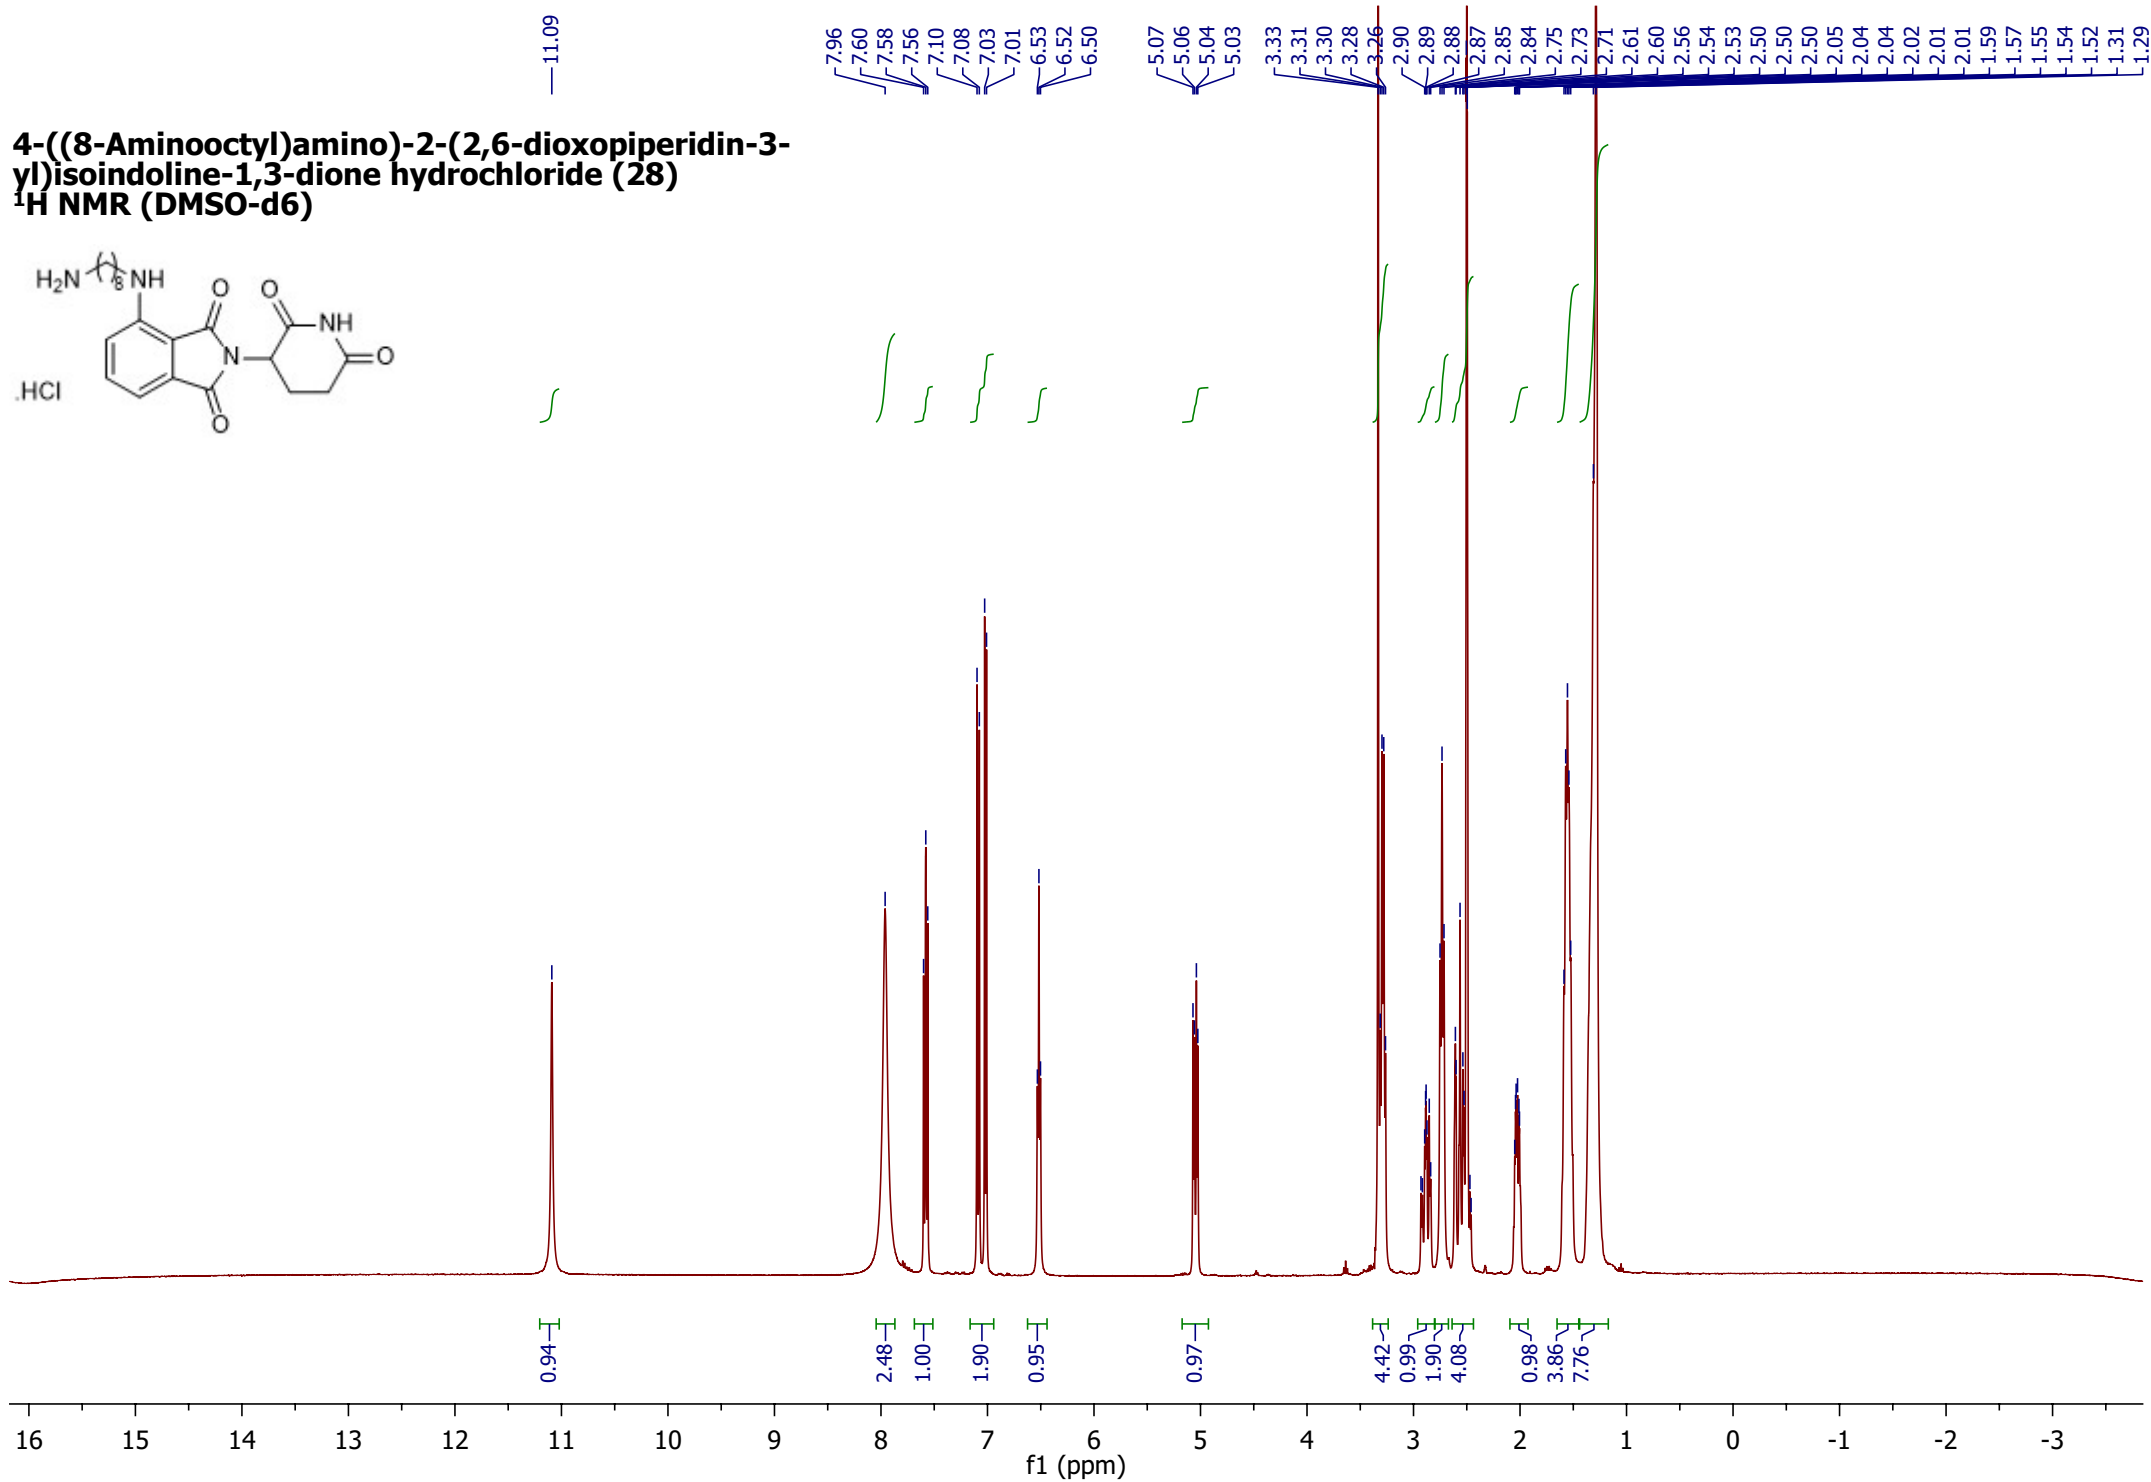

**4-((8-Aminoethyl)amino)-2-(2,6-dioxopiperidin-3-yl)isoindoline-1,3-dione hydrochloride (28)**

<sup>13</sup>C NMR (DMSO-d<sub>6</sub>)

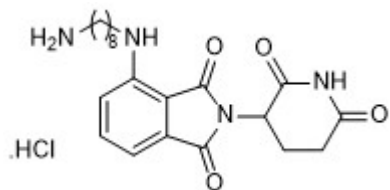

172.55  
169.83  
168.69  
167.03

146.16

136.03

131.92

116.92

110.13

108.73

48.27

39.67

39.46

39.25

38.94

28.37

28.28

28.18

26.63

25.94

25.51

21.88

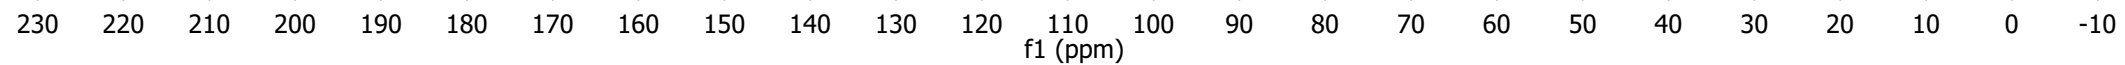



***tert*-Butyl 4-(2-(2,6-dioxopiperidin-3-yl)-1,3-dioxoisoindolin-5-yl)piperazine-1-carboxylate (29)**  
**<sup>1</sup>H NMR (CDCl<sub>3</sub>)**

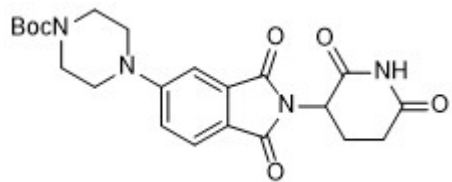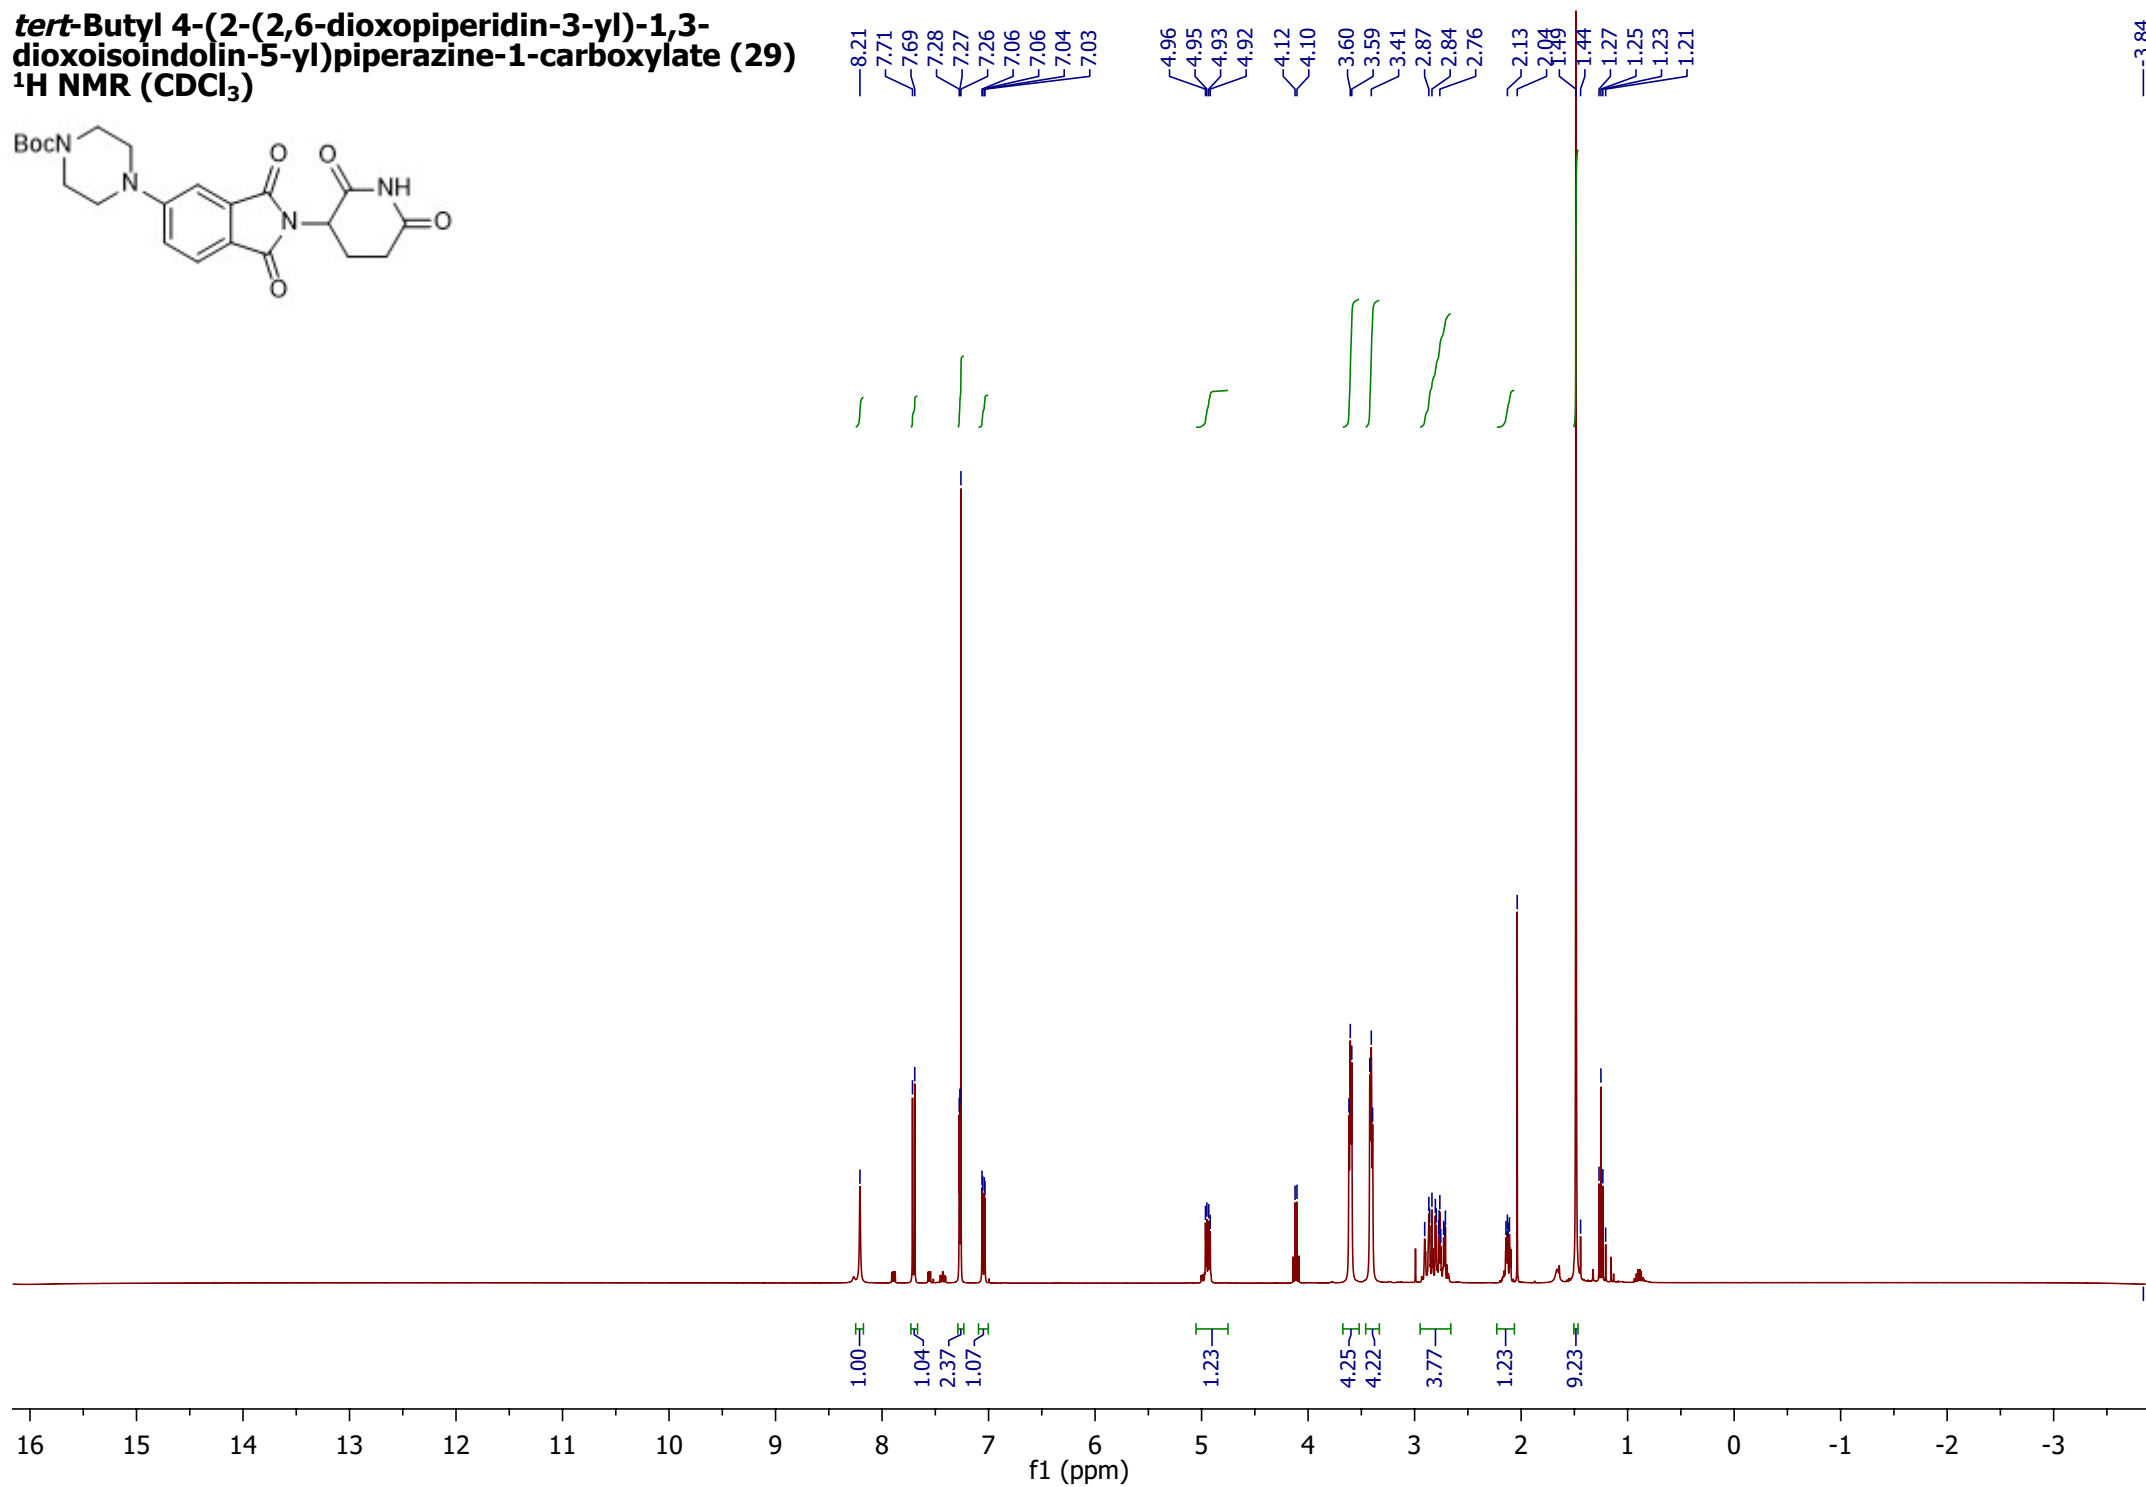

**2-(2,6-Dioxopiperidin-3-yl)-5-(piperazin-1-yl)isoindoline-1,3-dione hydrochloride (30)**  
**<sup>1</sup>H NMR (DMSO-d6)**

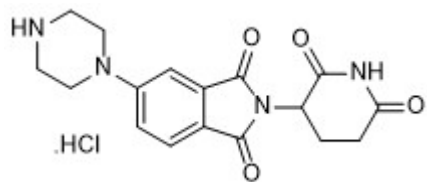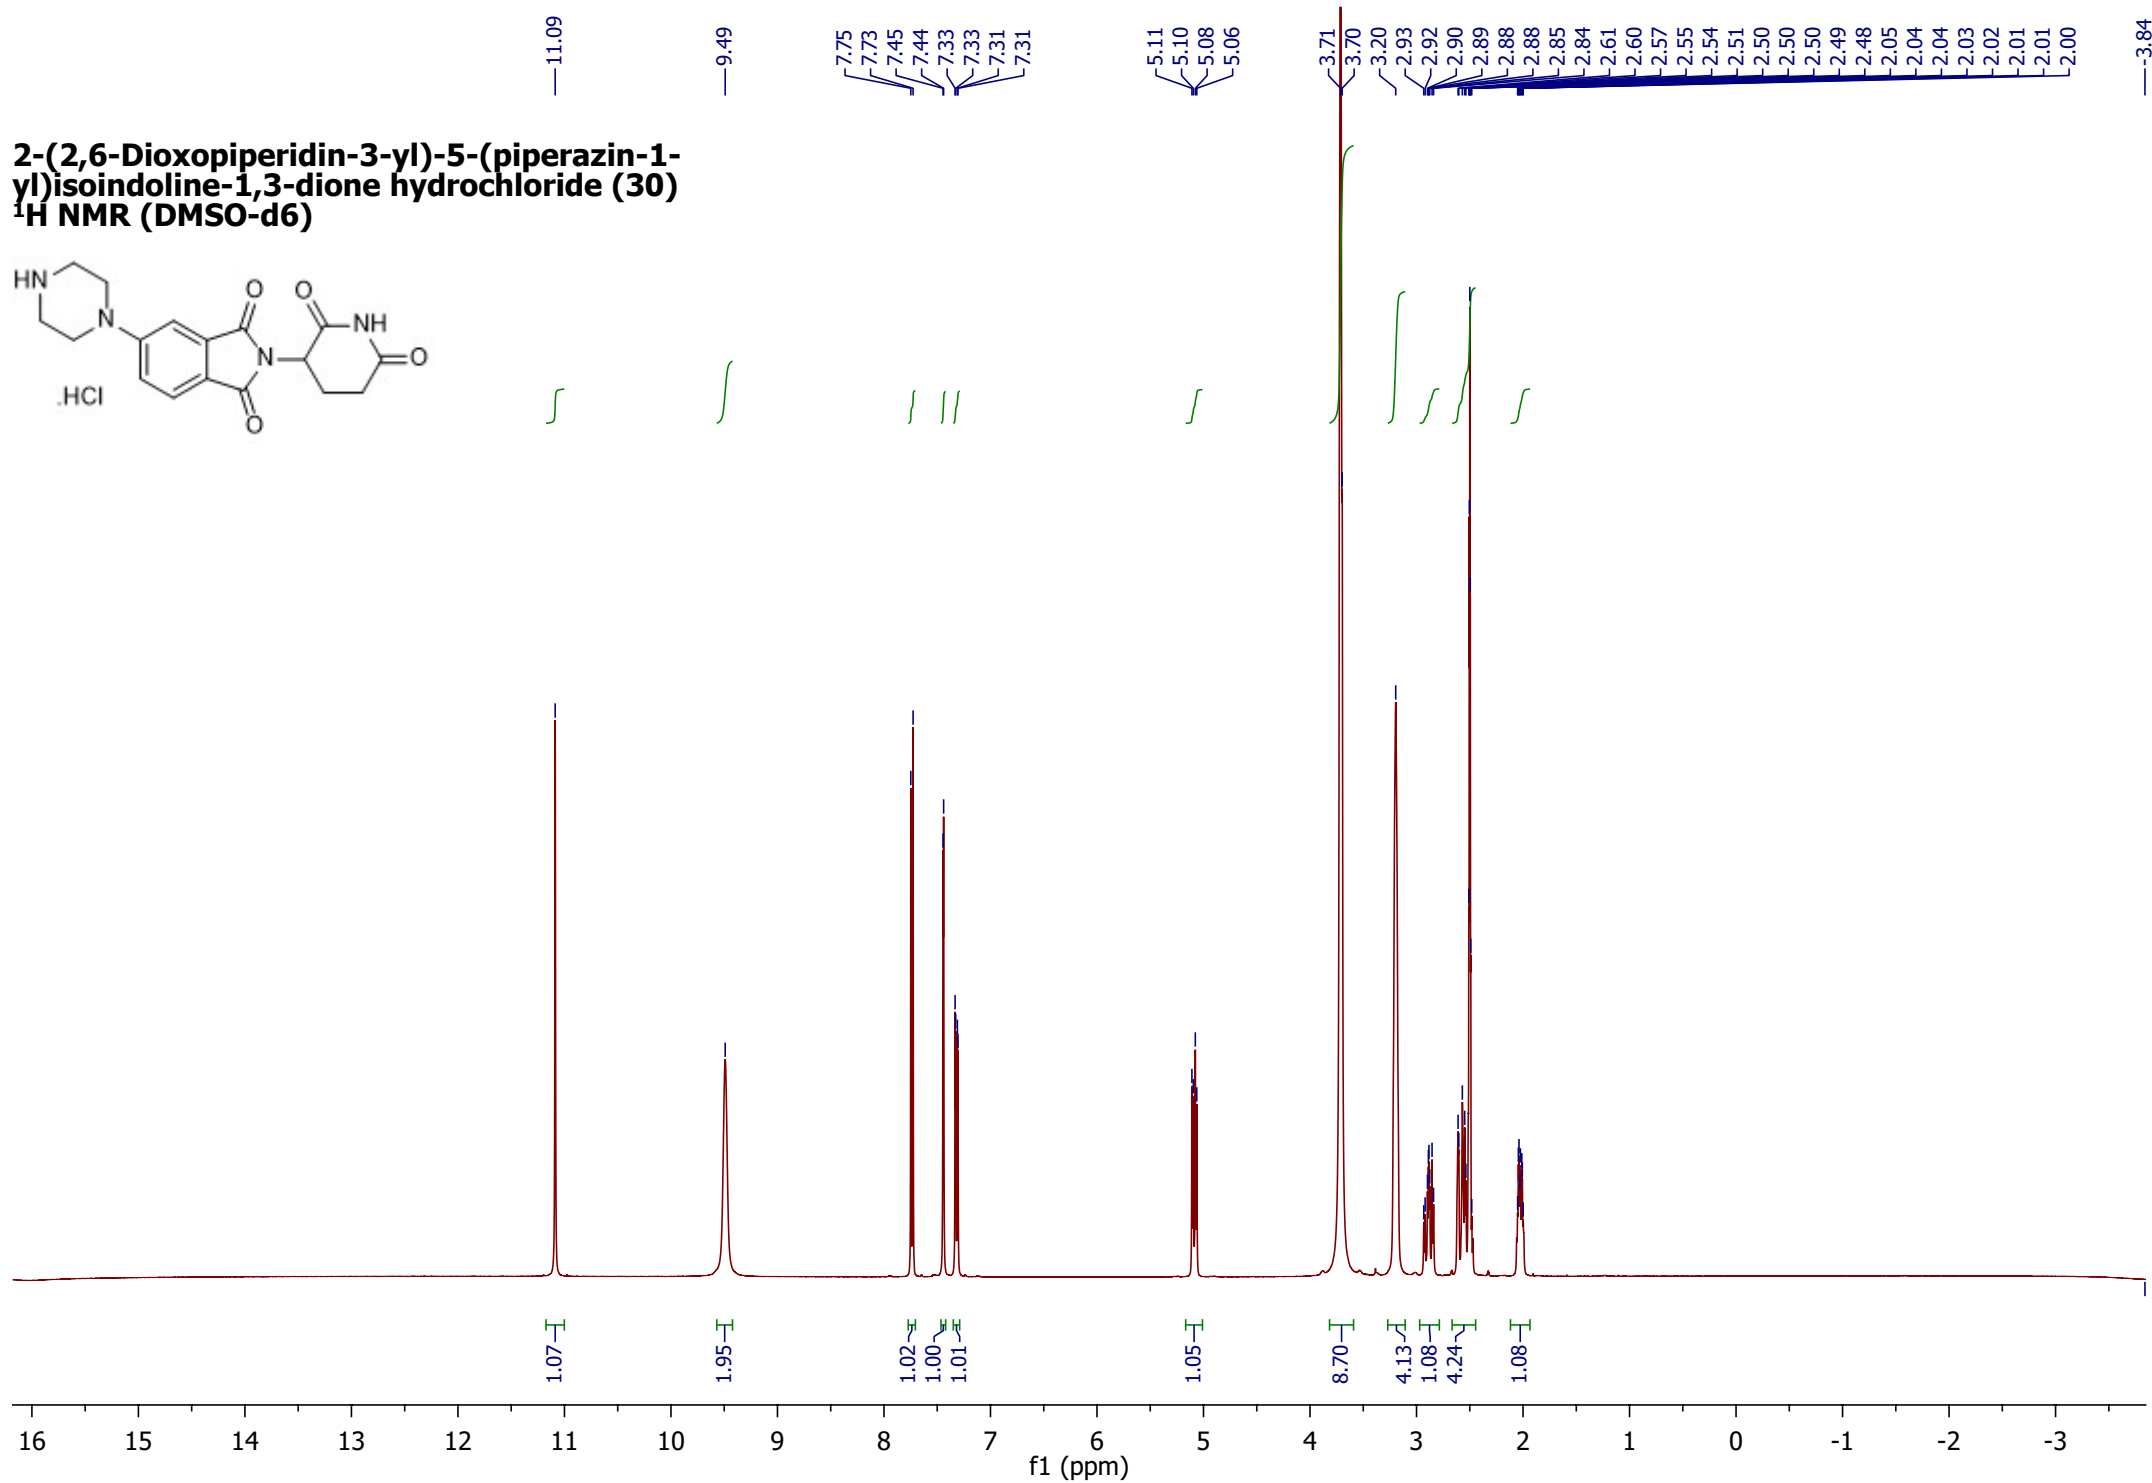

**2-(2,6-Dioxopiperidin-3-yl)-5-(piperazin-1-yl)isoindoline-1,3-dione hydrochloride (30)**

**<sup>13</sup>C NMR (DMSO-d6)**

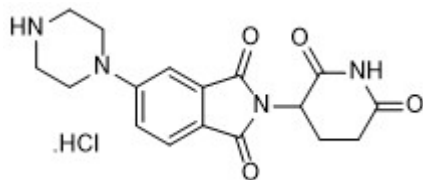

172.80  
170.03  
167.41  
166.90  
154.43

133.80

124.99  
119.64  
118.57

108.86

48.84  
44.12  
42.10  
40.15  
39.94  
39.73  
39.52  
39.31  
39.10  
38.89  
30.98

22.14

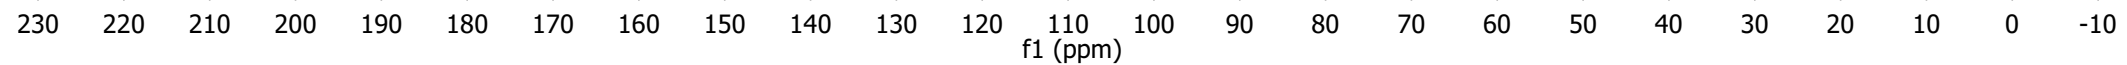

8.38  
7.68  
7.66  
7.66  
7.64  
7.47  
7.47  
7.45  
7.45  
7.28  
7.26  
5.10  
4.96  
4.96  
4.94  
4.93  
4.93  
4.92  
4.35  
4.34  
4.33  
4.14  
4.12  
4.10  
4.08  
3.94  
3.93  
3.92  
3.78  
3.77  
3.76  
3.76  
3.67  
3.66  
3.66  
3.65  
3.65  
3.64  
3.64  
3.62  
3.62  
3.61  
3.61  
3.60  
3.59  
3.59  
3.58  
3.53  
3.52  
3.51  
3.51  
3.30  
3.29  
2.90  
2.89  
2.86  
2.86  
2.85  
2.82  
2.81  
2.79  
2.78  
2.76  
2.76  
2.75  
2.72  
2.72  
2.71  
2.71  
2.16  
2.13  
2.13  
2.12  
2.11  
2.11  
2.10  
2.08  
2.03  
1.89  
1.43  
1.26  
1.25  
1.23

**Thalidomide 4'ether-PEG5-amine, N-Boc protected (31)**  
**<sup>1</sup>H NMR (CDCl<sub>3</sub>)**

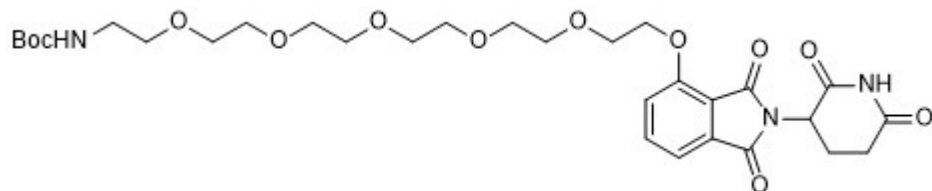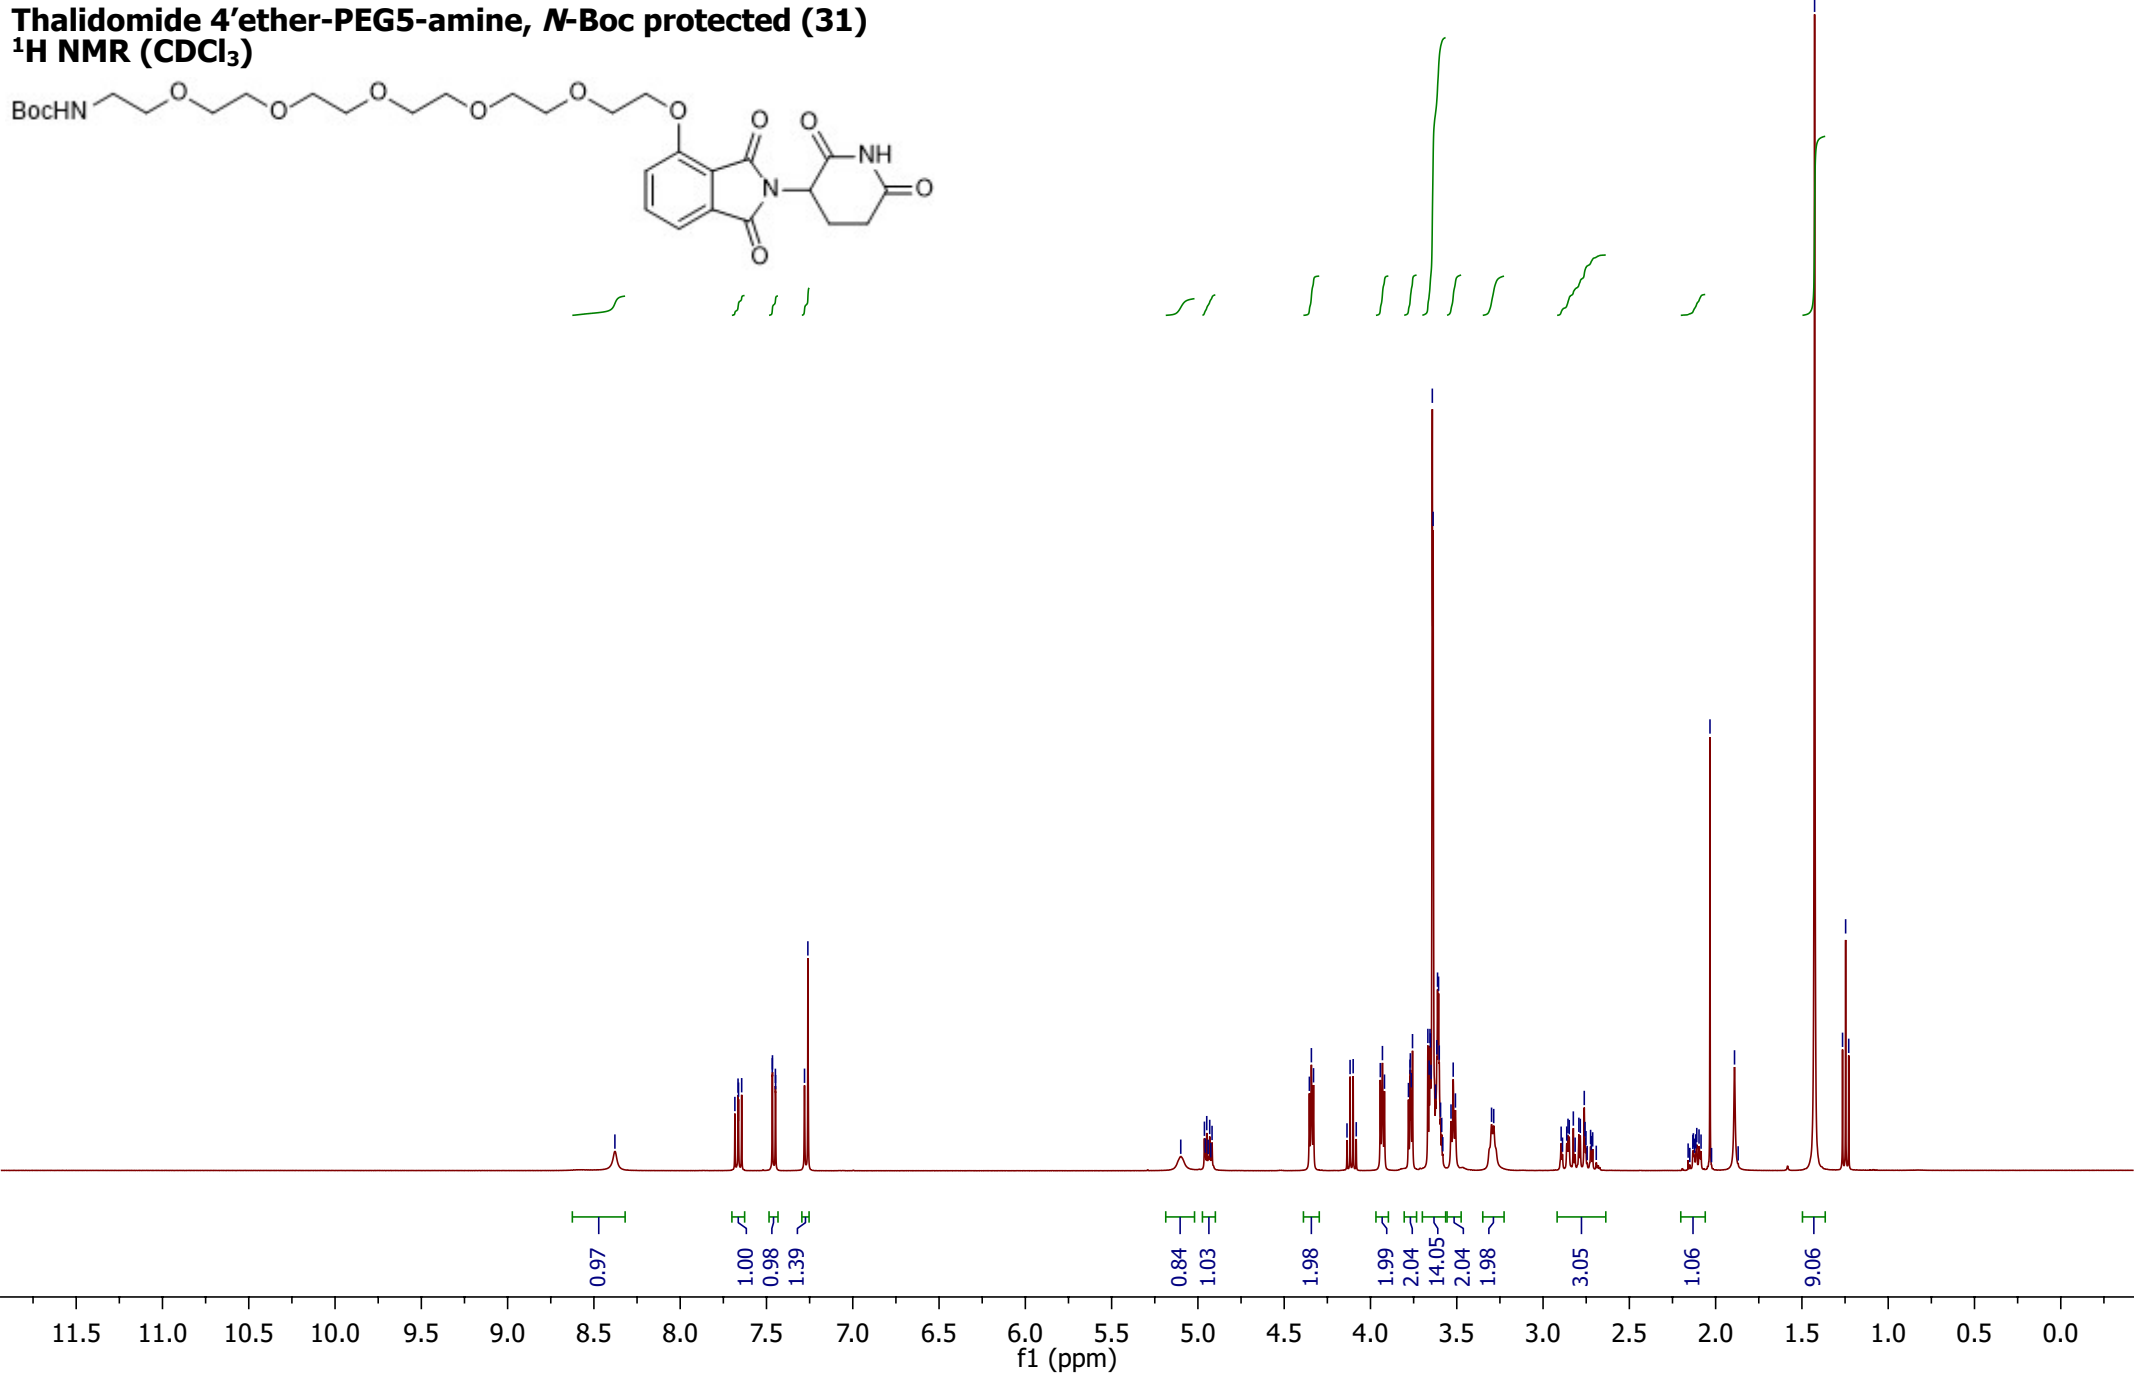





**N-Boc-PEG6-OTs (34)**  
**<sup>1</sup>H NMR (CDCl<sub>3</sub>)**

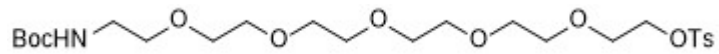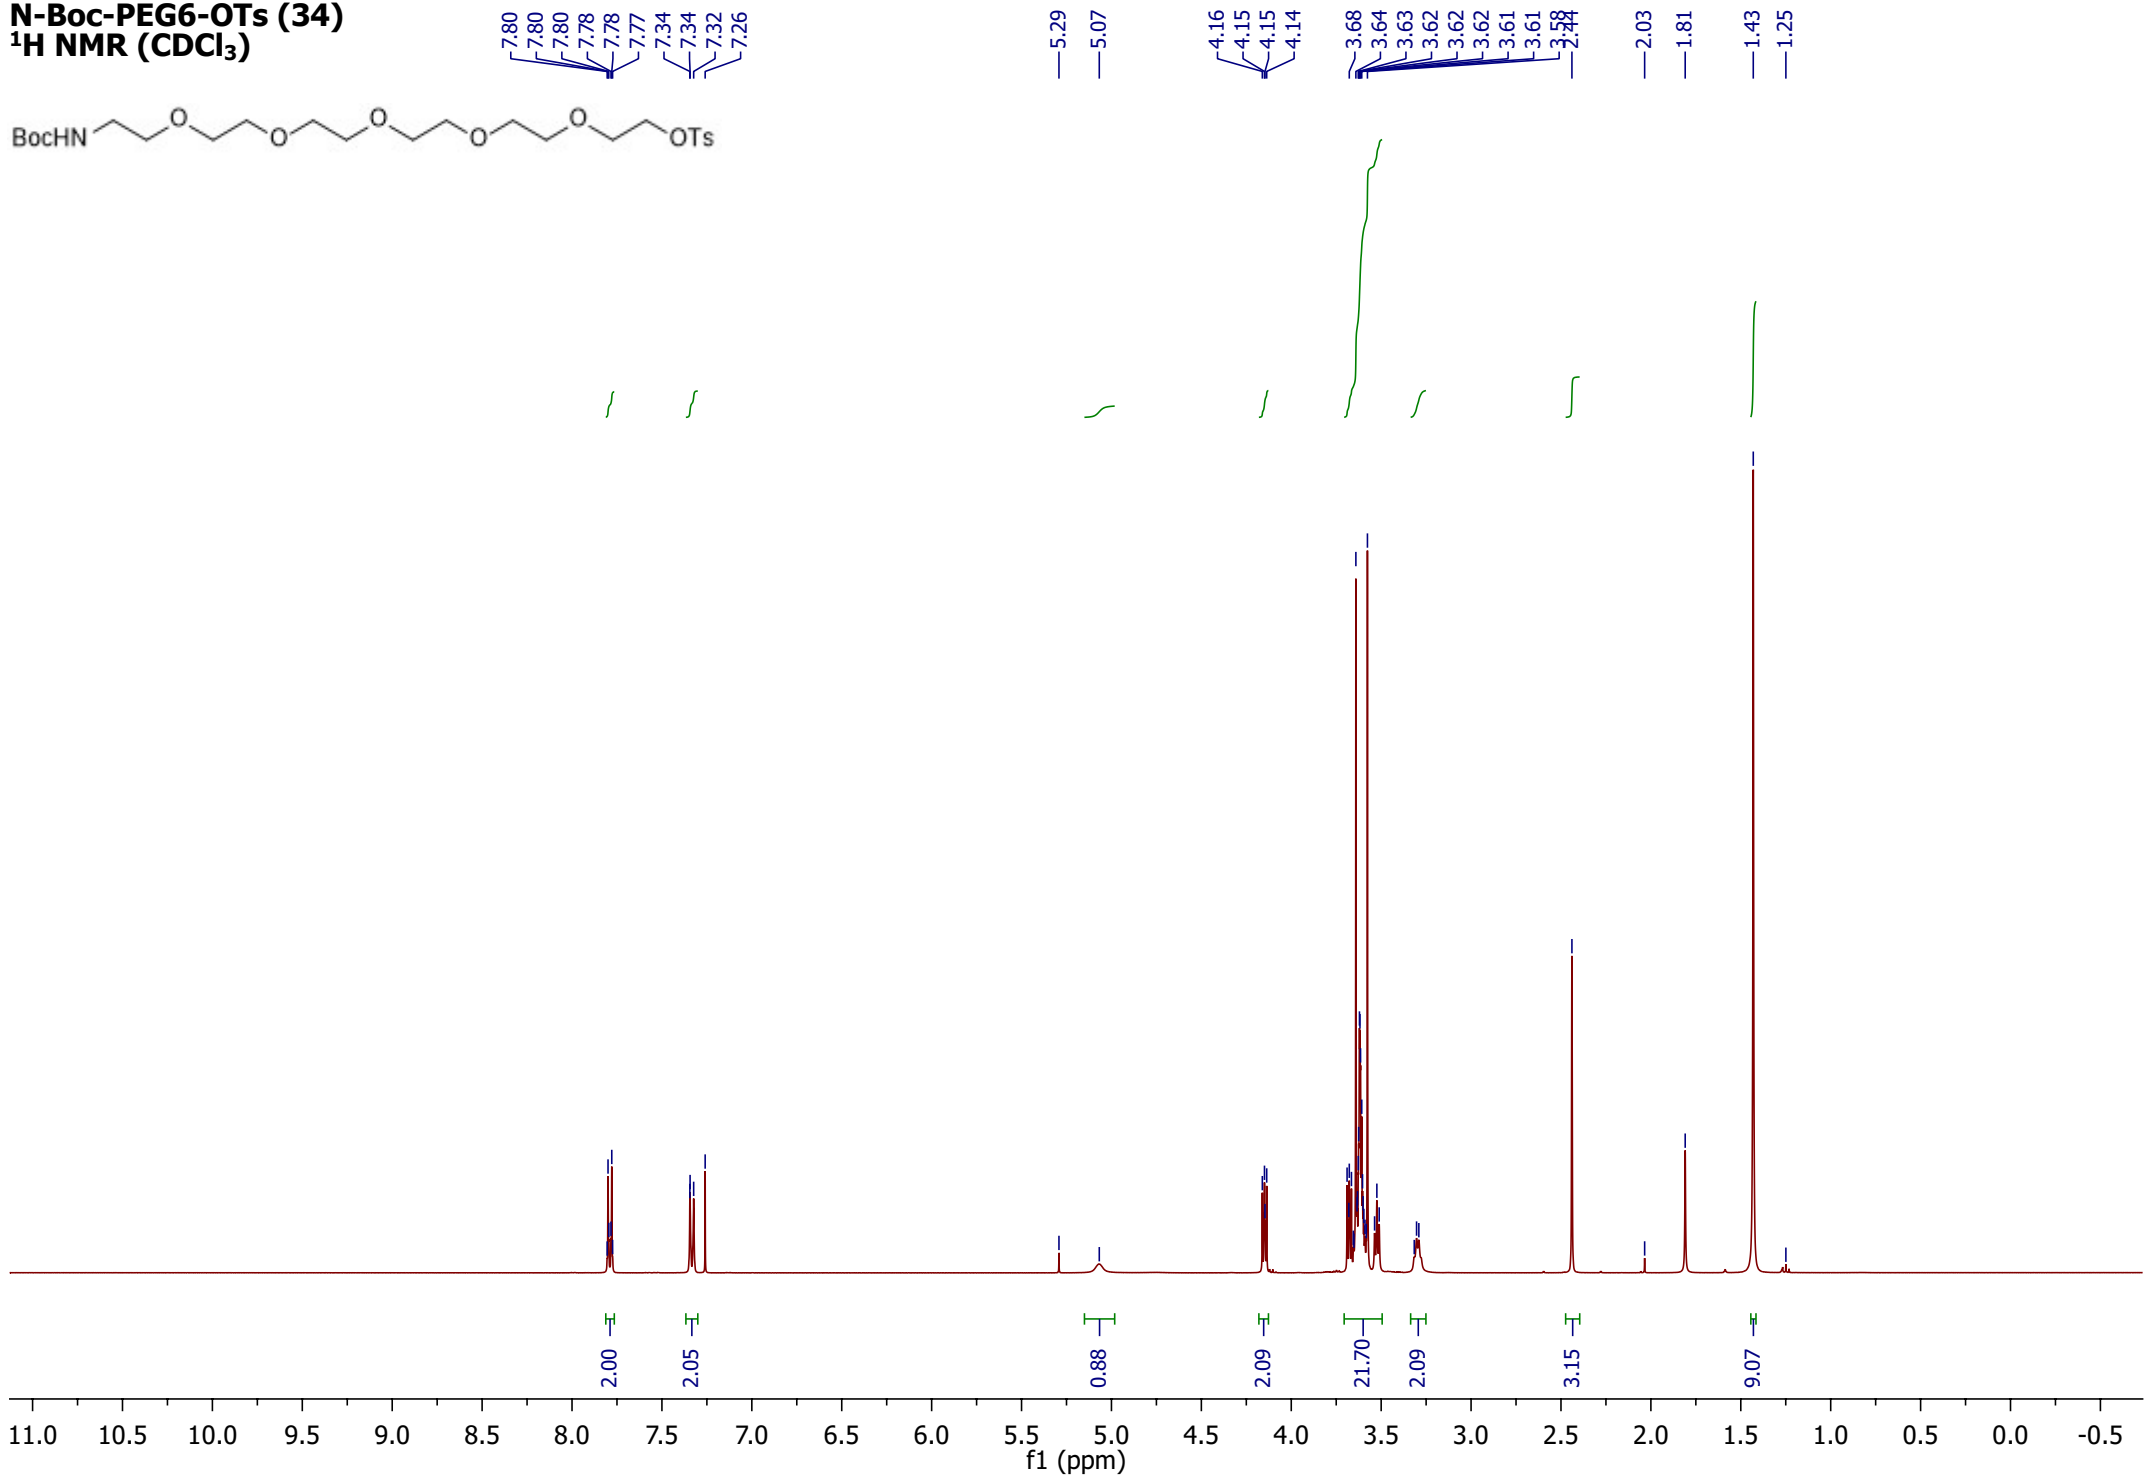

Supplement: d3ob00983a1.pdf [file d3ob00983a1.pdf]
